# Supplementary material for: Phase-transfer catalyzed Michael/ammonolysis cascade reactions of enaminones and olefinic azlactones: a new approach to structurally diverse quinoline-2,5-diones
Source: Royal Society of Chemistry journal article supplement (doi:10.1039/d2ob00096b), 2022-01-01
Supplement: d2ob00096b1.pdf [file d2ob00096b1.pdf]

Supporting information

**Phase-transfer catalyzed Michael/ammonolysis cascade reaction of  
enaminones and olefinic azlactones: new approach to structurally  
diverse quinoline-2,5-diones**

Lin Chen<sup>\*a,1</sup> and Wei Liang<sup>a,1</sup>

<sup>a</sup> School of Chemistry and Materials Science, Guizhou Normal University, Guiyang  
550001, P. R. of China

\* Corresponding author, Email: chenlin8310@aliyun.com

<sup>1</sup> Lin Chen and Wei Liang contributed equally to this work.

Table of contents

|                                                                                                                                            |      |
|--------------------------------------------------------------------------------------------------------------------------------------------|------|
| 1. General procedure for the syntheses of products <b>3</b> and <b>4</b>                                                                   | S1   |
| 2. Crystallographic information for products <b>3a</b> and <b>4g</b>                                                                       | S35  |
| 3. <sup>1</sup> H NOESY NMR spectra for compounds <b>3a</b> , <b>4g</b> , <b>10</b> and <b>12</b>                                          | S37  |
| 4. <sup>1</sup> H, <sup>13</sup> C and <sup>19</sup> F NMR spectra for products <b>3</b> and <b>4</b>                                      | S39  |
| 5. <sup>1</sup> H, <sup>13</sup> C and <sup>19</sup> F NMR spectra for compounds <b>7</b> , <b>9</b> , <b>10</b> , <b>12</b> and <b>13</b> | S97  |
| 6. Chiral HPLC spectra for product <b>3a</b>                                                                                               | S103 |

## 1. General procedure for the syntheses of products 3 and 4

Enaminone **1** (0.1 mmol), olefinic azlactone **2** (0.1 mmol, 1.0 equiv.), TBAB (3.2 mg, 10 mol%), KOH (16.8 mg, 0.3 mmol, 3.0 equiv.) and dichloromethane (2.0 mL) were sequentially added into a glass tube. After been stirred at 25 °C for 10-20 min, the reaction mixture was diluted with dichloromethane and filtered through a thin pad of silica gel. The resulting filtrate was concentrated under reduced pressure and the residue was purified to afford the desire products **3** and **4**.

### *N*-(7,7-dimethyl-2,5-dioxo-4-phenyl-1-(*p*-tolyl)-1,2,3,4,5,6,7,8-octahydroquinolin-3-yl)benzamide (**3a**)

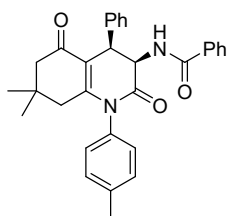

Purified by silica gel column chromatography (Petroleum ether/EtOAc = 2/1); white solid; 44.5 mg, 93% yield; >99:1 dr; M.P.: 267.3-268.1 °C; <sup>1</sup>H NMR (400 MHz, CDCl<sub>3</sub>) δ 7.68-7.61 (m, 2H), 7.48-7.41 (m, 1H), 7.39-7.33 (m, 2H), 7.33-7.29 (m, 2H), 7.29-7.25 (m, 2H), 7.23 (dd, *J* = 7.0, 4.2 Hz, 3H), 7.11 (d, *J* = 8.2 Hz, 2H), 6.55 (d, *J* = 6.7 Hz, 1H), 5.41-5.34 (m, 1H), 4.90 (d, *J* = 7.6 Hz, 1H), 2.42 (s, 3H), 2.30 (t, *J* = 9.5 Hz, 2H), 2.26-2.19 (m, 1H), 2.11 (d, *J* = 17.6 Hz, 1H), 1.07 (s, 3H), 1.00 (s, 3H); <sup>13</sup>C NMR {<sup>1</sup>H} (101 MHz, CDCl<sub>3</sub>): δ 195.1, 169.5, 167.3, 152.3, 139.4, 136.4, 134.0, 134.0, 131.8, 130.6, 130.5, 129.0, 128.9, 128.6, 128.2, 127.8, 127.5, 127.1, 117.5, 54.0, 50.2, 41.6, 38.6, 33.1, 28.7, 27.9, 21.3; FTIR (cm<sup>-1</sup>): 3439, 2968, 2917, 1714, 1665, 1650, 1612, 1514, 1487, 1369, 1310, 1274, 1237, 695; HRMS (ESI-TOF) *m/z*: [M + H]<sup>+</sup> calcd for C<sub>31</sub>H<sub>31</sub>N<sub>2</sub>O<sub>3</sub> 479.2329, found 479.2338.

### *N*-(1-(4-methoxyphenyl)-7,7-dimethyl-2,5-dioxo-4-phenyl-1,2,3,4,5,6,7,8-octahydroquinolin-3-yl)benzamide (**3b**)

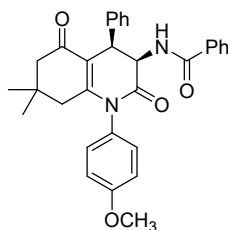

Purified by silica gel column chromatography (Petroleum ether/EtOAc = 2/1); white solid; 41.0 mg, 83% yield; >99:1 dr; M.P.: 221.7-224.3 °C; <sup>1</sup>H NMR (400 MHz, CDCl<sub>3</sub>) δ 7.70-7.60 (m, 2H), 7.47 (m, 1H), 7.38 (t, *J* = 7.5 Hz, 2H), 7.34-7.27 (m, 2H), 7.25 (dd, *J* = 7.4, 1.9 Hz, 2H), 7.23-7.21 (m, 1H), 7.15 (dd, *J* = 7.5, 1.6 Hz, 2H), 7.03 (t, *J* = 8.4 Hz, 2H), 6.53 (d, *J* = 6.8 Hz, 1H), 5.40-5.34 (m, 1H), 4.89 (d, *J* = 7.6 Hz, 1H), 3.85 (d, *J* = 16.1 Hz, 3H), 2.31 (t, *J* = 9.8 Hz, 2H), 2.23 (d, *J* = 17.7 Hz, 1H), 2.12 (d, *J* = 17.5 Hz, 1H), 1.09 (s, 3H), 1.01 (s, 3H); <sup>13</sup>C NMR {<sup>1</sup>H} (101 MHz, CDCl<sub>3</sub>) δ 195.1, 169.7, 167.3, 159.9, 152.5, 136.4, 134.0, 131.8, 130.3, 129.1, 128.9, 128.8, 128.6, 128.2, 127.8, 127.1, 117.4, 115.2, 115.0, 55.6, 54.0, 50.2, 41.7, 38.6, 33.0, 28.7, 27.9; FTIR (cm<sup>-1</sup>): 3437, 2960, 2926, 1708, 1669, 1654, 1512, 1487, 1370, 1254, 1189, 1151, 726; HRMS (ESI-TOF) *m/z*: [M + H]<sup>+</sup> calcd for C<sub>31</sub>H<sub>31</sub>N<sub>2</sub>O<sub>4</sub> 495.2278, found 495.2286.

***N*-(7,7-dimethyl-2,5-dioxo-4-phenyl-1-(4-(trifluoromethoxy)phenyl)-1,2,3,4,5,6,7,8-octahydroquinolin-3-yl)benzamide (3c)**

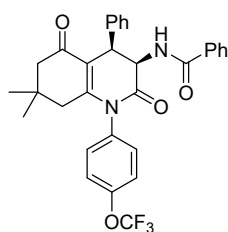

Purified by silica gel column chromatography (Petroleum ether/EtOAc = 2/1); white solid; 46.0 mg, 84% yield; >99:1 dr; M.P.: 132.0-132.9 °C; <sup>1</sup>H NMR (400 MHz, CDCl<sub>3</sub>) δ 7.69-7.62 (m, 2H), 7.51-7.44 (m, 1H), 7.37 (dd, *J* = 10.4, 4.7 Hz, 4H), 7.34-7.31 (m, 1H), 7.31-7.25 (m, 4H), 7.23 (dd, *J* = 7.8, 6.2 Hz, 2H), 6.50 (d, *J* = 7.0 Hz, 1H), 5.41 (t, *J* = 7.3 Hz, 1H), 4.89 (d, *J* = 7.6 Hz, 1H), 2.32 (t, *J* = 9.3 Hz, 2H), 2.27-2.16 (m, 1H), 2.08 (d, *J* = 17.6 Hz, 1H), 1.10 (s, 3H), 1.03 (s, 3H); <sup>13</sup>C NMR {<sup>1</sup>H} (101 MHz, CDCl<sub>3</sub>) δ 194.9, 169.5, 167.3, 151.4, 149.4 (d, *J* = 2.0 Hz), 136.1, 134.9,

133.9, 131.9, 131.1, 129.4, 129.0, 128.6, 128.1, 128.0, 127.1, 122.2, 122.1, 120.4 (q,  $J = 259.6$  Hz), 118.1, 53.9, 50.1, 41.7, 38.6, 33.2, 28.8, 27.8;  $^{19}\text{F}$  NMR (377 MHz,  $\text{CDCl}_3$ )  $\delta$  -57.77; FTIR ( $\text{cm}^{-1}$ ): 3443, 2963, 2921, 1717, 1666, 1646, 1541, 1515, 1373, 1268, 1183, 1146, 700; HRMS (ESI-TOF)  $m/z$ :  $[\text{M} + \text{H}]^+$  calcd for  $\text{C}_{31}\text{H}_{28}\text{F}_3\text{N}_2\text{O}_4$  549.1996, found 549.2007.

***N*-(7,7-dimethyl-2,5-dioxo-4-phenyl-1-(4-(trifluoromethyl)phenyl)-1,2,3,4,5,6,7,8-octahydroquinolin-3-yl)benzamide (3d)**

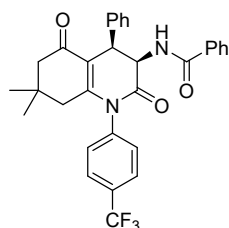

Purified by silica gel column chromatography (Petroleum ether/EtOAc = 2/1); white solid; 47.9 mg, 90% yield; >99:1 dr; M.P.: 155.2-156.2 °C;  $^1\text{H}$  NMR (400 MHz,  $\text{CDCl}_3$ )  $\delta$  7.82 (d,  $J = 8.0$  Hz, 2H), 7.69-7.61 (m, 2H), 7.51-7.45 (m, 1H), 7.38 (t,  $J = 7.5$  Hz, 4H), 7.34-7.30 (m, 1H), 7.30-7.25 (m, 2H), 7.25-7.19 (m, 2H), 6.48 (d,  $J = 7.0$  Hz, 1H), 5.43 (t,  $J = 7.3$  Hz, 1H), 4.90 (d,  $J = 7.6$  Hz, 1H), 2.33 (t,  $J = 9.0$  Hz, 2H), 2.28-2.17 (m, 1H), 2.06 (d,  $J = 17.7$  Hz, 1H), 1.10 (s, 3H), 1.03 (s, 3H);  $^{13}\text{C}$  NMR ( $^{1}\text{H}$ ) (101 MHz,  $\text{CDCl}_3$ )  $\delta$  194.9, 169.4, 167.4, 151.0, 139.9 (d,  $J = 1.0$  Hz), 136.0, 133.8, 131.9, 131.6, 131.2, 130.2, 130.1, 129.1, 128.4, 128.3, 128.1, 128.0, 127.1, 126.4 (q,  $J = 292.6$  Hz), 118.4, 53.9, 50.1, 41.8, 38.7, 33.3, 28.9, 27.7;  $^{19}\text{F}$  NMR (377 MHz,  $\text{CDCl}_3$ )  $\delta$  -62.65; FTIR ( $\text{cm}^{-1}$ ): 3426, 2960, 2925, 1714, 1669, 1640, 1544, 1495, 1379, 1334, 1243, 1189, 700; HRMS (ESI-TOF)  $m/z$ :  $[\text{M} + \text{H}]^+$  calcd for  $\text{C}_{31}\text{H}_{28}\text{F}_3\text{N}_2\text{O}_3$  533.2047, found 533.2055.

***N*-(1-(4-fluorophenyl)-7,7-dimethyl-2,5-dioxo-4-phenyl-1,2,3,4,5,6,7,8-octahydroquinolin-3-yl)benzamide (3e)**

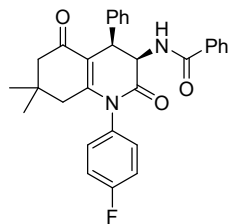

Purified by silica gel column chromatography (Petroleum ether/EtOAc = 2/1); white solid; 42.9 mg, 89% yield; >99:1 dr; M.P.: 242.5-242.7 °C; <sup>1</sup>H NMR (400 MHz, CDCl<sub>3</sub>) δ 7.69-7.62 (m, 2H), 7.48 (m, 1H), 7.38 (dd, *J* = 10.5, 4.6 Hz, 2H), 7.34-7.30 (m, 1H), 7.29-7.25 (m, 2H), 7.23 (d, *J* = 3.2 Hz, 3H), 7.21 (d, *J* = 4.0 Hz, 3H), 6.49 (d, *J* = 6.9 Hz, 1H), 5.40 (t, *J* = 7.3 Hz, 1H), 4.89 (d, *J* = 7.6 Hz, 1H), 2.32 (t, *J* = 9.9 Hz, 2H), 2.28-2.16 (m, 1H), 2.09 (d, *J* = 17.6 Hz, 1H), 1.10 (s, 3H), 1.02 (s, 3H); <sup>13</sup>C NMR {<sup>1</sup>H} (101 MHz, CDCl<sub>3</sub>) δ 195.0, 169.6, 167.3, 162.6 (d, *J* = 251.5 Hz), 151.7, 136.2, 133.9, 132.5, 131.8, 131.2, 129.5, 129.0, 128.6, 128.1, 127.9, 127.1, 117.8, 117.2 (d, *J* = 14.1 Hz), 116.9 (d, *J* = 14.1 Hz), 53.9, 50.1, 41.7, 38.6, 33.1, 28.8, 27.9; <sup>19</sup>F NMR (377 MHz, CDCl<sub>3</sub>) δ -111.09; FTIR (cm<sup>-1</sup>): 3446, 2975, 2921, 1717, 1671, 1646, 1549, 1510, 1376, 1243, 1143, 1070, 695; HRMS (ESI-TOF) *m/z*: [M + H]<sup>+</sup> calcd for C<sub>30</sub>H<sub>28</sub>FN<sub>2</sub>O<sub>3</sub> 483.2078, found 483.2081.

***N*-(1-(4-chlorophenyl)-7,7-dimethyl-2,5-dioxo-4-phenyl-1,2,3,4,5,6,7,8-octahydroquinolin-3-yl)benzamide (3f)**

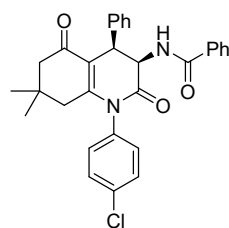

Purified by silica gel column chromatography (Petroleum ether/EtOAc = 2/1); white solid; 46.3 mg, 93% yield; >99:1 dr; M.P.: 267.7-268.4 °C; <sup>1</sup>H NMR (400 MHz, CDCl<sub>3</sub>) δ 7.68-7.63 (m, 2H), 7.55-7.49 (m, 2H), 7.47 (td, *J* = 2.4, 1.6 Hz, 1H), 7.38 (dd, *J* = 10.5, 4.6 Hz, 2H), 7.33-7.29 (m, 1H), 7.27 (dd, *J* = 4.4, 2.7 Hz, 1H), 7.26-7.21 (m, 2H), 7.19 (dd, *J* = 7.1, 6.2 Hz, 3H), 6.49 (d, *J* = 6.9 Hz, 1H), 5.40 (t, *J* = 7.3 Hz, 1H), 4.88 (d, *J* = 7.6 Hz, 1H), 2.32 (t, *J* = 9.6 Hz, 2H), 2.27-2.17 (m, 1H), 2.08 (d, *J* = 17.6 Hz, 1H), 1.09 (s, 3H), 1.02 (s, 3H); <sup>13</sup>C NMR {<sup>1</sup>H} (101 MHz, CDCl<sub>3</sub>) δ

194.9, 169.4, 167.3, 151.5, 136.1, 135.3, 135.1, 133.9, 131.9, 130.8, 130.3, 130.2, 129.1, 129.0, 128.6, 128.1, 127.9, 127.1, 118.0, 53.9, 50.1, 41.7, 38.6, 33.2, 28.8, 27.8; FTIR (cm<sup>-1</sup>): 3443, 2960, 2923, 1720, 1669, 1657, 1544, 1515, 1487, 1376, 1248, 1183, 1143, 703; HRMS (ESI-TOF) m/z: [M + H]<sup>+</sup> calcd for C<sub>30</sub>H<sub>28</sub>ClN<sub>2</sub>O<sub>3</sub> 499.1783, found 499.1789.

***N*-(1-(4-bromophenyl)-7,7-dimethyl-2,5-dioxo-4-phenyl-1,2,3,4,5,6,7,8-octahydroquinolin-3-yl)benzamide (3g)**

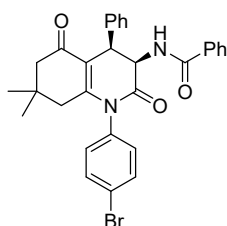

Purified by silica gel column chromatography (Petroleum ether/EtOAc = 2/1); white solid; 48.9 mg, 90% yield; >99:1 dr; M.P.: 259.7-261.3 °C; <sup>1</sup>H NMR (400 MHz, CDCl<sub>3</sub>) δ 7.71-7.60 (m, 4H), 7.48 (t, *J* = 7.4 Hz, 1H), 7.38 (t, *J* = 7.5 Hz, 2H), 7.33-7.29 (m, 1H), 7.27 (dd, *J* = 4.1, 2.4 Hz, 1H), 7.26-7.17 (m, 3H), 7.12 (t, *J* = 7.9 Hz, 2H), 6.48 (d, *J* = 6.9 Hz, 1H), 5.40 (t, *J* = 7.3 Hz, 1H), 4.88 (d, *J* = 7.6 Hz, 1H), 2.32 (t, *J* = 9.6 Hz, 2H), 2.27-2.17 (m, 1H), 2.08 (d, *J* = 17.6 Hz, 1H), 1.09 (s, 3H), 1.02 (s, 3H); <sup>13</sup>C NMR {<sup>1</sup>H} (101 MHz, CDCl<sub>3</sub>) δ 194.9, 169.4, 167.3, 151.4, 136.1, 135.6, 133.9, 133.3, 133.2, 131.9, 131.1, 129.4, 129.0, 128.6, 128.1, 127.9, 127.1, 123.3, 118.0, 53.9, 50.1, 41.7, 38.6, 33.2, 28.8, 27.8; FTIR (cm<sup>-1</sup>): 3435, 3972, 3923, 1710, 1669, 1654, 1512, 1487, 1370, 1264, 1179, 1155, 700; HRMS (ESI-TOF) m/z: [M + H]<sup>+</sup> calcd for C<sub>30</sub>H<sub>28</sub>BrN<sub>2</sub>O<sub>3</sub> 543.1278, found 543.1270.

***N*-(7,7-dimethyl-2,5-dioxo-4-phenyl-1-(*m*-tolyl)-1,2,3,4,5,6,7,8-octahydroquinolin-3-yl)benzamide (3h)**

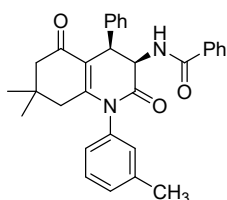

Purified by silica gel column chromatography (Petroleum ether/EtOAc = 2/1); white

solid; 40.6 mg, 85% yield; >99:1 dr; M.P.: 201.8-202.3 °C; <sup>1</sup>H NMR (400 MHz, CDCl<sub>3</sub>) δ 7.65 (d, *J* = 7.9 Hz, 2H), 7.45 (m, 2H), 7.37 (t, *J* = 7.5 Hz, 2H), 7.34-7.27 (m, 3H), 7.27-7.20 (m, 3H), 7.04 (d, *J* = 11.5 Hz, 2H), 6.54 (d, *J* = 5.9 Hz, 1H), 5.38 (t, *J* = 7.2 Hz, 1H), 4.95-4.85 (m, 1H), 2.44 (d, *J* = 13.5 Hz, 3H), 2.31 (t, *J* = 9.1 Hz, 2H), 2.27-2.18 (m, 1H), 2.11 (d, *J* = 17.6 Hz, 1H), 1.09 (s, 3H), 1.01 (s, 3H); <sup>13</sup>C NMR{<sup>1</sup>H} (101 MHz, CDCl<sub>3</sub>) δ 195.1, 169.4, 167.3, 152.2, 140.2, 136.6, 136.3, 134.0, 131.8, 130.1, 129.8, 128.9, 128.6, 128.2, 127.8, 127.1, 126.3, 124.7, 117.5, 54.0, 50.2, 41.6, 38.6, 33.1, 28.7, 27.9, 21.4; FTIR (cm<sup>-1</sup>): 3417, 2958, 2921, 1703, 1657, 1629, 1518, 1490, 1373, 1251, 1180, 1143, 814, 737, 703; HRMS (ESI-TOF) *m/z*: [M + H]<sup>+</sup> calcd for C<sub>31</sub>H<sub>31</sub>N<sub>2</sub>O<sub>3</sub> 479.2329, found 479.2331.

***N*-(1-(3-methoxyphenyl)-7,7-dimethyl-2,5-dioxo-4-phenyl-1,2,3,4,5,6,7,8-octahydroquinolin-3-yl)benzamide (3i)**

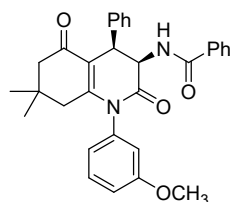

Purified by silica gel column chromatography (Petroleum ether/EtOAc = 2/1); white solid; 43.5 mg, 88% yield; >99:1 dr; M.P.: 222.3-223.4 °C; <sup>1</sup>H NMR (400 MHz, CDCl<sub>3</sub>) δ 7.70-7.60 (m, 2H), 7.50-7.41 (m, 2H), 7.37 (dd, *J* = 10.5, 4.6 Hz, 2H), 7.34-7.27 (m, 2H), 7.25 (dd, *J* = 9.5, 4.5 Hz, 3H), 7.02 (d, *J* = 8.3 Hz, 1H), 6.82 (dd, *J* = 18.2, 10.4 Hz, 2H), 6.52 (d, *J* = 5.9 Hz, 1H), 5.44-5.32 (m, 1H), 4.89 (d, *J* = 7.3 Hz, 1H), 3.85 (d, *J* = 11.0 Hz, 3H), 2.31 (t, *J* = 9.6 Hz, 2H), 2.25 (d, *J* = 3.5 Hz, 1H), 2.14 (d, *J* = 17.5 Hz, 1H), 1.09 (s, 3H), 1.01 (s, 3H); <sup>13</sup>C NMR{<sup>1</sup>H} (101 MHz, CDCl<sub>3</sub>) δ 195.1, 169.3, 167.3, 160.7, 152.1, 137.7, 136.3, 134.0, 131.8, 130.6, 129.0, 128.6, 127.8, 127.1, 121.5, 119.9, 117.6, 115.0, 113.9, 55.6, 54.0, 50.2, 41.4, 38.7, 33.1, 28.6, 28.0; FTIR (cm<sup>-1</sup>): 3415, 2960, 2923, 1715, 1661, 1649, 1521, 1487, 1376, 1248, 1180, 1141, 754, 717, 698; HRMS (ESI-TOF) *m/z*: [M + H]<sup>+</sup> calcd for C<sub>31</sub>H<sub>31</sub>N<sub>2</sub>O<sub>4</sub> 495.2278, found 495.2285.

***N*-(7,7-dimethyl-2,5-dioxo-4-phenyl-1-(3-(trifluoromethyl)phenyl)-1,2,3,4,5,6,7,8-**

**octahydroquinolin-3-yl)benzamide (3j)**

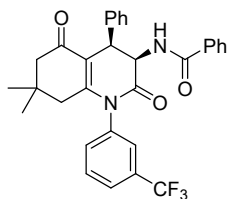

Purified by silica gel column chromatography (Petroleum ether/EtOAc = 2/1); white solid; 48.9 mg, 92% yield; >99:1 dr; M.P.: 139.9-140.4 °C; <sup>1</sup>H NMR (400 MHz, CDCl<sub>3</sub>) δ 7.76 (t, *J* = 7.7 Hz, 1H), 7.67 (dd, *J* = 14.7, 7.5 Hz, 3H), 7.60-7.42 (m, 3H), 7.38 (t, *J* = 7.6 Hz, 2H), 7.35-7.25 (m, 3H), 7.25-7.16 (m, 2H), 6.48 (d, *J* = 5.6 Hz, 1H), 5.44 (t, *J* = 7.2 Hz, 1H), 4.96-4.85 (m, 1H), 2.35 (d, *J* = 15.8 Hz, 2H), 2.20 (d, *J* = 17.7 Hz, 1H), 2.07 (d, *J* = 17.6 Hz, 1H), 1.10 (s, 3H), 1.03 (s, 3H); <sup>13</sup>C NMR{<sup>1</sup>H} (101 MHz, CDCl<sub>3</sub>) δ 194.9, 169.5, 167.3, 151.1, 137.2, 136.0 (d, *J* = 13.1 Hz), 133.8, 133.1, 131.9, 131.2, 130.6, 129.1, 128.6, 128.0, 127.1, 126.6, 126.2 (q, *J* = 10.1 Hz), 124.7, 122.0, 118.4, 53.8, 50.1, 41.8, 38.7, 33.3, 28.8, 27.8; <sup>19</sup>F NMR (377 MHz, CDCl<sub>3</sub>) δ -62.62; FTIR (cm<sup>-1</sup>): 3423, 2960, 2935, 1714, 1660, 1629, 1512, 1486, 1379, 1328, 1186, 1129, 805, 740, 700; HRMS (ESI-TOF) *m/z*: [M + H]<sup>+</sup> calcd for C<sub>31</sub>H<sub>28</sub>F<sub>3</sub>N<sub>2</sub>O<sub>3</sub> 533.2047, found 533.2055.

***N*-(1-(3-fluorophenyl)-7,7-dimethyl-2,5-dioxo-4-phenyl-1,2,3,4,5,6,7,8-octahydroquinolin-3-yl)benzamide (3k)**

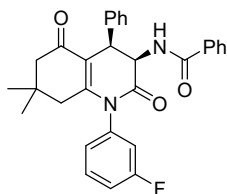

Purified by silica gel column chromatography (Petroleum ether/EtOAc = 2/1); white solid; 43.4 mg, 90% yield; >99:1 dr; M.P.: 226.1-228.4 °C; <sup>1</sup>H NMR (400 MHz, CDCl<sub>3</sub>) δ 7.69-7.61 (m, 2H), 7.57-7.44 (m, 2H), 7.38 (dd, *J* = 10.5, 4.6 Hz, 2H), 7.34-7.25 (m, 3H), 7.21 (td, *J* = 10.8, 3.7 Hz, 3H), 7.10-6.93 (m, 2H), 6.49 (d, *J* = 6.9 Hz, 1H), 5.40 (t, *J* = 7.3 Hz, 1H), 4.89 (d, *J* = 7.6 Hz, 1H), 2.32 (t, *J* = 9.3 Hz, 2H), 2.24 (d, *J* = 17.8 Hz, 1H), 2.11 (d, *J* = 17.6 Hz, 1H), 1.10 (s, 3H), 1.03 (s, 3H); <sup>13</sup>C NMR{<sup>1</sup>H} (101 MHz, CDCl<sub>3</sub>) δ 195.0, 169.3, 167.3, 163.1 (d, *J* = 250.5 Hz), 151.5,



138.0, 136.1, 133.9, 131.9, 131.1, 129.0, 128.6, 128.1, 127.1, 125.4, 123.7, 117.9, 117.2 (d,  $J = 23.2$  Hz), 116.6 (d,  $J = 20.2$  Hz), 53.9, 50.1, 41.6, 38.7, 33.2, 28.8, 27.8;  $^{19}\text{F}$  NMR (377 MHz,  $\text{CDCl}_3$ )  $\delta$  -109.69; FTIR ( $\text{cm}^{-1}$ ): 3415, 2958, 2929, 1714, 1663, 1643, 1518, 1484, 1376, 1246, 1183, 1138, 780, 757, 703; HRMS (ESI-TOF)  $m/z$ :  $[\text{M} + \text{H}]^+$  calcd for  $\text{C}_{30}\text{H}_{28}\text{FN}_2\text{O}_3$  483.2078, found 483.2082.

***N*-(1-(3-bromophenyl)-7,7-dimethyl-2,5-dioxo-4-phenyl-1,2,3,4,5,6,7,8-octahydroquinolin-3-yl)benzamide (3l)**

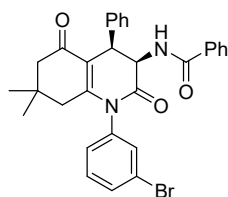

Purified by silica gel column chromatography (Petroleum ether/EtOAc = 2/1); white solid; 50.0 mg, 92% yield; >99:1 dr; M.P.: 176.4-177.1 °C;  $^1\text{H}$  NMR (400 MHz,  $\text{CDCl}_3$ )  $\delta$  7.70-7.58 (m, 3H), 7.45 (td,  $J = 13.7, 10.0$  Hz, 2H), 7.37 (t,  $J = 7.6$  Hz, 3H), 7.28 (dd,  $J = 18.7, 10.4$  Hz, 3H), 7.21 (d,  $J = 6.8$  Hz, 3H), 6.51 (d,  $J = 6.8$  Hz, 1H), 5.40 (t,  $J = 6.2$  Hz, 1H), 4.89 (d,  $J = 7.6$  Hz, 1H), 2.32 (d,  $J = 16.6$  Hz, 2H), 2.23 (d,  $J = 17.6$  Hz, 1H), 2.09 (dd,  $J = 17.2, 11.7$  Hz, 1H), 1.08 (s, 3H), 1.02 (s, 3H);  $^{13}\text{C}$  NMR  $\{^1\text{H}\}$  (101 MHz,  $\text{CDCl}_3$ )  $\delta$  195.0, 169.3, 167.3, 151.5, 137.8, 136.1, 133.9, 132.6, 131.9, 131.1, 129.0, 128.6, 128.1, 128.0, 127.1, 126.6, 123.3, 123.1, 118.0, 53.9, 50.1, 41.7, 38.6, 33.2, 28.8, 27.9; FTIR ( $\text{cm}^{-1}$ ): 3429, 2958, 2928, 1714, 1663, 1640, 1532, 1476, 1373, 1314, 1143, 749, 723, 698; HRMS (ESI-TOF)  $m/z$ :  $[\text{M} + \text{H}]^+$  calcd for  $\text{C}_{30}\text{H}_{28}\text{BrN}_2\text{O}_3$  543.1278, found 543.1283.

***N*-(1-(2-fluorophenyl)-7,7-dimethyl-2,5-dioxo-4-phenyl-1,2,3,4,5,6,7,8-octahydroquinolin-3-yl)benzamide (major diastereomer of 3m)**

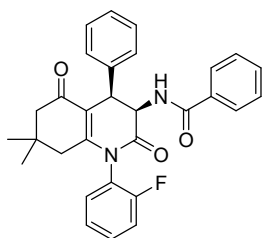

Purified by silica gel column chromatography (Petroleum ether/EtOAc = 1/1); white solid; 42.9 mg, 89% total yield; 63:37 dr; M.P.: 211.1-212.3 °C; <sup>1</sup>H NMR (400 MHz, CDCl<sub>3</sub>) δ 7.64 (td, *J* = 8.8, 4.3 Hz, 2H), 7.49 (m, 2H), 7.41-7.35 (m, 2H), 7.35-7.30 (m, 3H), 7.28 (t, *J* = 3.6 Hz, 2H), 7.26-7.18 (m, 3H), 6.41 (d, *J* = 7.2 Hz, 1H), 5.47 (t, *J* = 7.6 Hz, 1H), 4.85 (d, *J* = 7.9 Hz, 1H), 2.29 (d, *J* = 15.4 Hz, 2H), 2.17 (s, 1H), 2.15 (d, *J* = 8.4 Hz, 1H), 1.09 (s, 3H), 1.02 (s, 3H); <sup>13</sup>C NMR{<sup>1</sup>H} (101 MHz, CDCl<sub>3</sub>) δ 195.1, 169.3, 167.4, 158.5 (d, *J* = 250.5 Hz), 151.7, 136.2, 133.9, 131.8, 131.4 (d, *J* = 8.1 Hz), 128.9, 128.6, 128.4, 128.4, 127.1, 125.4 (d, *J* = 4.0 Hz), 124.1 (d, *J* = 13.1 Hz), 117.9, 117.1, 117.0, 54.0, 50.1, 40.9, 39.2, 33.0, 28.6, 28.1; <sup>19</sup>F NMR (377 MHz, CDCl<sub>3</sub>) δ -120.14; FTIR (cm<sup>-1</sup>): 3276, 2955, 2923, 1723, 1663, 1652, 1626, 1541, 1504, 1450, 1382, 1317, 1248, 1223, 1186, 1149, 1104, 763, 723, 698; HRMS (ESI-TOF) *m/z*: [M + H]<sup>+</sup> calcd for C<sub>30</sub>H<sub>28</sub>FN<sub>2</sub>O<sub>3</sub> 483.2078, found 483.2086.

***N*-(1-(2-fluorophenyl)-7,7-dimethyl-2,5-dioxo-4-phenyl-1,2,3,4,5,6,7,8-octahydroquinolin-3-yl)benzamide (minor diastereomer of 3*m*)**

<sup>1</sup>H NMR (400 MHz, CDCl<sub>3</sub>) δ 7.64 (td, *J* = 8.8, 4.3 Hz, 1.1H), 7.49 (m, 1.2H), 7.41-7.35 (m, 1H), 7.35-7.30 (m, 2.1H), 7.28 (t, *J* = 3.6 Hz, 1.4H), 7.26-7.18 (m, 1.2H), 6.55 (d, *J* = 6.5 Hz, 0.6H), 5.42 (dd, *J* = 7.5, 6.8 Hz, 0.6H), 4.95 (d, *J* = 7.6 Hz, 0.6H), 2.35 (d, *J* = 16.3 Hz, 1H), 2.22 (d, *J* = 4.4 Hz, 0.5H), 2.10 (d, *J* = 7.9 Hz, 0.5H), 1.11 (s, 1.7H), 1.02 (s, 1.6H); <sup>13</sup>C NMR{<sup>1</sup>H} (101 MHz, CDCl<sub>3</sub>) δ 194.9, 169.0, 167.3, 158.4 (d, *J* = 252.5 Hz), 151.6, 136.2, 133.9, 131.4 (d, *J* = 8.1 Hz), 131.2, 129.8, 128.9, 128.2, 127.8, 127.8, 125.2 (d, *J* = 4.0 Hz), 124.3 (d, *J* = 13.1 Hz), 117.3, 117.1, 116.8, 53.9, 50.1, 40.9, 38.4, 33.1, 28.7, 27.9; <sup>19</sup>F NMR (377 MHz, CDCl<sub>3</sub>) δ -119.66; FTIR (cm<sup>-1</sup>): 3276, 2955, 2923, 1723, 1663, 1652, 1626, 1541, 1504, 1450, 1382, 1317, 1248, 1223, 1186, 1149, 1104, 763, 723, 698; HRMS (ESI-TOF) *m/z*: [M + H]<sup>+</sup> calcd for C<sub>30</sub>H<sub>28</sub>FN<sub>2</sub>O<sub>3</sub> 483.2078, found 483.2086.

***N*-(1-(3,4-dimethylphenyl)-7,7-dimethyl-2,5-dioxo-4-phenyl-1,2,3,4,5,6,7,8-octahydroquinolin-3-yl)benzamide (3*n*)**

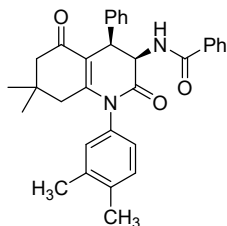

Purified by silica gel column chromatography (Petroleum ether/EtOAc = 2/1); white solid; 39.9 mg, 81% yield; >99:1 dr; M.P.: 131.4-133.2 °C; <sup>1</sup>H NMR (400 MHz, CDCl<sub>3</sub>) δ 7.65 (d, *J* = 8.0 Hz, 2H), 7.46 (t, *J* = 7.4 Hz, 1H), 7.37 (t, *J* = 7.6 Hz, 2H), 7.33-7.26 (m, 3H), 7.26-7.20 (m, 3H), 6.97 (t, *J* = 8.8 Hz, 2H), 6.59-6.51 (m, 1H), 5.37 (t, *J* = 7.2 Hz, 1H), 4.98-4.83 (m, 1H), 2.32 (t, *J* = 6.9 Hz, 6H), 2.29 (s, 2H), 2.24 (dd, *J* = 11.9, 5.9 Hz, 1H), 2.12 (d, *J* = 17.8 Hz, 1H), 1.08 (s, 3H), 1.01 (s, 3H); <sup>13</sup>C NMR{<sup>1</sup>H} (101 MHz, CDCl<sub>3</sub>) δ 195.2, 169.5, 167.3, 152.5, 138.6, 138.1, 136.4, 134.0, 131.8, 130.9, 130.0, 128.9, 128.6, 128.2, 127.8, 127.1, 126.4, 124.9, 117.4, 54.0, 50.2, 41.6, 38.6, 33.1, 28.7, 28.0, 20.0, 19.6; FTIR (cm<sup>-1</sup>): 3423, 2958, 2923, 1711, 1663, 1620, 1518, 1481, 1379, 1248, 1194, 1143, 760, 703; HRMS (ESI-TOF) *m/z*: [M + H]<sup>+</sup> calcd for C<sub>32</sub>H<sub>33</sub>N<sub>2</sub>O<sub>3</sub> 493.2486, found 493.2494.

***N*-(1-(3,4-difluorophenyl)-7,7-dimethyl-2,5-dioxo-4-phenyl-1,2,3,4,5,6,7,8-octahydroquinolin-3-yl)benzamide (3o)**

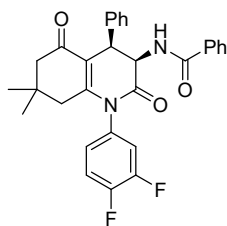

Purified by silica gel column chromatography (Petroleum ether/EtOAc = 2/1); white solid; 44.0 mg, 88% yield; >99:1 dr; M.P.: 171.2-173.4 °C; <sup>1</sup>H NMR (400 MHz, CDCl<sub>3</sub>) δ 7.71-7.60 (m, 2H), 7.52-7.44 (m, 1H), 7.38 (t, *J* = 7.6 Hz, 2H), 7.31 (dd, *J* = 16.2, 10.7 Hz, 4H), 7.19 (d, *J* = 7.1 Hz, 2H), 7.16-6.96 (m, 2H), 6.47 (d, *J* = 7.0 Hz, 1H), 5.40 (t, *J* = 7.2 Hz, 1H), 4.88 (d, *J* = 7.6 Hz, 1H), 2.32 (t, *J* = 9.4 Hz, 2H), 2.27 – 2.17 (m, 1H), 2.10 (d, *J* = 17.5 Hz, 1H), 1.10 (s, 3H), 1.03 (s, 3H); <sup>13</sup>C NMR{<sup>1</sup>H} (101 MHz, CDCl<sub>3</sub>) δ 194.9, 169.5, 167.3, 151.9 (d, *J* = 14.1 Hz), 151.2, 149.4 (d, *J* = 14.1 Hz), 136.0, 133.8, 132.6, 131.9, 129.1, 128.7, 128.0, 127.1, 126.2, 124.3, 119.2

(d,  $J = 22.2$  Hz), 118.4, 117.8 (d,  $J = 43.4$  Hz), 53.8, 50.1, 41.6, 38.6, 33.2, 28.8, 27.8;  $^{19}\text{F}$  NMR (377 MHz,  $\text{CDCl}_3$ )  $\delta$  -133.19 (d,  $J = 18.9$  Hz), -134.88 (d,  $J = 22.6$  Hz); FTIR ( $\text{cm}^{-1}$ ): 3435, 2969, 2909, 1711, 1669, 1643, 1549, 1521, 1376, 1268, 1220, 1203, 752, 698; HRMS (ESI-TOF)  $m/z$ :  $[\text{M} + \text{H}]^+$  calcd for  $\text{C}_{30}\text{H}_{27}\text{F}_2\text{N}_2\text{O}_3$  501.1984, found 501.1994.

***N*-(1-(3,4-dichlorophenyl)-7,7-dimethyl-2,5-dioxo-4-phenyl-1,2,3,4,5,6,7,8-octahydroquinolin-3-yl)benzamide (3p)**

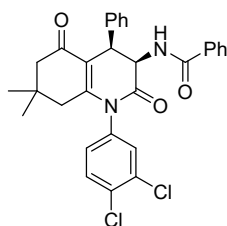

Purified by silica gel column chromatography (Petroleum ether/EtOAc = 2/1); white solid; 46.3 mg, 87% yield; >99:1 dr; M.P.: 155.0-155.6 °C;  $^1\text{H}$  NMR (400 MHz,  $\text{CDCl}_3$ )  $\delta$  7.68-7.63 (m, 2H), 7.60 (d,  $J = 7.8$  Hz, 1H), 7.44 (dd,  $J = 23.2, 15.8$  Hz, 2H), 7.35 (d,  $J = 7.4$  Hz, 2H), 7.28 (d,  $J = 9.6$  Hz, 3H), 7.21-7.17 (m, 2H), 7.13 (s, 1H), 6.50 (d,  $J = 6.9$  Hz, 1H), 5.39 (t,  $J = 7.3$  Hz, 1H), 4.87 (d,  $J = 7.6$  Hz, 1H), 2.30 (d,  $J = 16.7$  Hz, 2H), 2.27-2.17 (m, 1H), 2.15-1.97 (m, 1H), 1.08 (s, 3H), 1.01 (s, 3H);  $^{13}\text{C}$  NMR  $\{^1\text{H}\}$  (101 MHz,  $\text{CDCl}_3$ )  $\delta$  194.9, 169.3, 167.3, 151.1, 136.0, 135.9, 134.0, 133.8, 131.9, 131.6, 131.5, 129.9, 129.1, 128.7, 128.0, 127.3, 127.1, 118.2, 118.0, 53.9, 50.1, 41.6, 38.6, 33.2, 28.9, 27.8; FTIR ( $\text{cm}^{-1}$ ): 3473, 2963, 2915, 1717, 1666, 1640, 1518, 1476, 1373, 1231, 1180, 1143, 823, 698; HRMS (ESI-TOF)  $m/z$ :  $[\text{M} + \text{H}]^+$  calcd for  $\text{C}_{30}\text{H}_{27}\text{Cl}_2\text{N}_2\text{O}_3$  533.1393, found 533.1401.

***N*-(1-(3,5-bis(trifluoromethyl)phenyl)-7,7-dimethyl-2,5-dioxo-4-phenyl-1,2,3,4,5,6,7,8-octahydroquinolin-3-yl)benzamide (3q)**

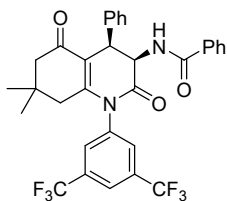

Purified by silica gel column chromatography (Petroleum ether/EtOAc = 2/1); white solid; 54.0 mg, 90% yield; >99:1 dr; M.P.: 253.4-253.9 °C; <sup>1</sup>H NMR (400 MHz, CDCl<sub>3</sub>) δ 8.02 (s, 1H), 7.83 (s, 1H), 7.65 (dd, *J* = 8.8, 7.4 Hz, 3H), 7.48 (m, 1H), 7.38 (dd, *J* = 10.5, 4.6 Hz, 2H), 7.36-7.32 (m, 1H), 7.32-7.26 (m, 2H), 7.24-7.10 (m, 2H), 6.45 (d, *J* = 7.2 Hz, 1H), 5.48 (t, *J* = 7.4 Hz, 1H), 4.90 (d, *J* = 7.5 Hz, 1H), 2.34 (s, 2H), 2.19 (d, *J* = 17.4 Hz, 1H), 2.05 (d, *J* = 17.3 Hz, 1H), 1.11 (s, 3H), 1.05 (s, 3H); <sup>13</sup>C NMR{<sup>1</sup>H} (101 MHz, CDCl<sub>3</sub>) δ 194.7, 169.6, 167.3, 150.1, 138.2, 135.7, 133.7, 133.3, 132.0, 130.3, 129.2, 128.7, 128.2, 127.9, 127.1, 123.2 (d, *J* = 3.0 Hz), 121.6 (q, *J* = 271.3 Hz), 119.2, 53.7, 50.0, 41.8, 38.7, 33.4, 28.8, 27.7; <sup>19</sup>F NMR (377 MHz, CDCl<sub>3</sub>) δ -62.79; FTIR (cm<sup>-1</sup>): 3440, 2963, 2926, 1731, 1654, 1623, 1555, 1495, 1370, 1280, 1183, 1143, 814, 740, 700; HRMS (ESI-TOF) *m/z*: [M + H]<sup>+</sup> calcd for C<sub>32</sub>H<sub>27</sub>F<sub>6</sub>N<sub>2</sub>O<sub>3</sub> 601.1920, found 601.1929.

***N*-(7,7-dimethyl-2,5-dioxo-1,4-diphenyl-1,2,3,4,5,6,7,8-octahydroquinolin-3-yl)benzamide (3r)**

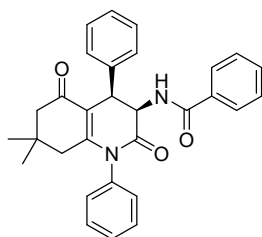

Purified by silica gel column chromatography (Petroleum ether/EtOAc = 2/1); white solid; 39.9 mg, 86% yield; >99:1 dr; M.P.: 231.9-232.2 °C; <sup>1</sup>H NMR (400 MHz, CDCl<sub>3</sub>) δ 7.70-7.61 (m, 2H), 7.59-7.48 (m, 3H), 7.46 (dt, *J* = 2.4, 1.6 Hz, 1H), 7.37 (dd, *J* = 10.4, 4.6 Hz, 2H), 7.33-7.27 (m, 2H), 7.26 (d, *J* = 1.7 Hz, 3H), 7.24 (d, *J* = 4.1 Hz, 2H), 6.53 (d, *J* = 6.8 Hz, 1H), 5.44-5.37 (m, 1H), 4.91 (d, *J* = 7.6 Hz, 1H), 2.32 (t, *J* = 9.6 Hz, 2H), 2.27-2.17 (m, 1H), 2.10 (d, *J* = 17.6 Hz, 1H), 1.08 (s, 3H), 1.01 (s, 3H); <sup>13</sup>C NMR{<sup>1</sup>H} (101 MHz, CDCl<sub>3</sub>) δ 195.1, 169.4, 167.3, 152.1, 136.7, 136.3, 134.0, 131.8, 130.0, 129.9, 129.4, 129.3, 129.0, 129.0, 128.6, 128.2, 127.8, 127.1, 117.7, 54.0, 50.2, 41.7, 38.6, 33.1, 28.7, 27.9; FTIR (cm<sup>-1</sup>): 3452, 2981, 2953, 1717, 1660, 1637, 1535, 1487, 1441, 1379, 1240, 1186, 1143, 1070, 740, 698; HRMS (ESI-TOF) *m/z*: [M + H]<sup>+</sup> calcd for C<sub>30</sub>H<sub>29</sub>N<sub>2</sub>O<sub>3</sub> 465.2173, found 465.2183.

***N*-(7,7-dimethyl-1-(naphthalen-1-yl)-2,5-dioxo-4-phenyl-1,2,3,4,5,6,7,8-octahydroquinolin-3-yl)benzamide (3s)**

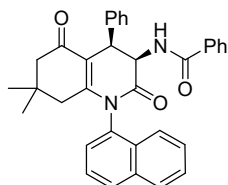

Purified by silica gel column chromatography (Petroleum ether/EtOAc = 3/1); white solid; 43.2 mg, 84% yield; >99:1 dr; M.P.: 225.4-226.1 °C; <sup>1</sup>H NMR (400 MHz, CDCl<sub>3</sub>) δ 8.03-7.93 (m, 2H), 7.68-7.63 (m, 3H), 7.63-7.54 (m, 3H), 7.49-7.42 (m, 2H), 7.39-7.33 (m, 3H), 7.33-7.23 (m, 4H), 6.60 (d, *J* = 6.5 Hz, 1H), 5.61 (dd, *J* = 7.6, 6.7 Hz, 1H), 5.04 (d, *J* = 7.6 Hz, 1H), 2.32 (t, *J* = 11.0 Hz, 2H), 2.23 (d, *J* = 17.6 Hz, 1H), 1.95 (d, *J* = 17.5 Hz, 1H), 1.01 (s, 3H), 0.93 (s, 3H); <sup>13</sup>C NMR {<sup>1</sup>H} (101 MHz, CDCl<sub>3</sub>) δ 195.1, 169.4, 167.4, 152.8, 136.4, 134.6, 133.9, 133.4, 131.8, 130.6, 130.2, 129.0, 129.0, 128.6, 128.3, 128.2, 127.9, 127.1, 127.1, 126.4, 125.6, 121.6, 117.4, 54.2, 50.3, 40.6, 38.8, 33.1, 28.7, 27.5; FTIR (cm<sup>-1</sup>): 3417, 2958, 2929, 1705, 1669, 1657, 1541, 1512, 1490, 1373, 1246, 805, 780, 737, 700; HRMS (ESI-TOF) *m/z*: [M + H]<sup>+</sup> calcd for C<sub>34</sub>H<sub>31</sub>N<sub>2</sub>O<sub>3</sub> 515.2329, found 515.2331.

***N*-(7,7-dimethyl-2,5-dioxo-4-phenyl-1-(pyridin-3-yl)-1,2,3,4,5,6,7,8-octahydroquinolin-3-yl)benzamide (3t)**

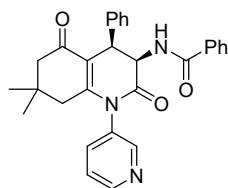

Purified by silica gel column chromatography (Petroleum ether/EtOAc = 2/1); white solid; 38.1 mg, 82% yield; >99:1 dr; M.P.: 232.9-233.4 °C; <sup>1</sup>H NMR (400 MHz, CDCl<sub>3</sub>) δ 8.70 (d, *J* = 2.2 Hz, 1H), 8.55 (d, *J* = 2.0 Hz, 1H), 7.65 (dd, *J* = 11.2, 10.0 Hz, 3H), 7.48 (t, *J* = 7.4 Hz, 2H), 7.38 (t, *J* = 7.6 Hz, 2H), 7.30 (dd, *J* = 14.0, 6.6 Hz, 3H), 7.25-7.17 (m, 2H), 6.53 (d, *J* = 7.1 Hz, 1H), 5.46 (t, *J* = 7.3 Hz, 1H), 4.90 (s, 1H), 2.38-2.29 (m, 2H), 2.28-2.01 (m, 2H), 1.09 (s, 3H), 1.02 (s, 3H); <sup>13</sup>C NMR {<sup>1</sup>H} (101 MHz, CDCl<sub>3</sub>) δ 194.9, 169.6, 167.3, 151.1, 150.4, 150.2, 148.7, 137.1, 135.9, 133.8,

133.5, 131.9, 129.1, 128.6, 128.1, 127.1, 124.4, 118.3, 53.9, 50.1, 41.9, 38.7, 33.3, 28.9, 27.8; FTIR (cm<sup>-1</sup>): 3433, 2960, 2933, 1714, 1673, 1625, 1520, 1481, 1380, 1248, 1195, 1162, 740, 720; HRMS (ESI-TOF) m/z: [M + H]<sup>+</sup> calcd for C<sub>29</sub>H<sub>28</sub>N<sub>3</sub>O<sub>3</sub> 466.2125, found 466.2132.

***N-(7,7-dimethyl-1-(3-methyl-1-phenyl-1H-pyrazol-5-yl)-2,5-dioxo-4-phenyl-1,2,3,4,5,6,7,8-octahydroquinolin-3-yl)benzamide (major diastereomer of 3u)***

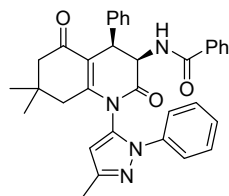

Purified by silica gel column chromatography (Petroleum ether/EtOAc = 2/1); white solid; 42.4 mg, 78% total yield; 60:40 dr; M.P.: 219.6-221.2 °C; <sup>1</sup>H NMR (400 MHz, CDCl<sub>3</sub>) δ 7.63 (dt, *J* = 8.4, 4.3 Hz, 2H), 7.59-7.48 (m, 2H), 7.48-7.42 (m, 2H), 7.40 (dd, *J* = 7.9, 2.0 Hz, 2H), 7.38-7.31 (m, 2H), 7.28 (dd, *J* = 6.1, 4.4 Hz, 1H), 7.21-7.04 (m, 3H), 6.72 (d, *J* = 7.2 Hz, 1H), 6.44 (d, *J* = 6.5 Hz, 1H), 6.32 (s, 1H), 5.13 (dd, *J* = 7.5, 6.7 Hz, 1H), 4.84 (d, *J* = 7.6 Hz, 1H), 2.45 (s, 3H), 2.29 (d, *J* = 6.5 Hz, 1H), 2.26-2.12 (m, 2H), 1.98 (d, *J* = 7.5 Hz, 1H), 1.02 (s, 3H), 0.95 (s, 3H); <sup>13</sup>C NMR {<sup>1</sup>H} (101 MHz, CDCl<sub>3</sub>) δ 194.7, 169.5, 167.2, 151.2, 150.0, 138.0, 135.8, 133.9, 131.9, 129.7, 129.0, 128.6, 128.2, 128.0, 127.1, 126.0, 123.5, 118.1, 116.0, 105.9, 54.3, 50.1, 40.3, 38.6, 33.1, 28.7, 27.5, 14.3; FTIR (cm<sup>-1</sup>): 3435, 2955, 2929, 1725, 1666, 1649, 1632, 1561, 1504, 1484, 1373, 1231, 1095, 1072, 766, 698; HRMS (ESI-TOF) m/z: [M + H]<sup>+</sup> calcd for C<sub>34</sub>H<sub>33</sub>N<sub>4</sub>O<sub>3</sub> 545.2547, found 545.2560.

***N-(7,7-dimethyl-1-(3-methyl-1-phenyl-1H-pyrazol-5-yl)-2,5-dioxo-4-phenyl-1,2,3,4,5,6,7,8-octahydroquinolin-3-yl)benzamide (minor diastereomer of 3u)***

<sup>1</sup>H NMR (400 MHz, CDCl<sub>3</sub>) δ 7.63 (dt, *J* = 8.4, 4.3 Hz, 1.2H), 7.59-7.48 (m, 1.3H), 7.48-7.42 (m, 1.2H), 7.40 (dd, *J* = 7.9, 2.0 Hz, 1.3H), 7.38-7.31 (m, 1.2H), 7.28 (dd, *J* = 6.1, 4.4 Hz, 0.7H), 7.21-7.04 (m, 1H), 6.72 (d, *J* = 7.2 Hz, 0.4H), 6.35 (d, *J* = 7.4 Hz, 0.6H), 6.16 (s, 0.6H), 5.45 (dd, *J* = 8.2, 7.6 Hz, 0.6H), 4.72 (d, *J* = 8.0 Hz, 0.6H), 2.40 (s, 1.8H), 2.33 (d, *J* = 4.7 Hz, 0.8H), 2.26-2.12 (m, 1.2H), 1.94 (d, *J* = 7.0 Hz, 0.7H),

1.09 (s, 1.8H), 0.84 (s, 1.7H);  $^{13}\text{C}$  NMR  $\{^1\text{H}\}$  (101 MHz,  $\text{CDCl}_3$ )  $\delta$  194.9, 170.4, 167.4, 151.0, 149.8, 137.9, 136.0, 134.6, 133.7, 129.7, 129.3, 128.9, 128.0, 127.6, 127.1, 126.0, 123.5, 118.1, 116.0, 105.9, 53.8, 49.9, 40.5, 39.1, 32.7, 29.2, 27.5, 14.2; FTIR ( $\text{cm}^{-1}$ ): 3435, 2955, 2929, 1725, 1666, 1649, 1632, 1561, 1504, 1484, 1373, 1231, 1095, 1072, 766, 698; HRMS (ESI-TOF)  $m/z$ :  $[\text{M} + \text{H}]^+$  calcd for  $\text{C}_{34}\text{H}_{33}\text{N}_4\text{O}_3$  545.2547, found 545.2560.

***N*-(1-benzyl-7,7-dimethyl-2,5-dioxo-4-phenyl-1,2,3,4,5,6,7,8-octahydroquinolin-3-yl)benzamide (3v)**

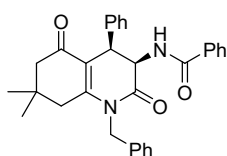

Purified by silica gel column chromatography (Petroleum ether/EtOAc = 3/1); white solid; 34.4 mg, 72% total yield; 89:11 dr; M.P.: 204.6-205.1 °C;  $^1\text{H}$  NMR (400 MHz,  $\text{CDCl}_3$ )  $\delta$  7.72-7.65 (m, 2H), 7.52-7.45 (m, 1H), 7.44-7.40 (m, 2H), 7.40-7.37 (m, 2H), 7.37-7.35 (m, 1H), 7.35-7.31 (m, 1H), 7.30-7.27 (m, 2H), 7.19 (dd,  $J$  = 6.2, 2.5 Hz, 1H), 7.17-7.13 (m, 1H), 6.98 (dd,  $J$  = 7.8, 1.3 Hz, 2H), 6.61 (d,  $J$  = 6.7 Hz, 1H), 5.25 (dd,  $J$  = 15.1, 8.0 Hz, 2H), 4.88 (dd,  $J$  = 15.9, 4.3 Hz, 1H), 4.82 (d,  $J$  = 7.7 Hz, 1H), 2.74 (d,  $J$  = 17.2 Hz, 1H), 2.52 (d,  $J$  = 17.2 Hz, 1H), 2.30-2.19 (m, 2H), 1.13 (s, 3H), 1.00 (s, 3H);  $^{13}\text{C}$  NMR  $\{^1\text{H}\}$  (101 MHz,  $\text{CDCl}_3$ )  $\delta$  194.8, 169.8, 167.3, 151.9, 136.4, 135.7, 134.0, 131.8, 129.0, 128.7, 128.6, 128.4, 128.1, 127.7, 127.6, 127.1, 117.8, 53.6, 49.8, 46.3, 40.3, 38.2, 33.0, 29.0, 27.7; FTIR ( $\text{cm}^{-1}$ ): 3426, 2960, 2929, 1714, 1663, 1652, 1623, 1518, 1456, 1390, 1246, 1192, 1128, 1084, 703; HRMS (ESI-TOF)  $m/z$ :  $[\text{M} + \text{H}]^+$  calcd for  $\text{C}_{31}\text{H}_{31}\text{N}_2\text{O}_3$  479.2329, found 479.2335.

***N*-(7-methyl-2,5-dioxo-4-phenyl-1-(*p*-tolyl)-1,2,3,4,5,6,7,8-octahydroquinolin-3-yl)benzamide (3x)**

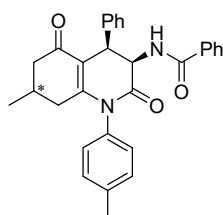



Purified by silica gel column chromatography (Petroleum ether/EtOAc = 2/1); white solid; 40.8 mg, 88% total yield; M.P.: 232.2-234.1 °C; <sup>1</sup>H NMR (400 MHz, CDCl<sub>3</sub>) δ 7.68-7.62 (m, 2H), 7.47 (t, *J* = 7.4 Hz, 1H), 7.37 (t, *J* = 7.6 Hz, 2H), 7.35-7.28 (m, 3H), 7.26 (dd, *J* = 6.4, 4.6 Hz, 2H), 7.25-7.18 (m, 3H), 7.14 (t, *J* = 6.6 Hz, 2H), 6.53 (d, *J* = 6.7 Hz, 1H), 5.37 (t, *J* = 7.2 Hz, 1H), 4.86 (d, *J* = 7.6 Hz, 1H), 2.51 (dd, *J* = 16.5, 3.1 Hz, 1H), 2.44 (s, 3H), 2.36-2.26 (m, 1H), 2.19 (dd, *J* = 17.6, 4.2 Hz, 1H), 2.08 (m, 2H), 1.00 (d, *J* = 6.5 Hz, 3H); <sup>13</sup>C NMR{<sup>1</sup>H} (101 MHz, CDCl<sub>3</sub>) δ 195.2, 169.3, 167.3, 153.7, 139.4, 136.4, 134.0, 133.8, 131.7, 130.5, 130.5, 129.1, 128.9, 128.6, 128.2, 127.8, 127.3, 127.1, 118.7, 53.9, 44.8, 38.9, 36.4, 30.1, 21.3, 21.2; FTIR (cm<sup>-1</sup>): 3400, 2955, 2923, 1714, 1669, 1646, 1620, 1521, 1487, 1379, 1336, 1234, 723, 700; HRMS (ESI-TOF) *m/z*: [M + Na]<sup>+</sup> calcd for C<sub>30</sub>H<sub>28</sub>N<sub>2</sub>NaO<sub>3</sub> 487.1992, found 487.1992.

***N*-(2,5-dioxo-4,7-diphenyl-1-(*p*-tolyl)-1,2,3,4,5,6,7,8-octahydroquinolin-3-yl)benzamide (major diastereomer of 3y)**

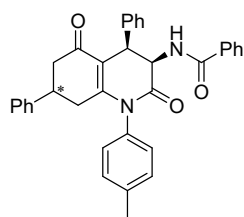

Purified by silica gel column chromatography (Petroleum ether/EtOAc = 2/1); white solid; 42.6 mg, 81% total yield; 63:37 dr; M.P.: 146.6-147.4 °C; <sup>1</sup>H NMR (400 MHz, CDCl<sub>3</sub>) δ 7.70-7.63 (m, 2H), 7.47 (t, *J* = 7.4 Hz, 1H), 7.38 (t, *J* = 7.6 Hz, 2H), 7.36-7.31 (m, 2H), 7.30 (dd, *J* = 6.1, 2.7 Hz, 3H), 7.27 (m, 3H), 7.22 (dd, *J* = 7.3, 5.5 Hz, 2H), 7.15 (dt, *J* = 14.7, 7.3 Hz, 3H), 7.10-7.02 (m, 1H), 6.56 (d, *J* = 6.7 Hz, 1H), 5.40 (t, *J* = 5.5 Hz, 1H), 4.99-4.90 (m, 1H), 3.36-3.26 (m, 1H), 2.77-2.62 (m, 2H), 2.62-2.43 (m, 2H), 2.38 (s, 3H); <sup>13</sup>C NMR{<sup>1</sup>H} (101 MHz, CDCl<sub>3</sub>) δ 194.5, 169.7, 167.3, 153.3, 142.2, 139.6, 136.4, 134.0, 133.5, 131.8, 130.8, 130.7, 128.9, 128.9, 128.6, 128.2, 127.9, 127.6, 127.3, 127.1, 126.8, 126.8, 118.0, 54.0, 43.7, 39.2, 38.5, 34.9, 21.3; FTIR (cm<sup>-1</sup>): 3437, 2952, 2921, 1720, 1669, 1654, 1623, 1564, 1507, 1487, 1382, 1359, 1246, 1186, 757, 703; HRMS (ESI-TOF) *m/z*: [M + H]<sup>+</sup> calcd for

C<sub>35</sub>H<sub>31</sub>N<sub>2</sub>O<sub>3</sub> 527.2329, found 527.2329.

***N*-(2,5-dioxo-4,7-diphenyl-1-(*p*-tolyl)-1,2,3,4,5,6,7,8-octahydroquinolin-3-yl)benzamide (minor diastereomer of 3y)**

<sup>1</sup>H NMR (400 MHz, CDCl<sub>3</sub>) δ 7.70-7.63 (m, 1.3H), 7.47 (t, *J* = 7.4 Hz, 0.7H), 7.38 (t, *J* = 7.6 Hz, 1.3H), 7.36-7.31 (m, 1.3H), 7.30 (dd, *J* = 6.1, 2.7 Hz, 2H), 7.27 (m, 2H), 7.22 (dd, *J* = 7.3, 5.5 Hz, 1.3H), 7.15 (dt, *J* = 14.7, 7.3 Hz, 2H), 7.10-7.02 (m, 0.7H), 6.56 (d, *J* = 6.7 Hz, 0.6H), 5.45-5.42 (m, 0.7H), 4.99-4.90 (m, 0.6H), 3.48 (m, 0.7H), 2.77-2.62 (m, 1.5H), 2.62-2.43 (m, 1.1H), 2.38 (s, 2H); <sup>13</sup>C NMR{<sup>1</sup>H} (101 MHz, CDCl<sub>3</sub>) δ 194.3, 169.3, 167.3, 153.3, 142.2, 139.5, 136.2, 134.0, 133.5, 131.8, 130.7, 130.5, 129.0, 128.9, 128.9, 128.6, 128.2, 127.8, 127.6, 127.3, 127.2, 126.8, 118.9, 54.0, 43.2, 40.7, 39.0, 36.2, 21.3. FTIR (cm<sup>-1</sup>): 3437, 2952, 2921, 1720, 1669, 1654, 1623, 1564, 1507, 1487, 1382, 1359, 1246, 1186, 757, 703; HRMS (ESI-TOF) *m/z*: [M + H]<sup>+</sup> calcd for C<sub>35</sub>H<sub>31</sub>N<sub>2</sub>O<sub>3</sub> 527.2329; found 527.2329.

***N*-(6,6-dimethyl-2,5-dioxo-4-phenyl-1-(*p*-tolyl)-1,2,3,4,5,6,7,8-octahydroquinolin-3-yl)benzamide (3z)**

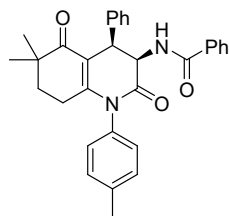

Purified by silica gel column chromatography (Petroleum ether/EtOAc = 3/1); white solid; 41.4 mg, 85% yield; >99:1 dr; M.P.: 136.6-134.7 °C; <sup>1</sup>H NMR (400 MHz, CDCl<sub>3</sub>) δ 7.70-7.61 (m, 2H), 7.47 (dd, *J* = 10.5, 4.2 Hz, 1H), 7.36 (dd, *J* = 16.3, 9.0 Hz, 3H), 7.32-7.28 (m, 2H), 7.28-7.23 (m, 2H), 7.23-7.19 (m, 2H), 7.16-7.10 (m, 2H), 6.52 (d, *J* = 6.8 Hz, 1H), 5.38 (t, *J* = 7.2 Hz, 1H), 4.87 (d, *J* = 7.6 Hz, 1H), 2.42 (s, 3H), 2.40-2.32 (m, 1H), 2.21 (dt, *J* = 9.8, 5.1 Hz, 1H), 1.92 (m, 1H), 1.78 (dt, *J* = 13.4, 5.5 Hz, 1H), 1.15 (s, 3H), 1.05 (s, 3H); <sup>13</sup>C NMR{<sup>1</sup>H} (101 MHz, CDCl<sub>3</sub>) δ 199.9, 169.2, 167.3, 152.3, 139.4, 136.5, 134.1, 133.9, 131.7, 130.6, 130.5, 129.0, 128.9, 128.6, 128.1, 127.7, 127.5, 127.1, 116.8, 54.0, 39.6, 39.1, 35.2, 25.0, 24.7, 23.8, 21.3;

FTIR (cm<sup>-1</sup>): 3423, 2960, 2926, 1711, 1669, 1652, 1626, 1544, 1512, 1484, 1373, 1351, 1251, 1149, 717; HRMS (ESI-TOF) m/z: [M + Na]<sup>+</sup> calcd for C<sub>31</sub>H<sub>30</sub>N<sub>2</sub>NaO<sub>3</sub> 501.2149, found 501.2148.

***N*-(2,5-dioxo-4-phenyl-1-(*p*-tolyl)-1,2,3,4,5,6,7,8-octahydroquinolin-3-yl)benzamide (3a')**

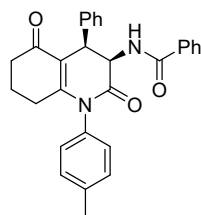

Purified by silica gel column chromatography (Petroleum ether/EtOAc = 1/1); white solid; 37.4 mg, 83% yield; >99:1 dr; M.P.: 204.6-205.1 °C; <sup>1</sup>H NMR (400 MHz, CDCl<sub>3</sub>) δ 7.70-7.61 (m, 2H), 7.46 (t, *J* = 7.4 Hz, 1H), 7.37 (d, *J* = 7.8 Hz, 2H), 7.35-7.31 (m, 2H), 7.29 (d, *J* = 7.5 Hz, 2H), 7.24 (dd, *J* = 8.8, 4.9 Hz, 3H), 7.17-7.07 (m, 2H), 6.55 (d, *J* = 6.7 Hz, 1H), 5.38 (t, *J* = 7.2 Hz, 1H), 4.89 (d, *J* = 7.6 Hz, 1H), 2.50-2.37 (m, 5H), 2.36-2.18 (m, 2H), 2.10-1.93 (m, 2H); <sup>13</sup>C NMR{<sup>1</sup>H} (101 MHz, CDCl<sub>3</sub>) δ 195.2, 169.3, 167.3, 154.3, 139.4, 136.4, 134.0, 134.0, 131.8, 130.6, 130.5, 128.9, 128.9, 128.6, 128.2, 127.8, 127.5, 127.1, 118.6, 54.0, 38.8, 36.6, 28.2, 21.9, 21.3; FTIR (cm<sup>-1</sup>): 3417, 2949, 2923, 1714, 1660, 1623, 1512, 1484, 1373, 1246, 1177, 800, 706; HRMS (ESI-TOF) m/z: [M + H]<sup>+</sup> calcd for C<sub>29</sub>H<sub>27</sub>N<sub>2</sub>O<sub>3</sub> 451.2016, found 451.2015.

***N*-(7,7-dimethyl-2,5-dioxo-1,4-di-*p*-tolyl-1,2,3,4,5,6,7,8-octahydroquinolin-3-yl)benzamide (4b)**

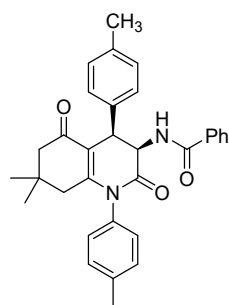

Purified by silica gel column chromatography (Petroleum ether/EtOAc = 2/1); white solid; 41.3 mg, 84% yield; >99:1 dr; M.P.: 273.8-275.2 °C; <sup>1</sup>H NMR (400 MHz, CDCl<sub>3</sub>) δ 7.69-7.65 (m, 2H), 7.49-7.43 (m, 1H), 7.37 (dd, *J* = 10.4, 4.6 Hz, 2H), 7.32 (t, *J* = 7.2 Hz, 2H), 7.14-7.11 (m, 3H), 7.09 (d, *J* = 8.2 Hz, 3H), 6.54 (d, *J* = 6.9 Hz, 1H), 5.36 (t, *J* = 7.3 Hz, 1H), 4.84 (d, *J* = 7.5 Hz, 1H), 2.43 (s, 3H), 2.29 (s, 3H), 2.28 (s, 2H), 2.22 (d, *J* = 17.6 Hz, 1H), 2.10 (d, *J* = 17.5 Hz, 1H), 1.07 (s, 3H), 1.00 (s, 3H); <sup>13</sup>C NMR{<sup>1</sup>H} (101 MHz, CDCl<sub>3</sub>) δ 195.1, 169.6, 167.3, 152.2, 139.3, 137.4, 134.1, 134.0, 133.2, 131.7, 130.6, 130.5, 129.7, 129.0, 128.6, 128.0, 127.5, 127.1, 117.7, 54.0, 50.2, 41.6, 38.2, 33.1, 28.7, 27.9, 21.3, 21.1; FTIR (cm<sup>-1</sup>): 3432, 2960, 2926, 1714, 1663, 1652, 1610, 1512, 1484, 1373, 1260, 1183, 825, 715; HRMS (ESI-TOF) *m/z*: [M + H]<sup>+</sup> calcd for C<sub>32</sub>H<sub>33</sub>N<sub>2</sub>O<sub>3</sub> 493.2486, found 493.2493.

***N*-(7,7-dimethyl-2,5-dioxo-1-(*p*-tolyl)-4-(4-(trifluoromethoxy)phenyl)-1,2,3,4,5,6,7,8-octahydroquinolin-3-yl)benzamide (4c)**

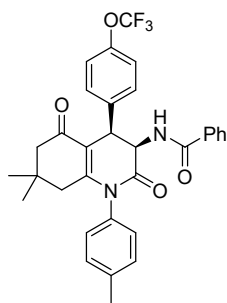

Purified by silica gel column chromatography (Petroleum ether/EtOAc = 2/1); white solid; 48.3 mg, 86% yield; >99:1 dr; M.P.: 167.6-168.0 °C; <sup>1</sup>H NMR (400 MHz, CDCl<sub>3</sub>) δ 7.69-7.60 (m, 2H), 7.52-7.45 (m, 1H), 7.39 (dd, *J* = 10.5, 4.6 Hz, 2H), 7.34 (t, *J* = 6.6 Hz, 2H), 7.27-7.22 (m, 2H), 7.12 (t, *J* = 8.1 Hz, 3H), 7.08 (d, *J* = 8.4 Hz, 1H), 6.66 (d, *J* = 6.1 Hz, 1H), 5.33 (dd, *J* = 7.7, 6.2 Hz, 1H), 4.99 (d, *J* = 7.7 Hz, 1H), 2.44 (s, 3H), 2.32 (t, *J* = 10.2 Hz, 2H), 2.24 (d, *J* = 17.6 Hz, 1H), 2.11 (d, *J* = 17.5 Hz, 1H), 1.08 (s, 3H), 1.01 (s, 3H); <sup>13</sup>C NMR{<sup>1</sup>H} (101 MHz, CDCl<sub>3</sub>) δ 195.1, 169.3, 167.4, 152.4, 148.7, 139.6, 135.3, 133.8, 133.7, 131.9, 130.8, 130.6, 129.6, 128.9, 128.7, 127.4, 127.0, 121.3, 120.4 (q, *J* = 258.2 Hz), 117.2, 54.1, 50.1, 41.6, 37.8, 33.1, 28.7, 27.9, 21.3; <sup>19</sup>F NMR (377 MHz, CDCl<sub>3</sub>) δ -57.75; FTIR (cm<sup>-1</sup>): 3432, 2960,

2929, 1717, 1671, 1640, 1515, 1490, 1371, 1277, 797, 720; HRMS (ESI-TOF) m/z: [M + H]<sup>+</sup> calcd for C<sub>32</sub>H<sub>30</sub>F<sub>3</sub>N<sub>2</sub>O<sub>4</sub> 563.2152, found 563.2155.

***N*-(7,7-dimethyl-2,5-dioxo-1-(*p*-tolyl)-4-(4-(trifluoromethyl)phenyl)-1,2,3,4,5,6,7,8-octahydroquinolin-3-yl)benzamide (4d)**

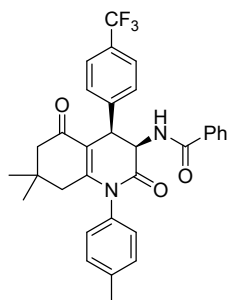

Purified by silica gel column chromatography (Petroleum ether/EtOAc = 2/1); white solid; 51.3 mg, 94% yield; >99:1 dr; M.P.: 227.0-228.9 °C; <sup>1</sup>H NMR (400 MHz, CDCl<sub>3</sub>) δ 7.70-7.63 (m, 2H), 7.54 (d, *J* = 8.1 Hz, 2H), 7.50-7.44 (m, 1H), 7.39 (d, *J* = 7.8 Hz, 2H), 7.36 (d, *J* = 2.3 Hz, 2H), 7.33 (d, *J* = 7.3 Hz, 2H), 7.10 (t, *J* = 8.1 Hz, 2H), 6.72 (d, *J* = 5.9 Hz, 1H), 5.35 (dd, *J* = 7.7, 6.0 Hz, 1H), 5.05 (d, *J* = 7.7 Hz, 1H), 2.43 (s, 3H), 2.35-2.26 (m, 2H), 2.23 (d, *J* = 8.4 Hz, 1H), 2.13 (d, *J* = 17.8 Hz, 1H), 1.08 (s, 3H), 1.00 (s, 3H); <sup>13</sup>C NMR{<sup>1</sup>H} (101 MHz, CDCl<sub>3</sub>) δ 195.1, 169.2, 167.4, 152.7, 140.9, 139.6, 133.7, 132.0, 130.8, 130.6, 130.0, 129.7, 128.9, 128.7, 128.6, 127.4, 127.1, 125.8 (d, *J* = 4.0 Hz), 124.1 (q, *J* = 273.0 Hz), 116.9, 54.0, 50.1, 41.6, 38.3, 33.1, 28.6, 28.0, 21.3; <sup>19</sup>F NMR (377 MHz, CDCl<sub>3</sub>) δ -62.48; FTIR (cm<sup>-1</sup>): 3476, 2960, 2921, 1711, 1666, 1643, 1515, 1493, 1370, 1331, 1240, 791, 698; HRMS (ESI-TOF) m/z: [M + H]<sup>+</sup> calcd for C<sub>32</sub>H<sub>30</sub>F<sub>3</sub>N<sub>2</sub>O<sub>3</sub> 547.2203, found 547.2207.

***N*-(4-(4-fluorophenyl)-7,7-dimethyl-2,5-dioxo-1-(*p*-tolyl)-1,2,3,4,5,6,7,8-octahydroquinolin-3-yl)benzamide (4e)**

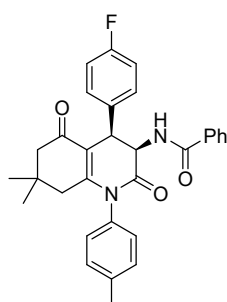

Purified by silica gel column chromatography (Petroleum ether/EtOAc = 2/1); white solid; 44.6 mg, 90% yield; >99:1 dr; M.P.: 252.8-253.1 °C; <sup>1</sup>H NMR (400 MHz, CDCl<sub>3</sub>) δ 7.70-7.62 (m, 2H), 7.51-7.44 (m, 1H), 7.38 (dd, *J* = 10.5, 4.6 Hz, 2H), 7.33 (t, *J* = 7.1 Hz, 2H), 7.22-7.16 (m, 2H), 7.09 (t, *J* = 8.9 Hz, 2H), 7.01-6.93 (m, 2H), 6.63 (d, *J* = 6.3 Hz, 1H), 5.32 (dd, *J* = 7.6, 6.4 Hz, 1H), 4.93 (d, *J* = 7.6 Hz, 1H), 2.43 (s, 3H), 2.30 (t, *J* = 9.9 Hz, 2H), 2.26-2.19 (m, 1H), 2.11 (d, *J* = 17.6 Hz, 1H), 1.07 (s, 3H), 1.00 (s, 3H); <sup>13</sup>C NMR {<sup>1</sup>H} (101 MHz, CDCl<sub>3</sub>) δ 195.1, 169.4, 167.3, 162.3 (d, *J* = 247.5 Hz), 152.3, 139.5, 133.9, 132.2, 131.9, 130.7, 129.8, 129.7, 128.9, 128.7, 127.4, 127.0, 117.4, 115.9, 115.7, 54.1, 50.1, 41.6, 37.7, 33.1, 28.7, 27.9, 21.3; <sup>19</sup>F NMR (377 MHz, CDCl<sub>3</sub>): δ -114.66; FTIR (cm<sup>-1</sup>): 3452, 2968, 2918, 1708, 1660, 1640, 1609, 1515, 1453, 1376, 1250, 815, 808, 720, 715; HRMS (ESI-TOF) *m/z*: [M + H]<sup>+</sup> calcd for C<sub>31</sub>H<sub>30</sub>FN<sub>2</sub>O<sub>3</sub> 497.2235, found 497.2235.

***N*-(4-(4-chlorophenyl)-7,7-dimethyl-2,5-dioxo-1-(*p*-tolyl)-1,2,3,4,5,6,7,8-octahydroquinolin-3-yl)benzamide (4f)**

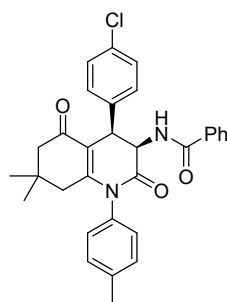

Purified by silica gel column chromatography (Petroleum ether/EtOAc = 2/1); white solid; 46.6 mg, 91% yield; >99:1 dr; M.P.: 263.7-264.5 °C; <sup>1</sup>H NMR (400 MHz, CDCl<sub>3</sub>) δ 7.71-7.62 (m, 2H), 7.51-7.44 (m, 1H), 7.38 (t, *J* = 7.5 Hz, 2H), 7.32 (t, *J* = 6.4 Hz, 2H), 7.26 (d, *J* = 1.9 Hz, 1H), 7.24 (d, *J* = 1.8 Hz, 1H), 7.16 (d, *J* = 8.5 Hz, 2H), 7.09 (dd, *J* = 11.0, 8.9 Hz, 2H), 6.68 (d, *J* = 6.2 Hz, 1H), 5.32 (dd, *J* = 7.6, 6.3 Hz, 1H), 4.93 (d, *J* = 7.6 Hz, 1H), 2.42 (s, 3H), 2.29 (t, *J* = 10.2 Hz, 2H), 2.25-2.19 (m, 1H), 2.11 (d, *J* = 17.7 Hz, 1H), 1.07 (s, 3H), 0.99 (s, 3H); <sup>13</sup>C NMR {<sup>1</sup>H} (101 MHz, CDCl<sub>3</sub>) δ 195.0, 169.3, 167.3, 152.5, 139.5, 135.1, 133.8, 133.8, 133.5, 131.9, 130.7, 130.6, 129.6, 129.0, 128.9, 128.7, 127.4, 127.1, 117.2, 54.0, 50.1, 41.6, 37.9, 33.1,

28.6, 27.9, 21.3; FTIR (cm<sup>-1</sup>): 3487, 2963, 2921, 1711, 1669, 1640, 1515, 1487, 1373, 1311, 777, 698; HRMS (ESI-TOF) m/z: [M + H]<sup>+</sup> calcd for C<sub>31</sub>H<sub>30</sub>ClN<sub>2</sub>O<sub>3</sub> 513.1939, found 513.1943.

***N*-[4-(4-bromophenyl)-7,7-dimethyl-2,5-dioxo-1-(*p*-tolyl)-1,2,3,4,5,6,7,8-octahydroquinolin-3-yl]benzamide (4g)**

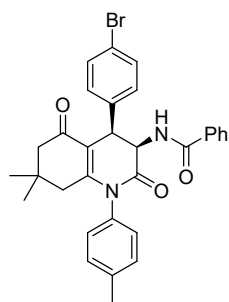

Purified by silica gel column chromatography (Petroleum ether/EtOAc = 2/1); white solid; 49.6 mg, 89% yield; >99:1 dr; M.P.: 258.4-258.5 °C; <sup>1</sup>H NMR (400 MHz, CDCl<sub>3</sub>) δ 7.70-7.65 (m, 2H), 7.47 (t, *J* = 7.4 Hz, 1H), 7.43-7.35 (m, 4H), 7.31 (s, 2H), 7.08 (t, *J* = 10.8 Hz, 4H), 6.70-6.64 (m, 1H), 5.32 (dd, *J* = 7.6, 6.3 Hz, 1H), 4.92 (d, *J* = 7.7 Hz, 1H), 2.43 (s, 3H), 2.29 (t, *J* = 10.5 Hz, 2H), 2.25-2.18 (m, 1H), 2.11 (d, *J* = 17.7 Hz, 1H), 1.07 (s, 3H), 0.99 (s, 3H); <sup>13</sup>C NMR {<sup>1</sup>H} (101 MHz, CDCl<sub>3</sub>) δ 195.0, 169.3, 167.3, 152.5, 139.5, 135.6, 133.8, 133.8, 132.0, 131.9, 130.7, 130.6, 129.9, 128.9, 128.7, 127.4, 127.1, 121.7, 117.1, 54.0, 50.1, 41.6, 38.0, 33.1, 28.6, 28.0, 21.3; FTIR (cm<sup>-1</sup>): 3418, 2964, 2927, 1707, 1667, 1639, 1606, 1545, 1520, 1448, 1372, 1240, 805, 698; HRMS (ESI-TOF) m/z: [M + H]<sup>+</sup> calcd for C<sub>31</sub>H<sub>30</sub>BrN<sub>2</sub>O<sub>3</sub> 557.1434, found 557.1437.

***N*-[4-(3-methoxyphenyl)-7,7-dimethyl-2,5-dioxo-1-(*p*-tolyl)-1,2,3,4,5,6,7,8-octahydroquinolin-3-yl]benzamide (4h)**

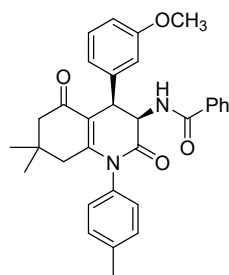

Purified by silica gel column chromatography (Petroleum ether/EtOAc = 2/1); white solid; 43.2 mg, 85% yield; >99:1 dr; M.P.: 198.1-198.7 °C; <sup>1</sup>H NMR (400 MHz, CDCl<sub>3</sub>) δ 7.70-7.65 (m, 2H), 7.46 (t, *J* = 7.4 Hz, 1H), 7.37 (t, *J* = 7.5 Hz, 2H), 7.32 (t, *J* = 7.8 Hz, 2H), 7.23-7.16 (m, 1H), 7.15-7.07 (m, 2H), 6.84-6.74 (m, 3H), 6.58 (d, *J* = 6.8 Hz, 1H), 5.36 (t, *J* = 7.2 Hz, 1H), 4.88 (d, *J* = 7.6 Hz, 1H), 3.67 (s, 3H), 2.42 (s, 3H), 2.29 (s, 2H), 2.23 (d, *J* = 17.7 Hz, 1H), 2.10 (d, *J* = 17.6 Hz, 1H), 1.07 (s, 3H), 1.01 (s, 3H); <sup>13</sup>C NMR{<sup>1</sup>H} (101 MHz, CDCl<sub>3</sub>) δ 195.1, 169.4, 167.3, 159.9, 152.4, 139.3, 137.9, 134.0, 133.9, 131.8, 130.6, 130.6, 129.8, 129.0, 128.6, 127.5, 127.1, 120.2, 117.4, 114.1, 113.4, 55.1, 54.0, 50.2, 41.6, 38.6, 33.1, 28.7, 27.9, 21.3; FTIR (cm<sup>-1</sup>): 3435, 2955, 2918, 1714, 1663, 1623, 1510, 1487, 1376, 1317, 1246, 811, 780, 720, 700; HRMS (ESI-TOF) *m/z*: [M + H]<sup>+</sup> calcd for C<sub>32</sub>H<sub>33</sub>N<sub>2</sub>O<sub>4</sub> 509.2435, found 509.2440.

***N*-(4-(3-bromophenyl)-7,7-dimethyl-2,5-dioxo-1-(*p*-tolyl)-1,2,3,4,5,6,7,8-octahydroquinolin-3-yl)benzamide (4i)**

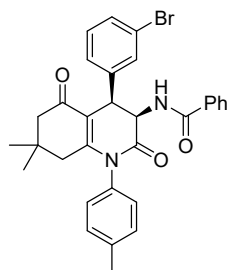

Purified by silica gel column chromatography (Petroleum ether/EtOAc = 2/1); white solid; 50.1 mg, 90% yield; >99:1 dr; M.P.: 195.1-197.2 °C; <sup>1</sup>H NMR (400 MHz, CDCl<sub>3</sub>) δ 7.71-7.65 (m, 2H), 7.47 (m, 1H), 7.41-7.37 (m, 3H), 7.37-7.28 (m, 3H), 7.17-7.07 (m, 4H), 6.65 (d, *J* = 6.3 Hz, 1H), 5.32 (dd, *J* = 7.5, 6.4 Hz, 1H), 4.91 (d, *J* = 7.6 Hz, 1H), 2.42 (s, 3H), 2.31 (d, *J* = 17.0 Hz, 2H), 2.24 (d, *J* = 17.7 Hz, 1H), 2.12 (d, *J* = 17.6 Hz, 1H), 1.07 (s, 3H), 1.00 (s, 3H); <sup>13</sup>C NMR{<sup>1</sup>H} (101 MHz, CDCl<sub>3</sub>) δ 195.0, 169.1, 167.4, 152.8, 139.5, 138.7, 133.9, 133.7, 131.9, 131.1, 130.9, 130.7, 130.4, 130.4, 128.9, 128.7, 127.4, 127.2, 127.1, 123.0, 116.9, 54.1, 50.1, 41.5, 38.1, 33.1, 28.6, 28.0, 21.3; FTIR (cm<sup>-1</sup>): 3429, 2958, 2921, 1717, 1660, 1637, 1512, 1473, 1376, 1246, 817, 771, 722, 698; HRMS (ESI-TOF) *m/z*: [M + H]<sup>+</sup> calcd for



C<sub>31</sub>H<sub>30</sub>BrN<sub>2</sub>O<sub>3</sub> 557.1434, found 557.1437.

***N*-(7,7-dimethyl-2,5-dioxo-4-(*o*-tolyl)-1-(*p*-tolyl)-1,2,3,4,5,6,7,8-octahydroquinolin-3-yl)benzamide (4j)**

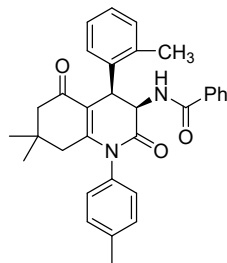

Purified by silica gel column chromatography (Petroleum ether/EtOAc = 3/1); white solid; 40.8 mg, 83% yield; >99:1 dr; M.P.: 257.4-259.0 °C; <sup>1</sup>H NMR (400 MHz, CDCl<sub>3</sub>) δ 7.61-7.56 (m, 2H), 7.48-7.42 (m, 1H), 7.34 (dd, *J* = 14.8, 7.5 Hz, 4H), 7.19 (dd, *J* = 8.0, 2.0 Hz, 1H), 7.17-7.13 (m, 3H), 7.13-7.10 (m, 2H), 6.38 (d, *J* = 7.5 Hz, 1H), 5.52 (t, *J* = 7.9 Hz, 1H), 5.10 (d, *J* = 8.2 Hz, 1H), 2.45 (s, 3H), 2.44 (s, 3H), 2.27 (dd, *J* = 11.5, 8.5 Hz, 2H), 2.22 (d, *J* = 5.6 Hz, 1H), 2.09 (d, *J* = 17.6 Hz, 1H), 1.07 (s, 3H), 0.99 (s, 3H); <sup>13</sup>C NMR{<sup>1</sup>H} (101 MHz, CDCl<sub>3</sub>) δ 195.3, 169.5, 167.8, 152.3, 139.3, 138.6, 135.8, 134.1, 134.0, 131.8, 131.0, 130.7, 130.5, 129.0, 128.6, 127.6, 127.4, 127.0, 126.6, 125.8, 118.6, 54.0, 50.1, 41.7, 34.9, 33.2, 28.8, 27.8, 21.3, 20.0; FTIR (cm<sup>-1</sup>): 3400, 2960, 2926, 1717, 1666, 1649, 1515, 1481, 1370, 1308, 1234, 817, 715; HRMS (ESI-TOF) *m/z*: [M + H]<sup>+</sup> calcd for C<sub>32</sub>H<sub>33</sub>N<sub>2</sub>O<sub>3</sub> 493.2486, found 493.2487.

***N*-(4-(2-chlorophenyl)-7,7-dimethyl-2,5-dioxo-1-(*p*-tolyl)-1,2,3,4,5,6,7,8-octahydroquinolin-3-yl)benzamide (4k)**

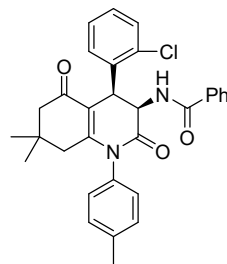

Purified by silica gel column chromatography (Petroleum ether/EtOAc = 2/1); white solid; 46.6 mg, 91% yield; >99:1 dr; M.P.: 282.5-282.7 °C; <sup>1</sup>H NMR (400 MHz,

CDCl<sub>3</sub>)  $\delta$  7.71-7.62 (m, 2H), 7.48-7.42 (m, 1H), 7.41-7.35 (m, 3H), 7.33 (dd,  $J$  = 9.9, 4.6 Hz, 2H), 7.25-7.21 (m, 2H), 7.21-7.13 (m, 2H), 7.11 (d,  $J$  = 8.0 Hz, 1H), 6.38 (d,  $J$  = 7.5 Hz, 1H), 5.57 (t,  $J$  = 7.8 Hz, 1H), 5.42 (d,  $J$  = 7.9 Hz, 1H), 2.43 (s, 3H), 2.29 (t,  $J$  = 11.8 Hz, 2H), 2.23 (d,  $J$  = 4.0 Hz, 1H), 2.12 (d,  $J$  = 17.7 Hz, 1H), 1.08 (s, 3H), 1.00 (s, 3H); <sup>13</sup>C NMR {<sup>1</sup>H} (101 MHz, CDCl<sub>3</sub>)  $\delta$  194.9, 169.2, 167.9, 153.1, 139.5, 135.8, 134.7, 134.3, 133.9, 131.6, 131.6, 130.8, 130.5, 130.4, 129.1, 128.9, 128.5, 127.8, 127.4, 127.2, 117.3, 53.7, 50.0, 41.7, 35.6, 33.1, 28.7, 27.9, 21.3; FTIR (cm<sup>-1</sup>): 3437, 2958, 2926, 1714, 1666, 1659, 1614, 1522, 1477, 1377, 1243, 820, 715; HRMS (ESI-TOF) m/z: [M + H]<sup>+</sup> calcd for C<sub>31</sub>H<sub>30</sub>ClN<sub>2</sub>O<sub>3</sub> 513.1939, found 513.1940.

***N*-(4-(2-bromophenyl)-7,7-dimethyl-2,5-dioxo-1-(*p*-tolyl)-1,2,3,4,5,6,7,8-octahydroquinolin-3-yl)benzamide (4l)**

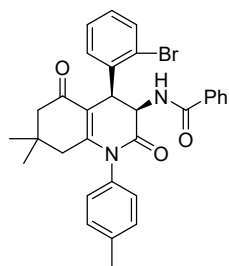

Purified by silica gel column chromatography (Petroleum ether/EtOAc = 2/1); white solid; 51.8 mg, 93% yield; >99:1 dr; M.P.: 279.3-279.5 °C; <sup>1</sup>H NMR (400 MHz, CDCl<sub>3</sub>)  $\delta$  7.70-7.63 (m, 2H), 7.59 (dd,  $J$  = 8.0, 1.1 Hz, 1H), 7.48-7.42 (m, 1H), 7.38 (d,  $J$  = 7.8 Hz, 2H), 7.35-7.30 (m, 2H), 7.29-7.24 (m, 1H), 7.21 (dd,  $J$  = 7.8, 1.8 Hz, 1H), 7.17-7.08 (m, 3H), 6.31 (d,  $J$  = 7.8 Hz, 1H), 5.59 (t,  $J$  = 7.9 Hz, 1H), 5.38 (d,  $J$  = 8.0 Hz, 1H), 2.44 (s, 3H), 2.29 (t,  $J$  = 12.1 Hz, 2H), 2.23 (d,  $J$  = 3.8 Hz, 1H), 2.12 (d,  $J$  = 17.7 Hz, 1H), 1.08 (s, 3H), 1.00 (s, 3H); <sup>13</sup>C NMR {<sup>1</sup>H} (101 MHz, CDCl<sub>3</sub>)  $\delta$  194.9, 169.2, 168.0, 153.0, 139.5, 136.6, 134.3, 133.9, 133.8, 131.6, 130.8, 130.5, 129.3, 129.0, 128.5, 128.1, 127.7, 127.4, 127.3, 126.6, 117.7, 53.6, 50.0, 41.7, 38.3, 33.1, 28.7, 27.9, 21.3; FTIR (cm<sup>-1</sup>): 3443, 2966, 2915, 1714, 1669, 1627, 1612, 1515, 1487, 1376, 1234, 837, 712; HRMS (ESI-TOF) m/z: [M + H]<sup>+</sup> calcd for C<sub>31</sub>H<sub>30</sub>BrN<sub>2</sub>O<sub>3</sub> 557.1434, found 557.1437.

***N*-(4-(4-bromo-2-fluorophenyl)-7,7-dimethyl-2,5-dioxo-1-(*p*-tolyl)-1,2,3,4,5,6,7,8-**

**octahydroquinolin-3-yl)benzamide (4m)**

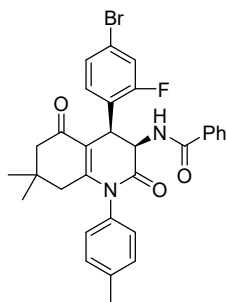

Purified by silica gel column chromatography (Petroleum ether/EtOAc = 3/1); white solid; 52.9 mg, 92% yield; >99:1 dr; M.P.: 274.4-274.8 °C; <sup>1</sup>H NMR (400 MHz, CDCl<sub>3</sub>) δ 7.65-7.60 (m, 2H), 7.49-7.42 (m, 1H), 7.40-7.28 (m, 4H), 7.21-7.17 (m, 2H), 7.17-7.11 (m, 2H), 7.09 (d, *J* = 8.0 Hz, 1H), 6.78 (d, *J* = 5.8 Hz, 1H), 5.31 (dd, *J* = 8.6, 5.8 Hz, 1H), 5.19 (d, *J* = 8.6 Hz, 1H), 2.43 (s, 3H), 2.27 (t, *J* = 10.7 Hz, 2H), 2.22-2.14 (m, 1H), 2.09 (d, *J* = 17.5 Hz, 1H), 1.05 (s, 3H), 0.97 (s, 3H); <sup>13</sup>C NMR{<sup>1</sup>H} (101 MHz, CDCl<sub>3</sub>) δ 195.2, 169.0, 167.6, 161.3 (d, *J* = 251.5 Hz), 153.1, 139.5, 133.9, 133.9, 132.5 (d, *J* = 6.1 Hz), 131.8, 130.6, 128.8, 128.6, 127.8, 127.8, 123.2 (d, *J* = 16.2 Hz), 121.8, 121.7, 119.6, 119.3, 114.6, 53.2, 50.1, 41.7, 34.8, 33.0, 28.5, 28.0, 21.3; <sup>19</sup>F NMR (377 MHz, CDCl<sub>3</sub>) δ -111.52; FTIR (cm<sup>-1</sup>): 3429, 2960, 2918, 1708, 1660, 1637, 1609, 1518, 1481, 1379, 1246, 879, 805, 700; HRMS (ESI-TOF) *m/z*: [M + H]<sup>+</sup> calcd for C<sub>31</sub>H<sub>29</sub>BrFN<sub>2</sub>O<sub>3</sub> 575.1340, found 575.1345.

***N*-(7,7-dimethyl-2,5-dioxo-4-(perfluorophenyl)-1-(*p*-tolyl)-1,2,3,4,5,6,7,8-octahydroquinolin-3-yl)benzamide (4n)**

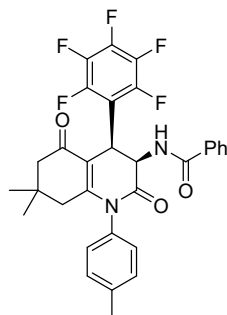

Purified by silica gel column chromatography (Petroleum ether/EtOAc = 3/1); white solid; 47.7 mg, 84% yield; >99:1 dr; M.P.: 287.7-287.9 °C; <sup>1</sup>H NMR (400 MHz, CDCl<sub>3</sub>) δ 7.66 (d, *J* = 7.3 Hz, 2H), 7.52-7.46 (m, 1H), 7.43-7.34 (m, 3H), 7.32 (d, *J* =

8.1 Hz, 1H), 7.15 (d,  $J = 8.1$  Hz, 1H), 7.07 (dd,  $J = 8.0, 2.2$  Hz, 1H), 6.84 (s, 1H), 5.47 (d,  $J = 9.4$  Hz, 1H), 5.38 (dd,  $J = 9.4, 5.5$  Hz, 1H), 2.45 (s, 3H), 2.29 (t,  $J = 12.7$  Hz, 2H), 2.23-2.12 (m, 1H), 2.08 (d,  $J = 17.8$  Hz, 1H), 1.06 (s, 3H), 0.97 (s, 3H);  $^{13}\text{C}$  NMR  $\{^1\text{H}\}$  (101 MHz,  $\text{CDCl}_3$ )  $\delta$  195.4, 168.5, 167.7, 154.2, 147.4-147.2 (m), 144.8, 139.6, 136.4-136.1 (m), 133.8, 133.4, 132.1, 130.7, 130.6, 128.7, 128.6, 128.2, 127.0, 112.2, 111.5-111.2 (m), 52.1, 49.9, 41.8, 33.0, 30.4, 28.5, 27.8, 21.3;  $^{19}\text{F}$  NMR (377 MHz,  $\text{CDCl}_3$ )  $\delta$  140.09 (t,  $J = 9.4$  Hz), 154.47 (t,  $J = 18.5$  Hz), -161.66 (d,  $J = 67.4$  Hz); FTIR ( $\text{cm}^{-1}$ ): 3417, 2960, 2921, 1711, 1660, 1635, 1617, 1524, 1489, 1382, 1248, 698; HRMS (ESI-TOF)  $m/z$ :  $[\text{M} + \text{H}]^+$  calcd for  $\text{C}_{31}\text{H}_{26}\text{F}_5\text{N}_2\text{O}_3$  569.1858, found 569.1867.

***N*-(7,7-dimethyl-4-(naphthalen-1-yl)-2,5-dioxo-1-(*p*-tolyl)-1,2,3,4,5,6,7,8-octahydroquinolin-3-yl)benzamide (4o)**

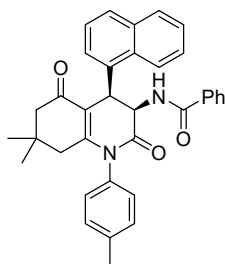

Purified by silica gel column chromatography (Petroleum ether/EtOAc = 2/1); white solid; 47.0 mg, 89% yield; >99:1 dr; M.P.: 229.8-231.2 °C;  $^1\text{H}$  NMR (400 MHz,  $\text{CDCl}_3$ )  $\delta$  8.39-8.30 (m, 1H), 7.81-7.73 (m, 2H), 7.44-7.39 (m, 2H), 7.39-7.34 (m, 3H), 7.33 (dd,  $J = 9.7, 4.5$  Hz, 2H), 7.23 (d,  $J = 9.3$  Hz, 2H), 7.21-7.18 (m, 2H), 7.14 (dd,  $J = 16.3, 8.0$  Hz, 2H), 6.18 (d,  $J = 7.4$  Hz, 1H), 5.78 (d,  $J = 7.8$  Hz, 1H), 5.65 (t,  $J = 7.6$  Hz, 1H), 2.43 (s, 3H), 2.32 (d,  $J = 15.8$  Hz, 2H), 2.28 (d,  $J = 16.6$  Hz, 1H), 2.17 (d,  $J = 17.8$  Hz, 1H), 1.11 (s, 3H), 1.04 (s, 3H);  $^{13}\text{C}$  NMR  $\{^1\text{H}\}$  (101 MHz,  $\text{CDCl}_3$ )  $\delta$  195.1, 169.2, 168.1, 153.1, 139.4, 134.0, 134.0, 134.0, 133.1, 133.0, 131.5, 130.7, 130.6, 129.0, 128.7, 128.5, 128.3, 127.6, 127.0, 126.6, 125.9, 125.2, 124.1, 123.7, 118.2, 54.8, 50.2, 41.7, 33.6, 33.2, 28.8, 27.9, 21.3; FTIR ( $\text{cm}^{-1}$ ): 3423, 2955, 2926, 1714, 1657, 1640, 1512, 1484, 1373, 1243, 791, 771, 715, 700; HRMS (ESI-TOF)  $m/z$ :  $[\text{M} + \text{H}]^+$  calcd for  $\text{C}_{35}\text{H}_{33}\text{N}_2\text{O}_3$  529.2486, found 529.2488.

***N*-(7,7-dimethyl-4-(naphthalen-2-yl)-2,5-dioxo-1-(*p*-tolyl)-1,2,3,4,5,6,7,8-octahydroquinolin-3-yl)benzamide (4p)**

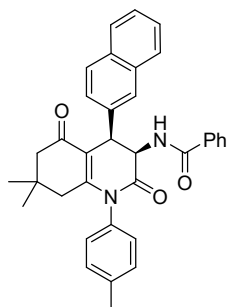

Purified by silica gel column chromatography (Petroleum ether/EtOAc = 2/1); white solid; 45.4 mg, 86% yield; >99:1 dr; M.P.: 174.6-176.1 °C; <sup>1</sup>H NMR (400 MHz, CDCl<sub>3</sub>) δ 7.81-7.75 (m, 2H), 7.75-7.70 (m, 2H), 7.66-7.60 (m, 2H), 7.47-7.40 (m, 3H), 7.36 (dd, *J* = 8.5, 1.6 Hz, 2H), 7.32 (dd, *J* = 10.4, 4.7 Hz, 3H), 7.19 (d, *J* = 7.9 Hz, 1H), 7.14 (d, *J* = 7.9 Hz, 1H), 6.58 (d, *J* = 6.7 Hz, 1H), 5.45 (dd, *J* = 7.4, 6.9 Hz, 1H), 5.09 (d, *J* = 7.6 Hz, 1H), 2.43 (s, 3H), 2.31 (t, *J* = 9.9 Hz, 2H), 2.26 (s, 1H), 2.14 (d, *J* = 17.7 Hz, 1H), 1.09 (s, 3H), 1.01 (s, 3H); <sup>13</sup>C NMR{<sup>1</sup>H} (101 MHz, CDCl<sub>3</sub>) δ 195.2, 169.5, 167.5, 152.5, 139.4, 134.0, 134.0, 134.0, 133.5, 132.9, 131.8, 130.7, 130.6, 129.0, 128.7, 128.6, 127.8, 127.7, 127.4, 127.1, 127.1, 126.4, 126.3, 126.1, 117.6, 54.2, 50.2, 41.7, 38.7, 33.1, 28.7, 28.0, 21.3; FTIR (cm<sup>-1</sup>): 3440, 2960, 2918, 1714, 1666, 1643, 1515, 1484, 1368, 1314, 1243, 817, 800, 752, 698; HRMS (ESI-TOF) *m/z*: [M + H]<sup>+</sup> calcd for C<sub>35</sub>H<sub>33</sub>N<sub>2</sub>O<sub>3</sub> 529.2486, found 529.2486.

***N*-(4-(furan-2-yl)-7,7-dimethyl-2,5-dioxo-1-(*p*-tolyl)-1,2,3,4,5,6,7,8-octahydroquinolin-3-yl)benzamide (4q)**

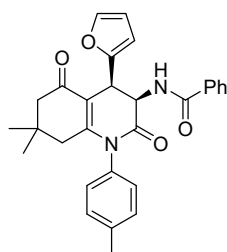

Purified by silica gel column chromatography (Petroleum ether/EtOAc = 2/1); white solid; 32.3 mg, 69% yield; >99:1 dr; M.P.: 222.8-223.1 °C; <sup>1</sup>H NMR (400 MHz,

CDCl<sub>3</sub>)  $\delta$  7.75-7.66 (m, 2H), 7.51-7.44 (m, 1H), 7.39 (t,  $J$  = 7.5 Hz, 2H), 7.34-7.27 (m, 3H), 7.11 (dd,  $J$  = 14.5, 8.6 Hz, 2H), 6.79 (d,  $J$  = 6.6 Hz, 1H), 6.27 (dd,  $J$  = 3.1, 1.9 Hz, 1H), 6.23 (d,  $J$  = 3.1 Hz, 1H), 5.24 (t,  $J$  = 6.8 Hz, 1H), 5.02 (d,  $J$  = 7.0 Hz, 1H), 2.43 (s, 3H), 2.29 (s, 2H), 2.10 (q,  $J$  = 17.6 Hz, 2H), 1.06 (s, 3H), 0.96 (s, 3H); <sup>13</sup>C NMR{<sup>1</sup>H} (101 MHz, CDCl<sub>3</sub>)  $\delta$  194.8, 169.5, 167.3, 153.1, 150.7, 142.4, 139.2, 134.2, 134.0, 131.8, 130.6, 130.4, 128.9, 128.6, 127.7, 127.1, 115.5, 110.6, 108.8, 52.9, 50.1, 41.5, 33.1, 33.0, 28.5, 28.0, 21.3; FTIR (cm<sup>-1</sup>): 3443, 2960, 2918, 1717, 1652, 1646, 1538, 1510, 1379, 1311, 1234, 1183, 720; HRMS (ESI-TOF)  $m/z$ : [M + H]<sup>+</sup> calcd for C<sub>29</sub>H<sub>29</sub>N<sub>2</sub>O<sub>4</sub> 469.2122, found 469.2129.

***N*-(7,7-dimethyl-2,5-dioxo-4-(thiophen-2-yl)-1-(*p*-tolyl)-1,2,3,4,5,6,7,8-octahydroquinolin-3-yl)benzamide (4r)**

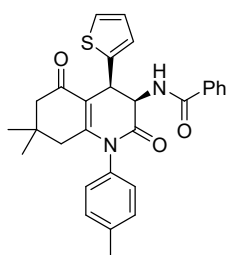

Purified by silica gel column chromatography (Petroleum ether/EtOAc = 2/1); white solid; 30.5 mg, 63% yield; >99:1 dr; M.P.: 248.2-248.4 °C; <sup>1</sup>H NMR (400 MHz, CDCl<sub>3</sub>)  $\delta$  7.78-7.71 (m, 2H), 7.49 (m, 1H), 7.41 (dd,  $J$  = 10.4, 4.6 Hz, 2H), 7.31 (d,  $J$  = 7.0 Hz, 2H), 7.21-7.14 (m, 2H), 7.10 (d,  $J$  = 7.5 Hz, 1H), 6.93 (dd,  $J$  = 5.1, 2.7 Hz, 2H), 6.77 (d,  $J$  = 6.5 Hz, 1H), 5.30 (t,  $J$  = 6.8 Hz, 1H), 5.21 (d,  $J$  = 6.9 Hz, 1H), 2.43 (s, 3H), 2.37-2.24 (m, 2H), 2.14 (q,  $J$  = 17.7 Hz, 2H), 1.07 (s, 3H), 1.03 (s, 3H); <sup>13</sup>C NMR{<sup>1</sup>H} (101 MHz, CDCl<sub>3</sub>)  $\delta$  194.7, 169.1, 167.2, 152.4, 139.4, 139.0, 134.0, 133.9, 131.8, 130.5, 130.5, 128.9, 128.6, 127.8, 127.4, 127.1, 126.7, 124.7, 118.0, 54.1, 50.1, 41.5, 34.3, 33.0, 28.3, 28.3, 21.3; FTIR (cm<sup>-1</sup>): 3443, 2963, 2923, 1717, 1671, 1652, 1521, 1495, 1359, 1251, 1149, 723; HRMS (ESI-TOF)  $m/z$ : [M + H]<sup>+</sup> calcd for C<sub>29</sub>H<sub>29</sub>N<sub>2</sub>O<sub>3</sub>S 485.1893, found 485.1899.

***N*-(7,7-dimethyl-2,5-dioxo-1-(*p*-tolyl)-4-(1-tosyl-1H-indol-3-yl)-1,2,3,4,5,6,7,8-octahydroquinolin-3-yl)benzamide (4s)**

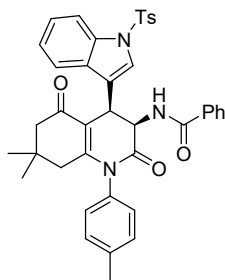

Purified by silica gel column chromatography (Petroleum ether/EtOAc = 1/1); white solid; 35.6 mg, 53% yield; >99:1 dr; M.P.: 268.2-268.4 °C; <sup>1</sup>H NMR (400 MHz, CDCl<sub>3</sub>) δ 7.87 (d, *J* = 8.3 Hz, 1H), 7.59 (dd, *J* = 8.1, 3.7 Hz, 3H), 7.45-7.37 (m, 3H), 7.34 (d, *J* = 7.7 Hz, 1H), 7.31-7.27 (m, 2H), 7.26-7.21 (m, 3H), 7.19 (dd, *J* = 10.4, 2.4 Hz, 1H), 7.11 (s, 3H), 7.06-6.99 (m, 1H), 6.41 (d, *J* = 6.5 Hz, 1H), 5.38 (t, *J* = 6.6 Hz, 1H), 5.19 (d, *J* = 6.8 Hz, 1H), 2.46 (s, 3H), 2.34 (dd, *J* = 14.0, 6.0 Hz, 2H), 2.25 (d, *J* = 20.0 Hz, 4H), 2.15 (d, *J* = 17.8 Hz, 1H), 1.10 (s, 3H), 1.05 (s, 3H); <sup>13</sup>C NMR{<sup>1</sup>H} (101 MHz, CDCl<sub>3</sub>) δ 194.6, 169.3, 167.6, 152.4, 145.1, 139.6, 135.3, 134.5, 133.8, 133.8, 131.6, 131.0, 131.0, 130.8, 129.9, 128.9, 128.4, 127.5, 127.0, 126.7, 125.2, 123.6, 123.3, 120.6, 119.7, 117.6, 113.6, 54.6, 50.1, 41.5, 33.1, 29.7, 28.4, 28.2, 21.5, 21.3; FTIR (cm<sup>-1</sup>): 3409, 2960, 2926, 1705, 1679, 1663, 1629, 1515, 1453, 1359, 1248, 1189, 1172, 1102, 811, 752, 692; HRMS (ESI-TOF) *m/z*: [M + H]<sup>+</sup> calcd for C<sub>40</sub>H<sub>38</sub>N<sub>3</sub>O<sub>5</sub>S 672.2527, found 672.2535.

***N*-(4-(benzo[*b*]thiophen-2-yl)-7,7-dimethyl-2,5-dioxo-1-(*p*-tolyl)-1,2,3,4,5,6,7,8-octahydroquinolin-3-yl)benzamide (4t)**

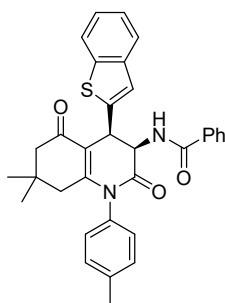

Purified by silica gel column chromatography (Petroleum ether/EtOAc = 2/1); white solid; 30.4 mg, 57% yield; >99:1 dr; M.P.: 242.5-242.6 °C; <sup>1</sup>H NMR (400 MHz, CDCl<sub>3</sub>) δ 7.74 (t, *J* = 7.6 Hz, 3H), 7.65 (dd, *J* = 6.3, 1.8 Hz, 1H), 7.48 (t, *J* = 7.4 Hz, 1H), 7.42-7.36 (m, 2H), 7.32 (dd, *J* = 11.2, 5.4 Hz, 2H), 7.30-7.23 (m, 3H), 7.18 (s,

1H), 7.12 (d,  $J = 8.0$  Hz, 1H), 6.84 (d,  $J = 6.1$  Hz, 1H), 5.40-5.34 (m, 1H), 5.32 (d,  $J = 7.2$  Hz, 1H), 2.45 (s, 3H), 2.34 (t,  $J = 9.5$  Hz, 2H), 2.21 (d,  $J = 17.8$  Hz, 1H), 2.11 (d,  $J = 17.8$  Hz, 1H), 1.08 (s, 3H), 1.03 (s, 3H);  $^{13}\text{C}$  NMR $\{^1\text{H}\}$  (101 MHz,  $\text{CDCl}_3$ )  $\delta$  194.8, 169.1, 167.4, 152.5, 139.9, 139.7, 139.5, 139.3, 133.9, 133.8, 131.9, 130.6, 130.5, 128.8, 128.7, 127.9, 127.2, 124.4, 124.3, 123.9, 123.5, 122.3, 117.3, 53.8, 50.1, 41.5, 35.3, 33.0, 28.4, 28.2, 21.3; FTIR ( $\text{cm}^{-1}$ ): 3446, 2960, 2921, 1717, 1663, 1654, 1620, 1515, 1490, 1373, 1359, 1246, 1192, 808, 726, 702; HRMS (ESI-TOF)  $m/z$ :  $[\text{M} + \text{H}]^+$  calcd for  $\text{C}_{33}\text{H}_{31}\text{N}_2\text{O}_3\text{S}$  535.2050, found 535.2061.

***N*-(7,7-dimethyl-2,5-dioxo-4-phenyl-1-(*p*-tolyl)-1,2,3,4,5,6,7,8-octahydroquinolin-3-yl)-4-methoxybenzamide (4v)**

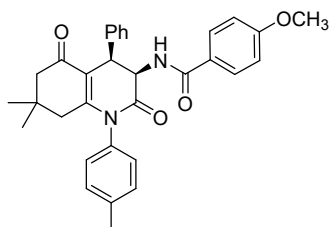

Purified by silica gel column chromatography (Petroleum ether/EtOAc = 1/1); white solid; 35.6 mg, 70% yield; >99:1 dr; M.P.: 192.0-193.4 °C;  $^1\text{H}$  NMR (400 MHz,  $\text{CDCl}_3$ )  $\delta$  7.67-7.58 (m, 2H), 7.32 (dd,  $J = 10.4, 4.5$  Hz, 2H), 7.30-7.26 (m, 2H), 7.26-7.19 (m, 3H), 7.11 (d,  $J = 8.5$  Hz, 2H), 6.90-6.83 (m, 2H), 6.44 (d,  $J = 6.8$  Hz, 1H), 5.40-5.33 (m, 1H), 4.87 (d,  $J = 7.6$  Hz, 1H), 3.81 (s, 3H), 2.44 (s, 3H), 2.31 (t,  $J = 9.8$  Hz, 2H), 2.23 (d,  $J = 17.7$  Hz, 1H), 2.10 (d,  $J = 17.5$  Hz, 1H), 1.08 (s, 3H), 1.01 (s, 3H);  $^{13}\text{C}$  NMR $\{^1\text{H}\}$  (101 MHz,  $\text{CDCl}_3$ )  $\delta$  195.1, 169.7, 166.8, 162.4, 152.3, 139.3, 136.4, 134.0, 130.6, 130.5, 129.0, 128.9, 128.9, 128.2, 127.7, 127.5, 126.3, 117.5, 113.8, 55.4, 53.9, 50.2, 41.6, 38.7, 33.1, 28.7, 27.9, 21.3; FTIR ( $\text{cm}^{-1}$ ): 3417, 2960, 2921, 1717, 1660, 1635, 1515, 1501, 1376, 1314, 1246, 1186, 1143, 811, 700; HRMS (ESI-TOF)  $m/z$ :  $[\text{M} + \text{H}]^+$  calcd for  $\text{C}_{32}\text{H}_{33}\text{N}_2\text{O}_4$  509.2435, found 509.2441.

***N*-(7,7-dimethyl-2,5-dioxo-4-phenyl-1-(*p*-tolyl)-1,2,3,4,5,6,7,8-octahydroquinolin-3-yl)-4-fluorobenzamide (4w)**



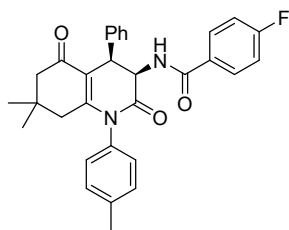

Purified by silica gel column chromatography (Petroleum ether/EtOAc = 2/1); white solid; 32.7 mg, 66% yield; >99:1 dr; M.P.: 234.5-236.1 °C; <sup>1</sup>H NMR (400 MHz, CDCl<sub>3</sub>) δ 7.66 (m, 2H), 7.36-7.28 (m, 3H), 7.28-7.24 (m, 2H), 7.24-7.19 (m, 2H), 7.11 (d, *J* = 8.5 Hz, 2H), 7.08-7.00 (m, 2H), 6.48 (d, *J* = 6.7 Hz, 1H), 5.40-5.30 (m, 1H), 4.88 (d, *J* = 7.6 Hz, 1H), 2.44 (s, 3H), 2.31 (t, *J* = 9.6 Hz, 2H), 2.23 (d, *J* = 17.7 Hz, 1H), 2.11 (d, *J* = 17.6 Hz, 1H), 1.08 (s, 3H), 1.01 (s, 3H); <sup>13</sup>C NMR {<sup>1</sup>H} (101 MHz, CDCl<sub>3</sub>) δ 195.1, 169.4, 166.2, 166.9 (d, *J* = 253.5 Hz), 152.3, 139.4, 136.4, 133.9, 130.7, 130.6, 130.2 (d, *J* = 3.0 Hz), 129.5, 129.4, 128.9, 128.2, 127.8, 127.5, 117.5, 115.8, 115.5, 54.1, 50.2, 41.6, 38.6, 33.1, 28.7, 27.9, 21.3; <sup>19</sup>F NMR (377 MHz, CDCl<sub>3</sub>) δ -107.71; FTIR (cm<sup>-1</sup>): 3432, 2960, 2921, 1711, 1663, 1640, 1511, 1489, 1376, 1243, 1189, 1146, 857, 700; HRMS (ESI-TOF) *m/z*: [M + H]<sup>+</sup> calcd for C<sub>31</sub>H<sub>30</sub>FN<sub>2</sub>O<sub>3</sub> 497.2235, found 497.2240.

**4-chloro-N-(7,7-dimethyl-2,5-dioxo-4-phenyl-1-(p-tolyl)-1,2,3,4,5,6,7,8-octahydroquinolin-3-yl)benzamide (4x)**

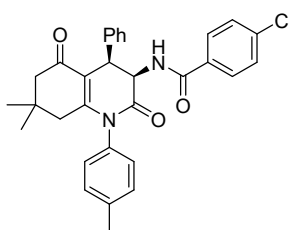

Purified by silica gel column chromatography (Petroleum ether/EtOAc = 2/1); white solid; 31.8 mg, 62% yield; >99:1 dr; M.P.: 243.6-244.5 °C; <sup>1</sup>H NMR (400 MHz, CDCl<sub>3</sub>) δ 7.45 (dd, *J* = 5.0, 1.1 Hz, 1H), 7.36-7.31 (m, 3H), 7.29 (dd, *J* = 7.3, 5.1 Hz, 2H), 7.25 (dd, *J* = 7.8, 2.3 Hz, 3H), 7.22 (s, 1H), 7.11 (d, *J* = 8.5 Hz, 2H), 7.00 (dd, *J* = 4.9, 3.8 Hz, 1H), 6.40 (d, *J* = 6.8 Hz, 1H), 5.38-5.29 (m, 1H), 4.86 (d, *J* = 7.6 Hz, 1H), 2.43 (s, 3H), 2.30 (t, *J* = 9.8 Hz, 2H), 2.23 (d, *J* = 17.7 Hz, 1H), 2.11 (d, *J* = 17.5 Hz, 1H), 1.08 (s, 3H), 1.00 (s, 3H); <sup>13</sup>C NMR {<sup>1</sup>H} (101 MHz, CDCl<sub>3</sub>) δ 195.1, 169.3,

161.6, 152.4, 139.4, 138.2, 136.2, 133.9, 130.6, 130.5, 130.5, 128.9, 128.5, 128.2, 127.8, 127.7, 127.5, 127.5, 117.4, 53.9, 50.2, 41.6, 38.7, 33.1, 28.7, 28.0, 21.3; FTIR (cm<sup>-1</sup>): 3423, 2963, 2921, 1714, 1666, 1646, 1549, 1519, 1386, 1246, 1145, 1070, 817, 715; HRMS (ESI-TOF) m/z: [M + H]<sup>+</sup> calcd for C<sub>31</sub>H<sub>30</sub>ClN<sub>2</sub>O<sub>3</sub> 513.1939, found 513.1941.

***N*-(7,7-dimethyl-2,5-dioxo-4-phenyl-1-(*p*-tolyl)-1,2,3,4,5,6,7,8-octahydroquinolin-3-yl)-3,5-dimethylbenzamide (4y)**

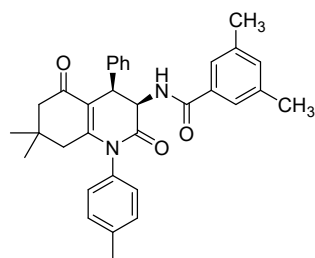

Purified by silica gel column chromatography (Petroleum ether/EtOAc = 2/1); white solid; 35.9 mg, 71% yield; >99:1 dr; M.P.: 184.5-186.1 °C; <sup>1</sup>H NMR (400 MHz, CDCl<sub>3</sub>) δ 7.36-7.28 (m, 3H), 7.28-7.25 (m, 3H), 7.25-7.19 (m, 3H), 7.12 (s, 1H), 7.10 (d, *J* = 4.9 Hz, 2H), 6.52 (d, *J* = 6.8 Hz, 1H), 5.36 (dd, *J* = 7.4, 7.0 Hz, 1H), 4.90 (d, *J* = 7.6 Hz, 1H), 2.43 (s, 3H), 2.29 (d, *J* = 3.6 Hz, 8H), 2.26-2.18 (m, 1H), 2.12 (d, *J* = 17.6 Hz, 1H), 1.08 (s, 3H), 1.01 (s, 3H); <sup>13</sup>C NMR {<sup>1</sup>H} (101 MHz, CDCl<sub>3</sub>) δ 195.1, 169.6, 167.7, 152.3, 139.4, 138.3, 136.4, 134.0, 134.0, 133.4, 130.6, 130.5, 129.0, 128.9, 128.2, 127.7, 127.5, 124.9, 117.5, 54.0, 50.2, 41.6, 38.6, 33.1, 28.7, 28.0, 21.3, 21.2; FTIR (cm<sup>-1</sup>): 3435, 2948, 2918, 1714, 1660, 1643, 1547, 1515, 1376, 1243, 1180, 1143, 814, 760, 735, 700; HRMS (ESI-TOF) m/z: [M + H]<sup>+</sup> calcd for C<sub>33</sub>H<sub>35</sub>N<sub>2</sub>O<sub>3</sub> 507.2642, found 507.2647.

***N*-(7,7-dimethyl-2,5-dioxo-4-phenyl-1-(*p*-tolyl)-1,2,3,4,5,6,7,8-octahydroquinolin-3-yl)-2-naphthamide (4z)**

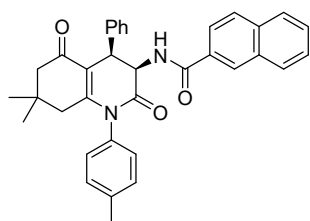

Purified by silica gel column chromatography (Petroleum ether/EtOAc = 2/1); white solid; 39.6 mg, 75% yield; >99:1 dr; M.P.: 253.3-255.7 °C; <sup>1</sup>H NMR (400 MHz, CDCl<sub>3</sub>) δ 8.17 (s, 1H), 7.85 (d, *J* = 8.2 Hz, 3H), 7.73 (dd, *J* = 8.6, 1.6 Hz, 1H), 7.52 (m, 2H), 7.37-7.31 (m, 2H), 7.29 (dd, *J* = 4.6, 2.5 Hz, 2H), 7.27-7.22 (m, 3H), 7.13 (d, *J* = 8.5 Hz, 2H), 6.70 (d, *J* = 6.7 Hz, 1H), 5.44 (t, *J* = 7.2 Hz, 1H), 4.95 (d, *J* = 7.6 Hz, 1H), 2.45 (s, 3H), 2.33 (t, *J* = 10.0 Hz, 2H), 2.25 (d, *J* = 17.5 Hz, 1H), 2.13 (d, *J* = 17.5 Hz, 1H), 1.10 (s, 3H), 1.02 (s, 3H); <sup>13</sup>C NMR{<sup>1</sup>H} (101 MHz, CDCl<sub>3</sub>) δ 195.1, 169.6, 167.3, 152.3, 139.4, 136.4, 134.9, 134.0, 132.6, 131.2, 130.7, 130.6, 129.0, 129.0, 128.9, 128.5, 128.2, 127.8, 127.8, 127.7, 127.7, 127.5, 126.8, 123.6, 117.5, 54.1, 50.2, 41.6, 38.6, 33.1, 28.7, 28.0, 21.3; FTIR (cm<sup>-1</sup>): 3426, 2958, 2918, 1711, 1676, 1660, 1535, 1515, 1360, 1256, 1125, 1090, 817, 777, 686; HRMS (ESI-TOF) *m/z*: [M + H]<sup>+</sup> calcd for C<sub>35</sub>H<sub>33</sub>N<sub>2</sub>O<sub>3</sub> 529.2486, found 529.2492.

***N*-(7,7-dimethyl-2,5-dioxo-4-phenyl-1-(*p*-tolyl)-1,2,3,4,5,6,7,8-octahydroquinolin-3-yl)thiophene-2-carboxamide (4a')**

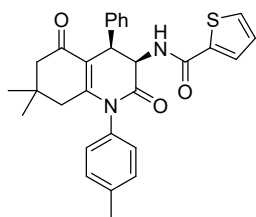

Purified by silica gel column chromatography (Petroleum ether/EtOAc = 2/1); white solid; 34.8 mg, 72% yield; >99:1 dr; M.P.: 239.6-240.1 °C; <sup>1</sup>H NMR (400 MHz, CDCl<sub>3</sub>) δ 7.45 (d, *J* = 4.7 Hz, 1H), 7.33 (dd, *J* = 9.2, 3.6 Hz, 3H), 7.29 (d, *J* = 7.5 Hz, 2H), 7.24 (dd, *J* = 8.8, 7.7 Hz, 3H), 7.10 (d, *J* = 8.3 Hz, 2H), 7.05-6.95 (m, 1H), 6.39 (d, *J* = 6.7 Hz, 1H), 5.34 (t, *J* = 7.2 Hz, 1H), 4.86 (d, *J* = 7.5 Hz, 1H), 2.44 (s, 3H), 2.31 (t, *J* = 9.8 Hz, 2H), 2.23 (d, *J* = 17.6 Hz, 1H), 2.11 (d, *J* = 17.6 Hz, 1H), 1.08 (s, 3H), 1.01 (s, 3H); <sup>13</sup>C NMR{<sup>1</sup>H} (101 MHz, CDCl<sub>3</sub>) δ 195.1, 169.3, 161.6, 152.3, 139.4, 138.2, 136.2, 133.9, 130.6, 130.5, 130.5, 128.9, 128.5, 128.2, 127.8, 127.8, 127.6, 127.5, 117.4, 53.9, 50.2, 41.6, 38.7, 33.1, 28.7, 28.0, 21.3; FTIR (cm<sup>-1</sup>): 3429, 2958, 2921, 1711, 1663, 1652, 1532, 1512, 1373, 1243, 1149, 1138, 817; HRMS (ESI-TOF) *m/z*: [M + H]<sup>+</sup> calcd for C<sub>29</sub>H<sub>29</sub>N<sub>2</sub>O<sub>3</sub>S 485.1893, found 485.1899.

## 2. Crystallographic information for products 3a and 4g

### 2.1 Crystallographic information for 3a

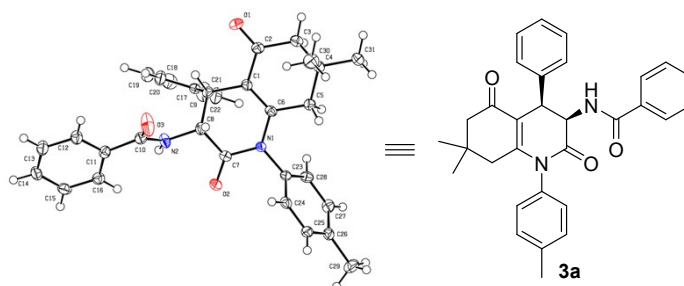

(The ellipsoid contour is drawn at 30% probability level)

|                                             |                                                               |
|---------------------------------------------|---------------------------------------------------------------|
| Identification code                         | <b>3a</b>                                                     |
| CCDC number                                 | 2103305                                                       |
| Empirical formula                           | C <sub>31</sub> H <sub>30</sub> N <sub>2</sub> O <sub>3</sub> |
| Formula weight                              | 478.57                                                        |
| Temperature/K                               | 150.00(10)                                                    |
| Crystal system                              | monoclinic                                                    |
| Space group                                 | P2 <sub>1</sub> /n                                            |
| a/Å                                         | 10.5155(11)                                                   |
| b/Å                                         | 15.442(2)                                                     |
| c/Å                                         | 15.190(2)                                                     |
| α/°                                         | 90                                                            |
| β/°                                         | 95.337(12)                                                    |
| γ/°                                         | 90                                                            |
| Volume/Å <sup>3</sup>                       | 2455.9(6)                                                     |
| Z                                           | 4                                                             |
| ρ <sub>calc</sub> /g/cm <sup>3</sup>        | 1.294                                                         |
| μ/mm <sup>-1</sup>                          | 0.083                                                         |
| F(000)                                      | 1016.0                                                        |
| Crystal size/mm <sup>3</sup>                | 0.14 × 0.13 × 0.12                                            |
| Radiation                                   | Mo Kα (λ = 0.71073)                                           |
| 2θ range for data collection/°              | 4.522 to 49.998                                               |
| Index ranges                                | -12 ≤ h ≤ 12, -18 ≤ k ≤ 14, -15 ≤ l ≤ 18                      |
| Reflections collected                       | 9576                                                          |
| Independent reflections                     | 4293 [R <sub>int</sub> = 0.0550, R <sub>sigma</sub> = 0.0677] |
| Data/restraints/parameters                  | 4293/0/328                                                    |
| Goodness-of-fit on F <sup>2</sup>           | 1.056                                                         |
| Final R indexes [I ≥ 2σ (I)]                | R <sub>1</sub> = 0.0609, wR <sub>2</sub> = 0.1430             |
| Final R indexes [all data]                  | R <sub>1</sub> = 0.0819, wR <sub>2</sub> = 0.1582             |
| Largest diff. peak/hole / e Å <sup>-3</sup> | 0.35/-0.31                                                    |

## 2.2 Crystallographic information for **4g**

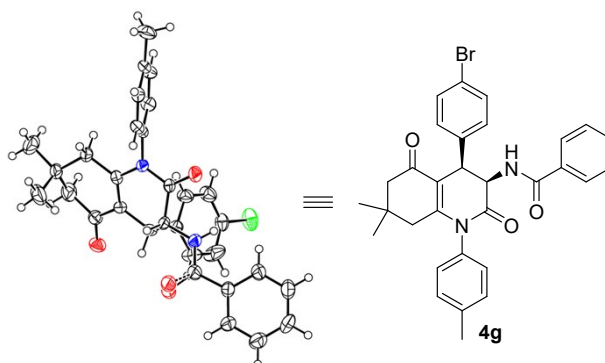

(The ellipsoid contour is drawn at 30% probability level)

|                                             |                                                                 |
|---------------------------------------------|-----------------------------------------------------------------|
| Identification code                         | <b>4g</b>                                                       |
| CCDC number                                 | 2103306                                                         |
| Empirical formula                           | C <sub>31</sub> H <sub>29</sub> BrN <sub>2</sub> O <sub>3</sub> |
| Formula weight                              | 557.47                                                          |
| Temperature/K                               | 250.01(10)                                                      |
| Crystal system                              | triclinic                                                       |
| Space group                                 | P-1                                                             |
| a/Å                                         | 10.5937(6)                                                      |
| b/Å                                         | 15.3406(11)                                                     |
| c/Å                                         | 16.5661(7)                                                      |
| $\alpha$ /°                                 | 87.802(5)                                                       |
| $\beta$ /°                                  | 88.240(4)                                                       |
| $\gamma$ /°                                 | 81.951(5)                                                       |
| Volume/Å <sup>3</sup>                       | 2662.9(3)                                                       |
| Z                                           | 4                                                               |
| $\rho_{\text{calc}}$ /cm <sup>3</sup>       | 1.391                                                           |
| $\mu$ /mm <sup>-1</sup>                     | 1.579                                                           |
| F(000)                                      | 1152.0                                                          |
| Crystal size/mm <sup>3</sup>                | 0.14 × 0.13 × 0.12                                              |
| Radiation                                   | Mo K $\alpha$ ( $\lambda$ = 0.71073)                            |
| 2 $\theta$ range for data collection/°      | 3.884 to 50                                                     |
| Index ranges                                | -12 ≤ h ≤ 12, -15 ≤ k ≤ 18, -19 ≤ l ≤ 19                        |
| Reflections collected                       | 19181                                                           |
| Independent reflections                     | 9378 [R <sub>int</sub> = 0.0446, R <sub>sigma</sub> = 0.0903]   |
| Data/restraints/parameters                  | 9378/6/683                                                      |
| Goodness-of-fit on F <sup>2</sup>           | 1.033                                                           |
| Final R indexes [I ≥ 2 $\sigma$ (I)]        | R <sub>1</sub> = 0.0621, wR <sub>2</sub> = 0.1327               |
| Final R indexes [all data]                  | R <sub>1</sub> = 0.1175, wR <sub>2</sub> = 0.1585               |
| Largest diff. peak/hole / e Å <sup>-3</sup> | 1.18/-0.56                                                      |

### 3. $^1\text{H}$ NOESY NMR spectra for compounds 3a, 4g, 10 and 12

#### $^1\text{H}$ NOESY NMR spectrum for 3a

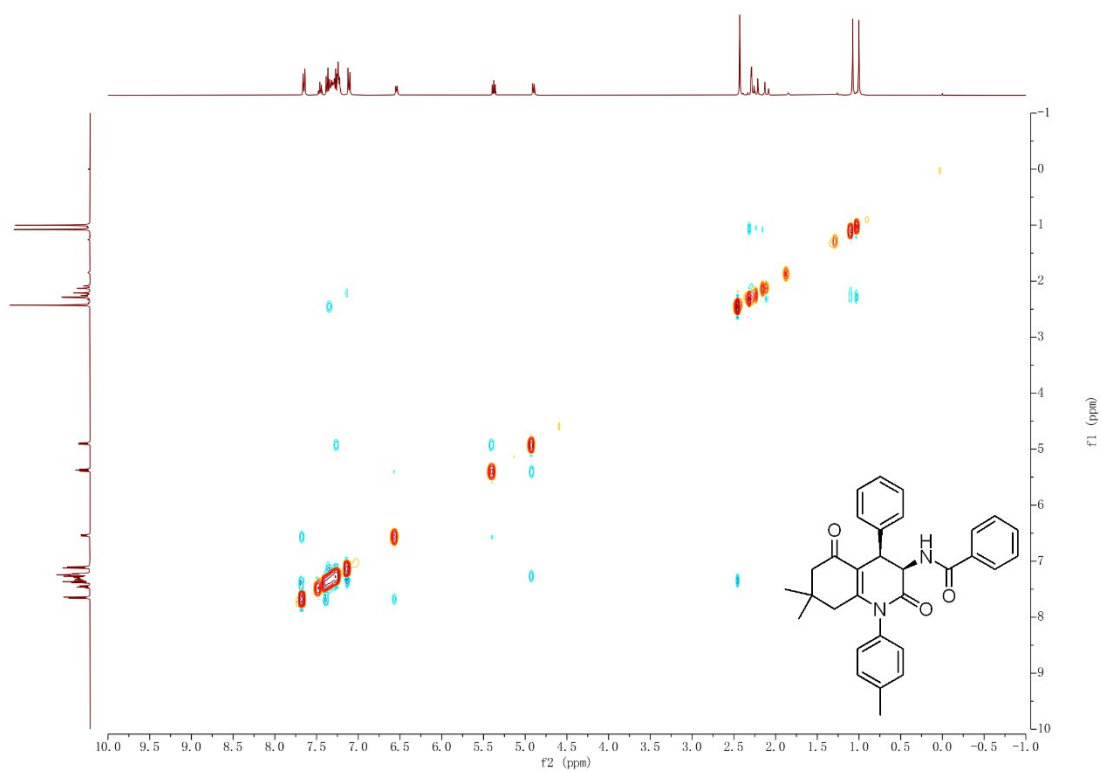

#### $^1\text{H}$ NOESY NMR spectrum for 4g

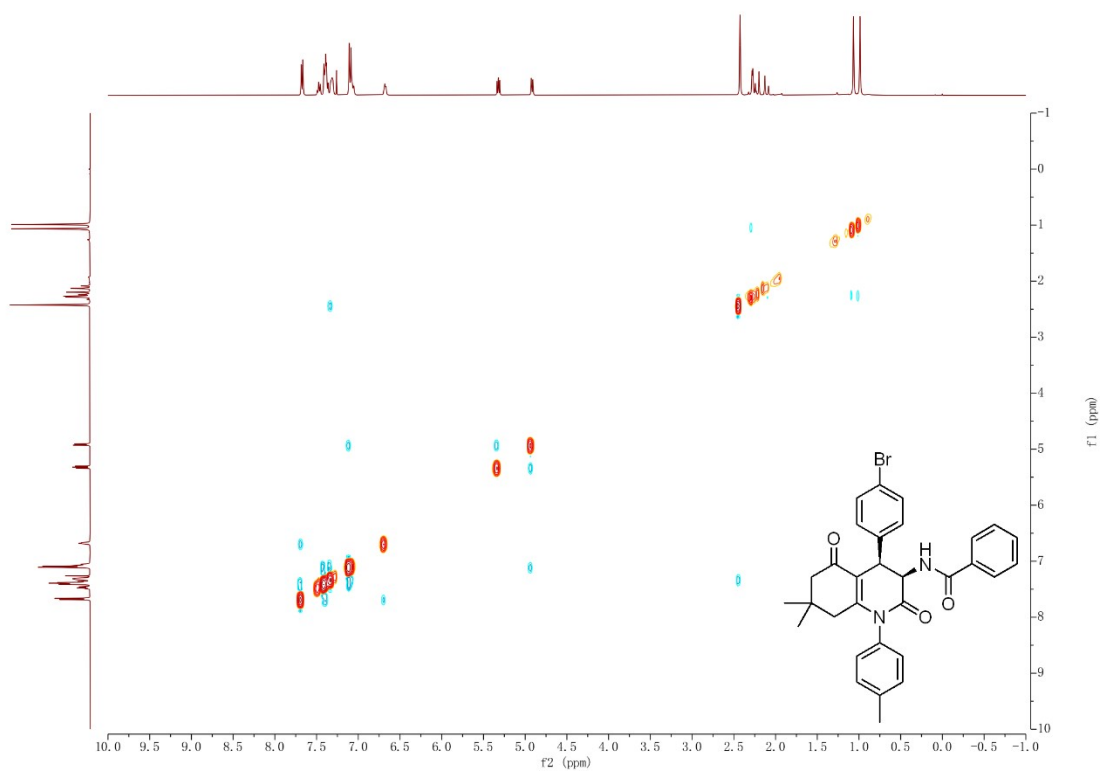

### <sup>1</sup>H NOESY NMR spectrum for 10

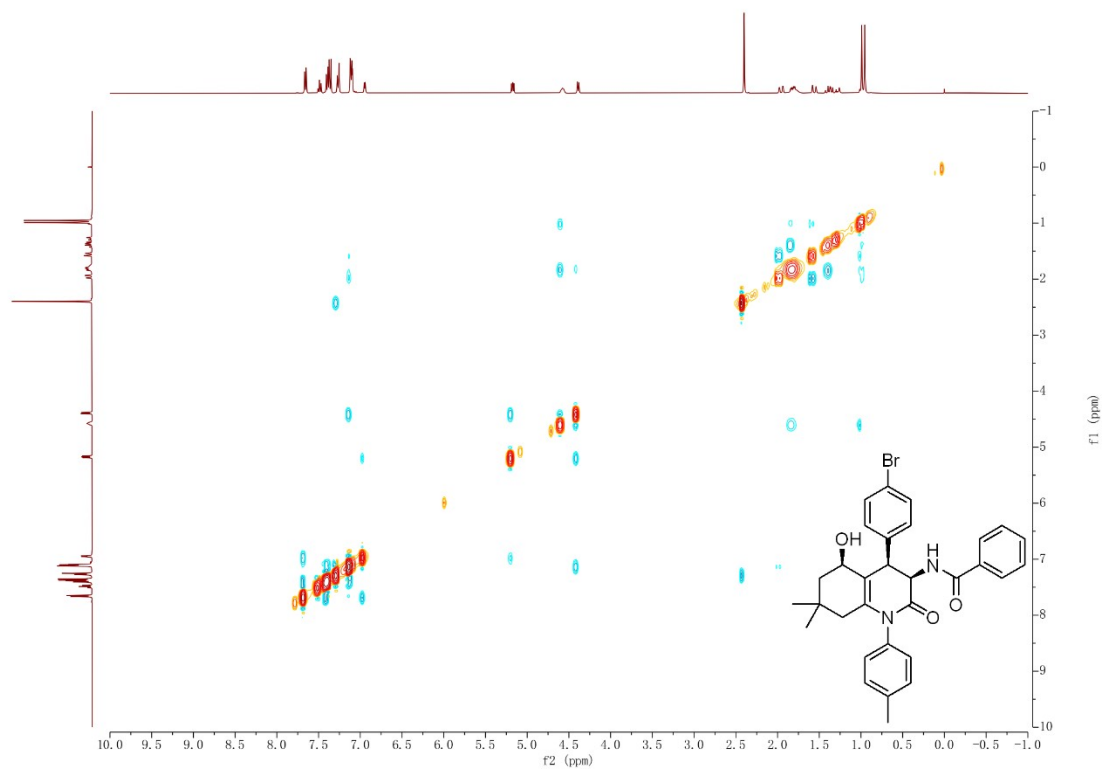

### <sup>1</sup>H NOESY NMR spectrum for 12

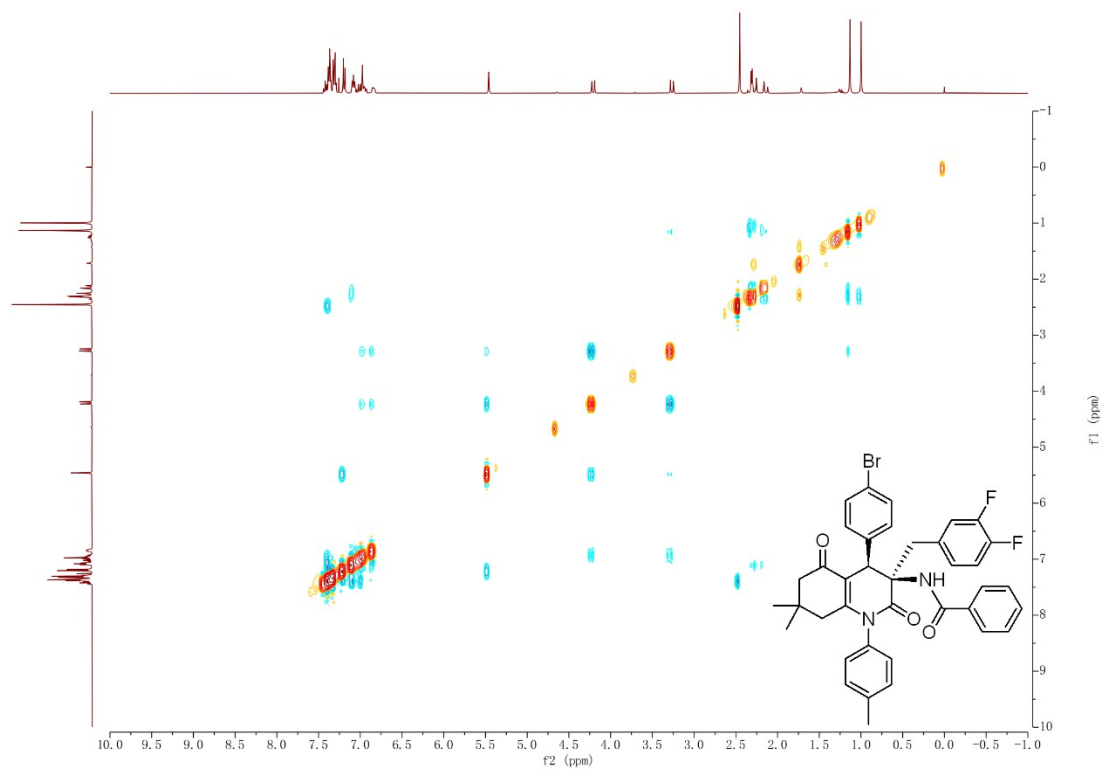

#### 4. $^1\text{H}$ , $^{13}\text{C}$ and $^{19}\text{F}$ NMR spectra for products 3 and 4

##### $^1\text{H}$ and $^{13}\text{C}$ NMR spectra for 3a

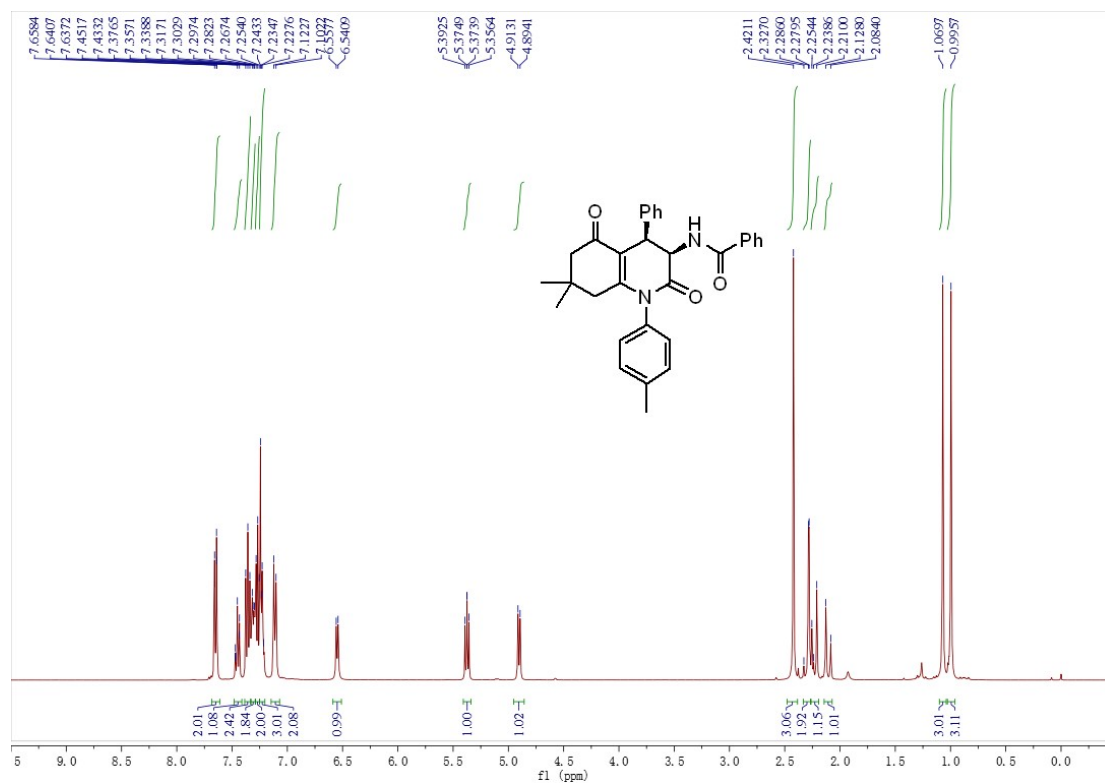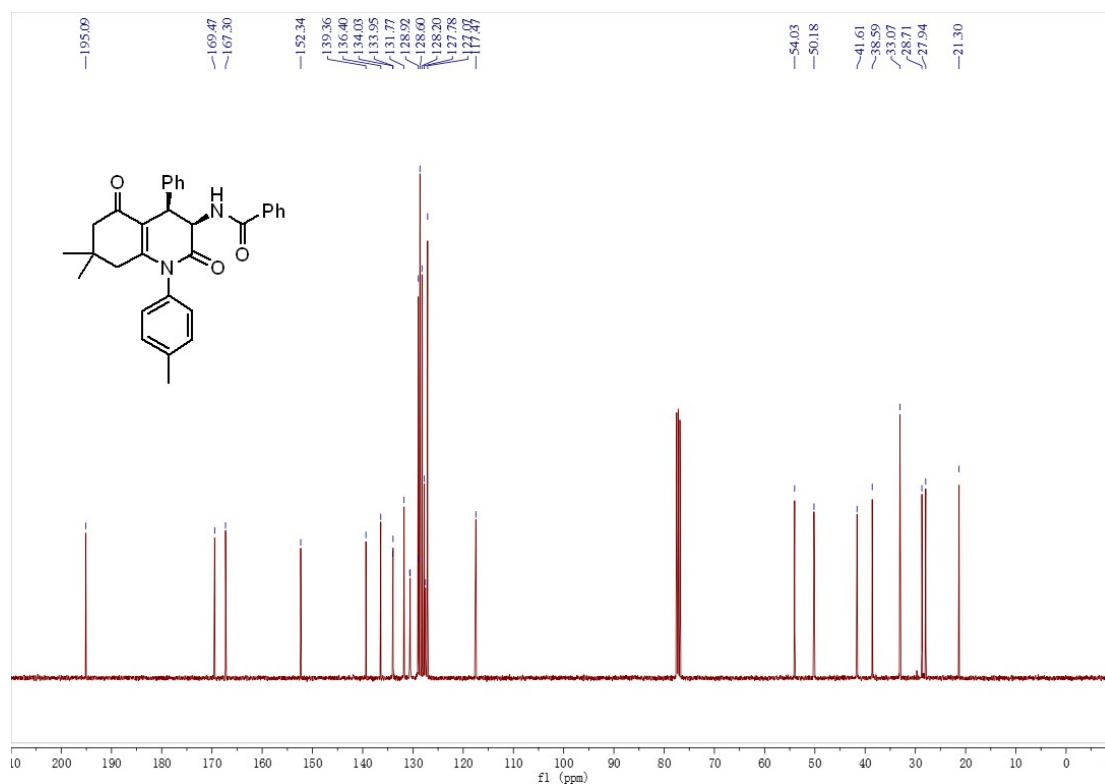



### <sup>1</sup>H and <sup>13</sup>C NMR spectra for 3b

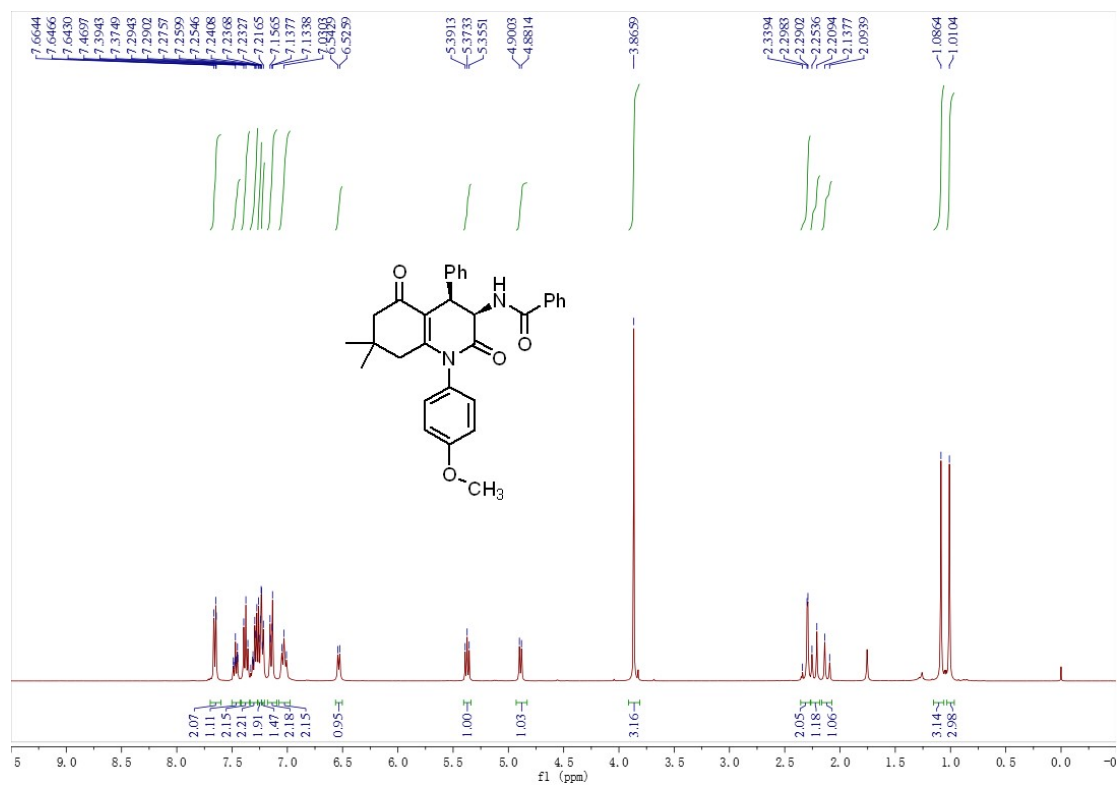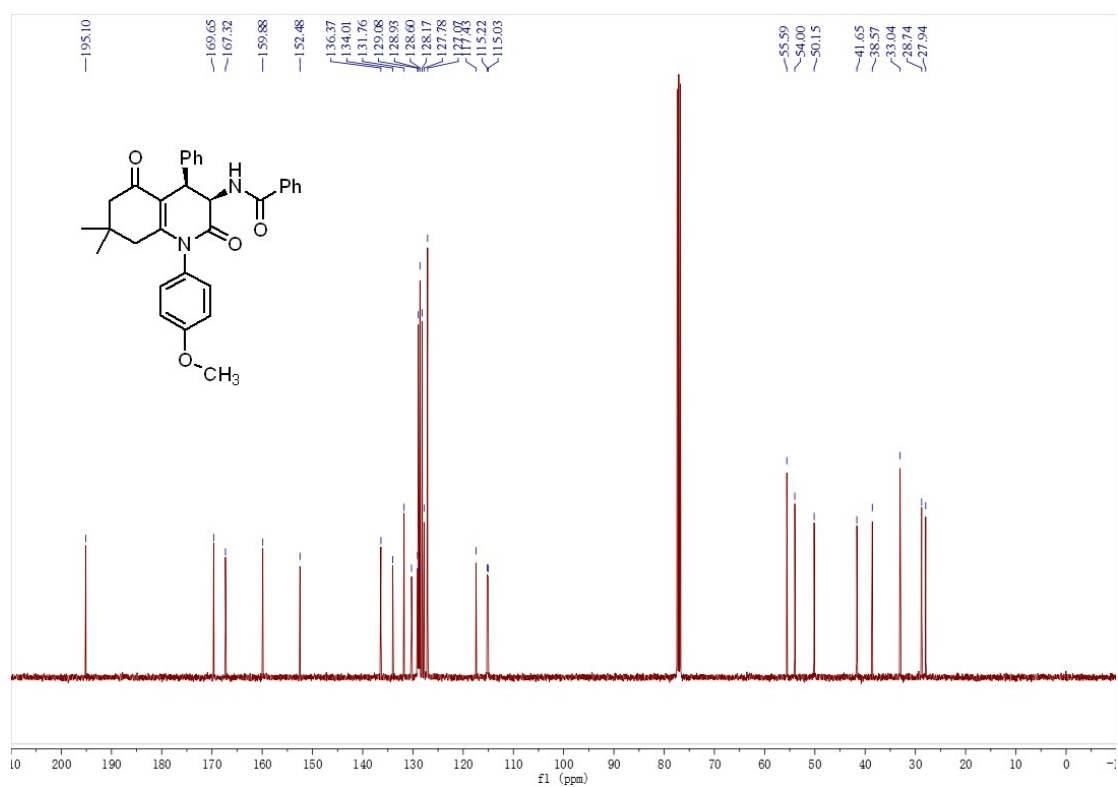

### <sup>1</sup>H, <sup>13</sup>C and <sup>19</sup>F NMR spectra for 3c

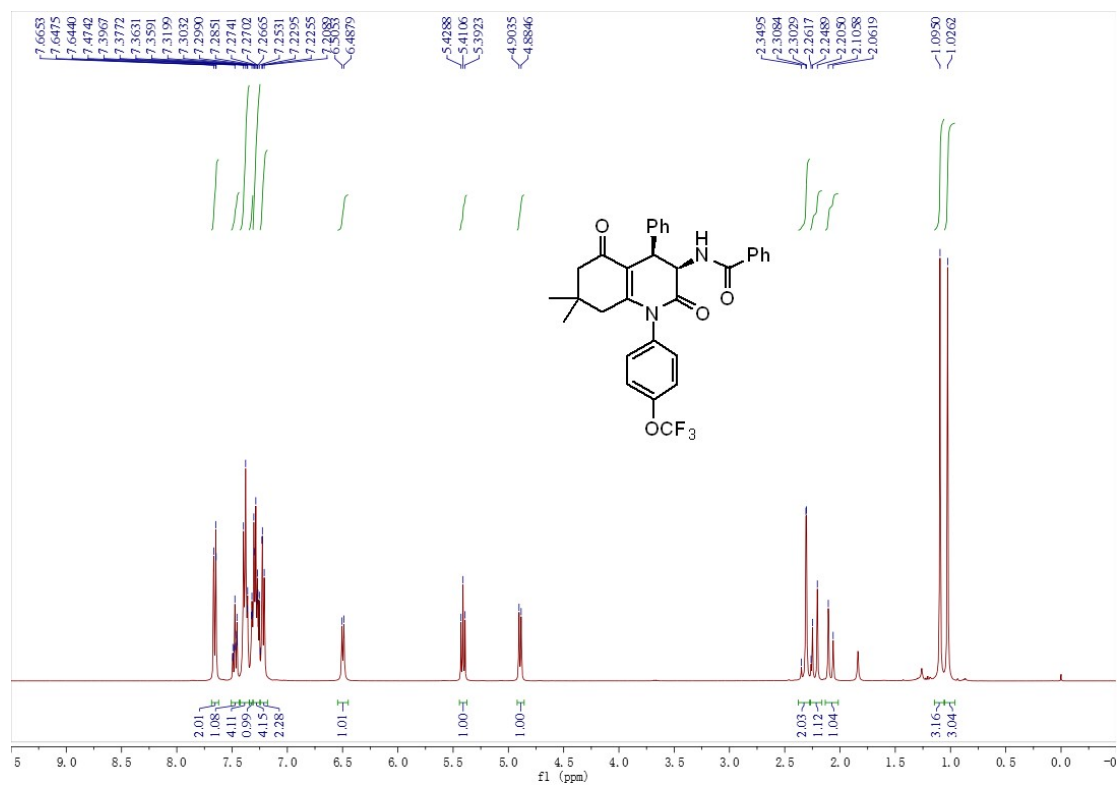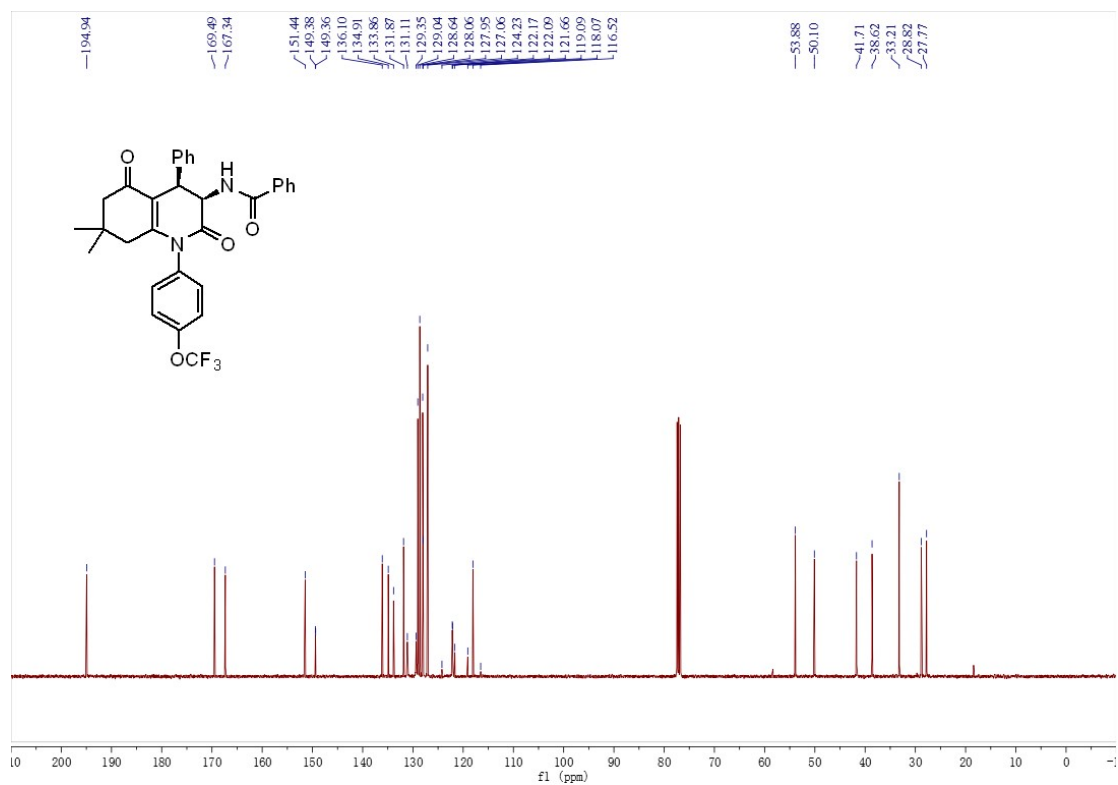

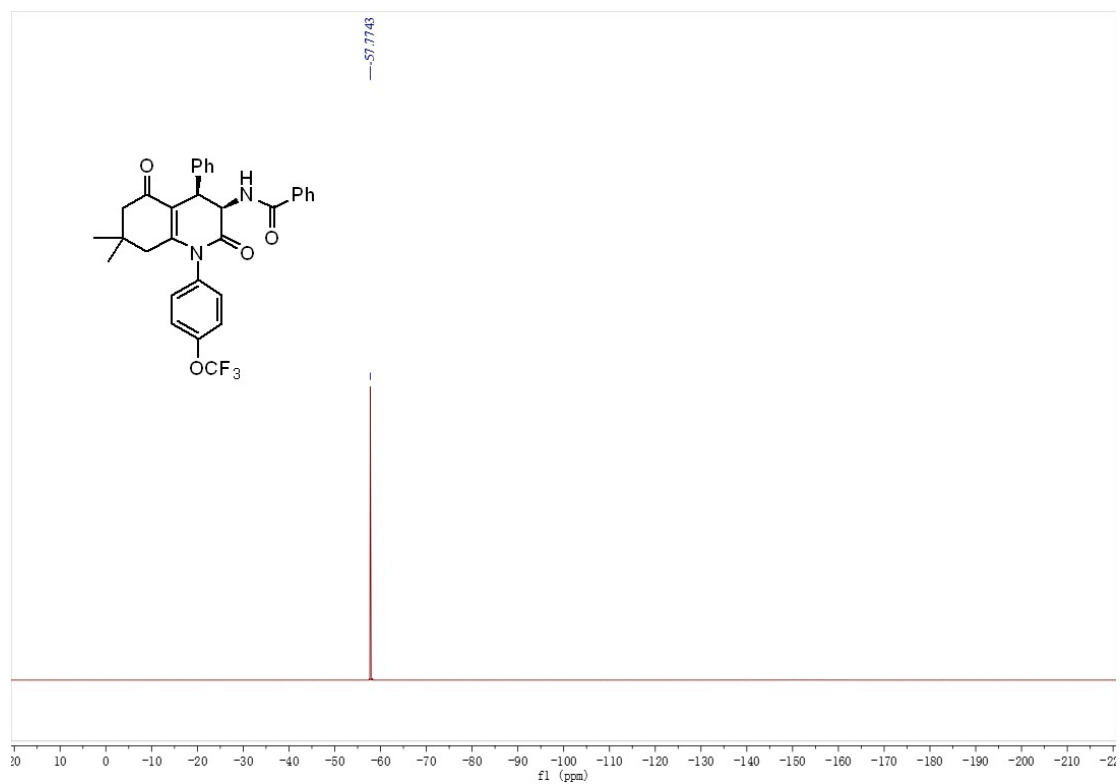

**$^1\text{H}$ ,  $^{13}\text{C}$  and  $^{19}\text{F}$  NMR spectra for 3d**

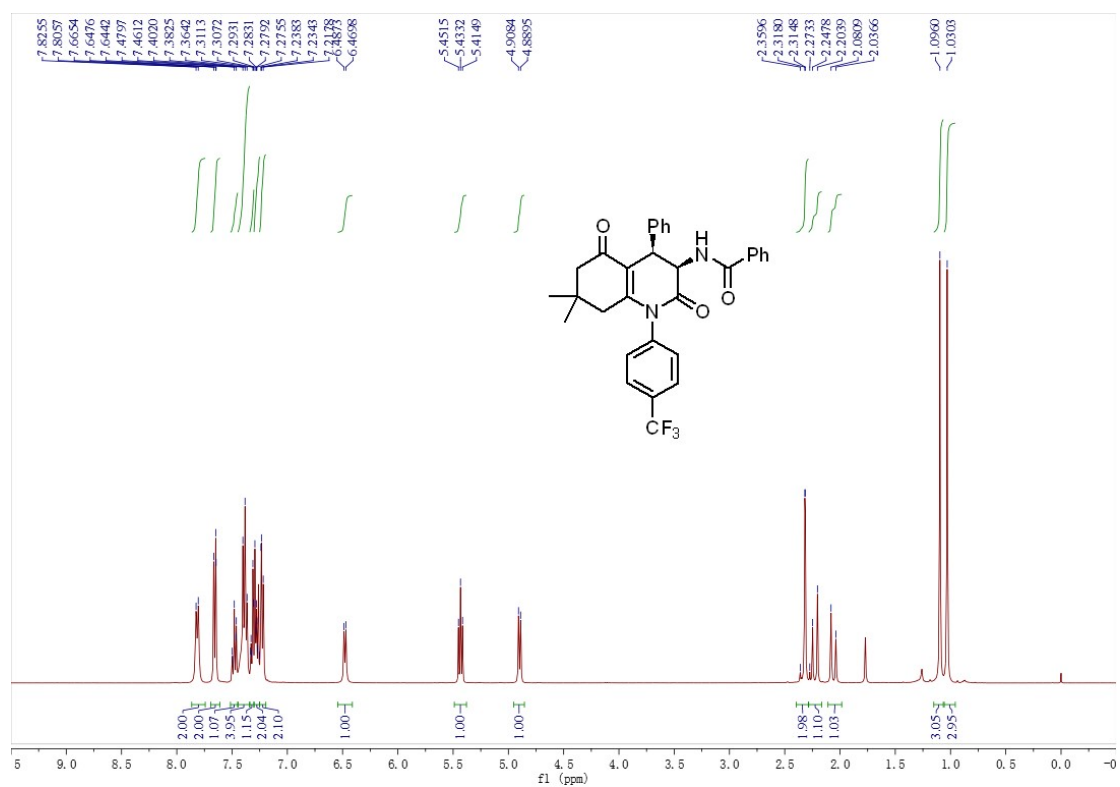

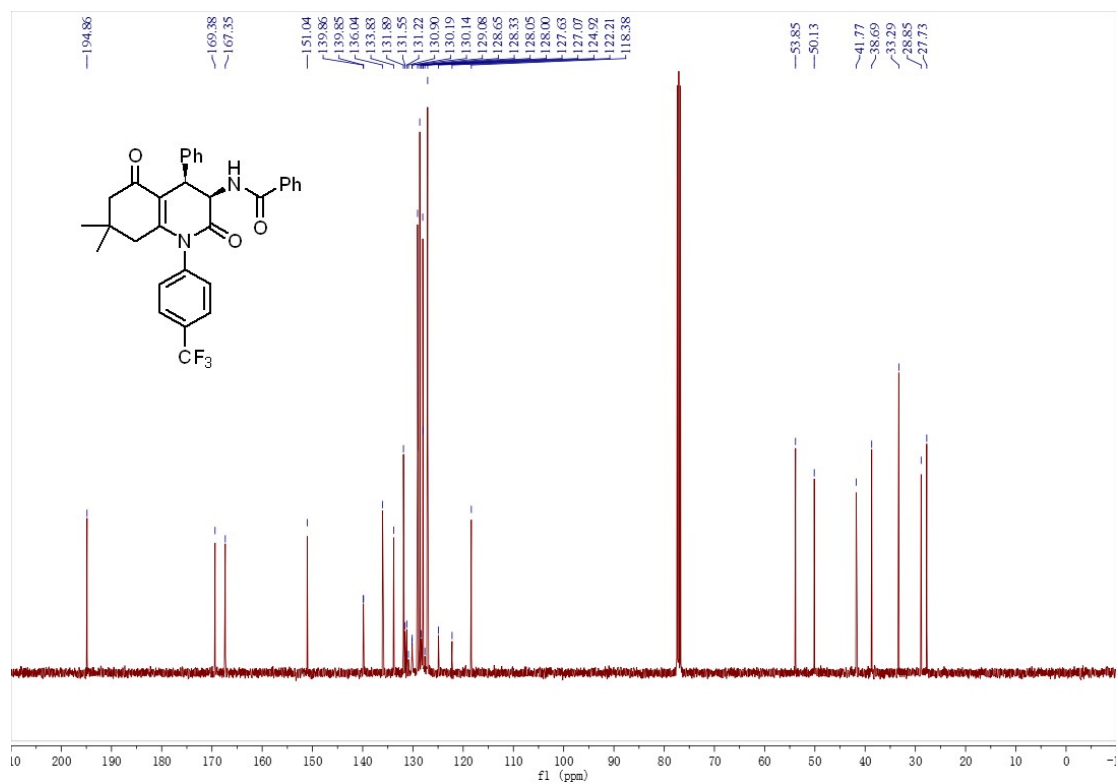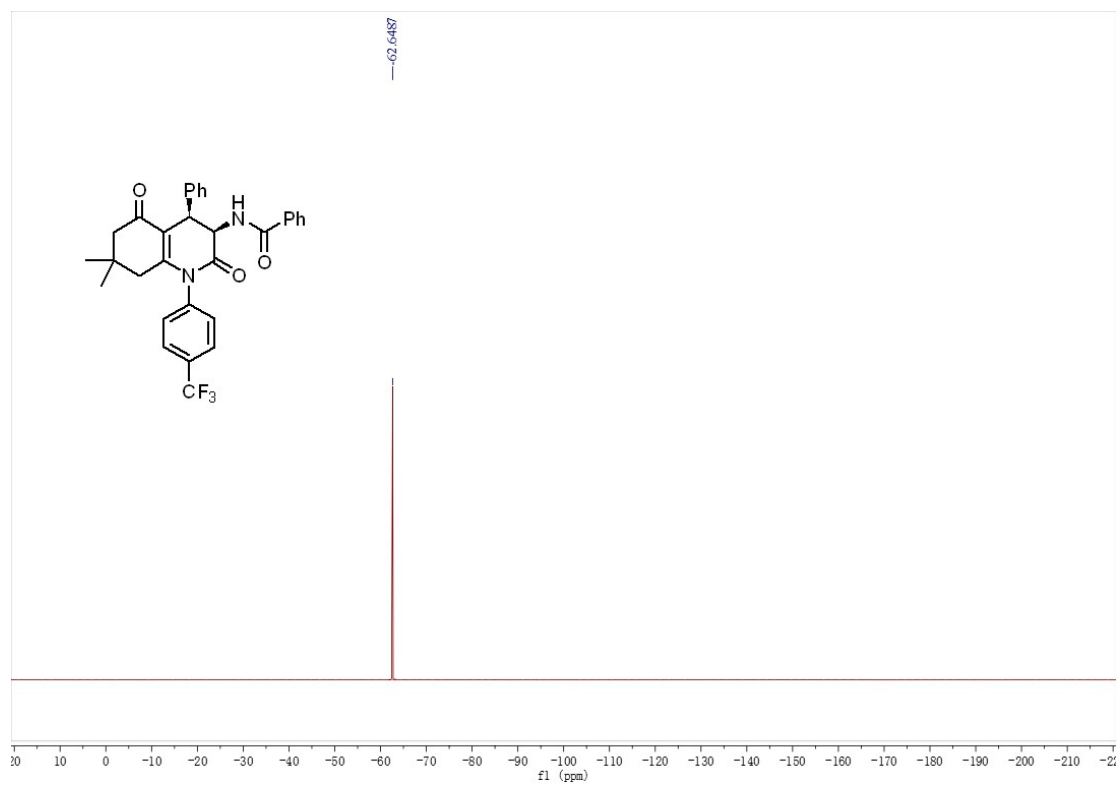

### $^1\text{H}$ , $^{13}\text{C}$ and $^{19}\text{F}$ NMR spectra for 3e

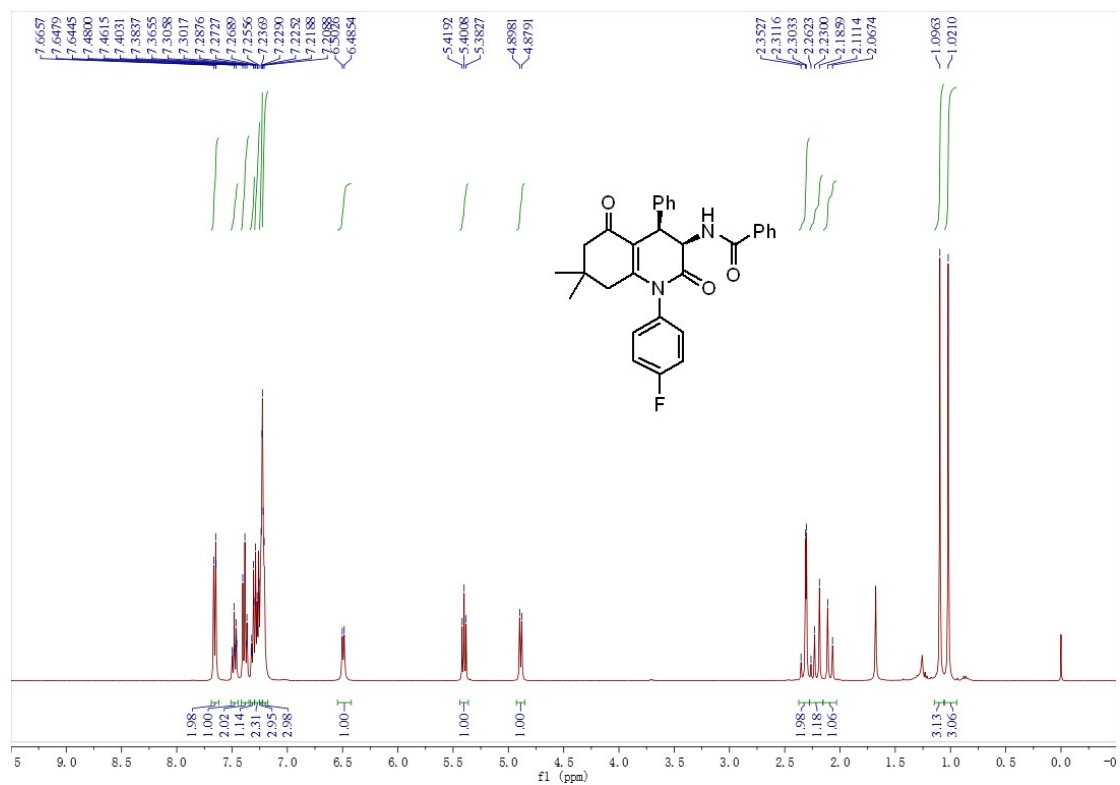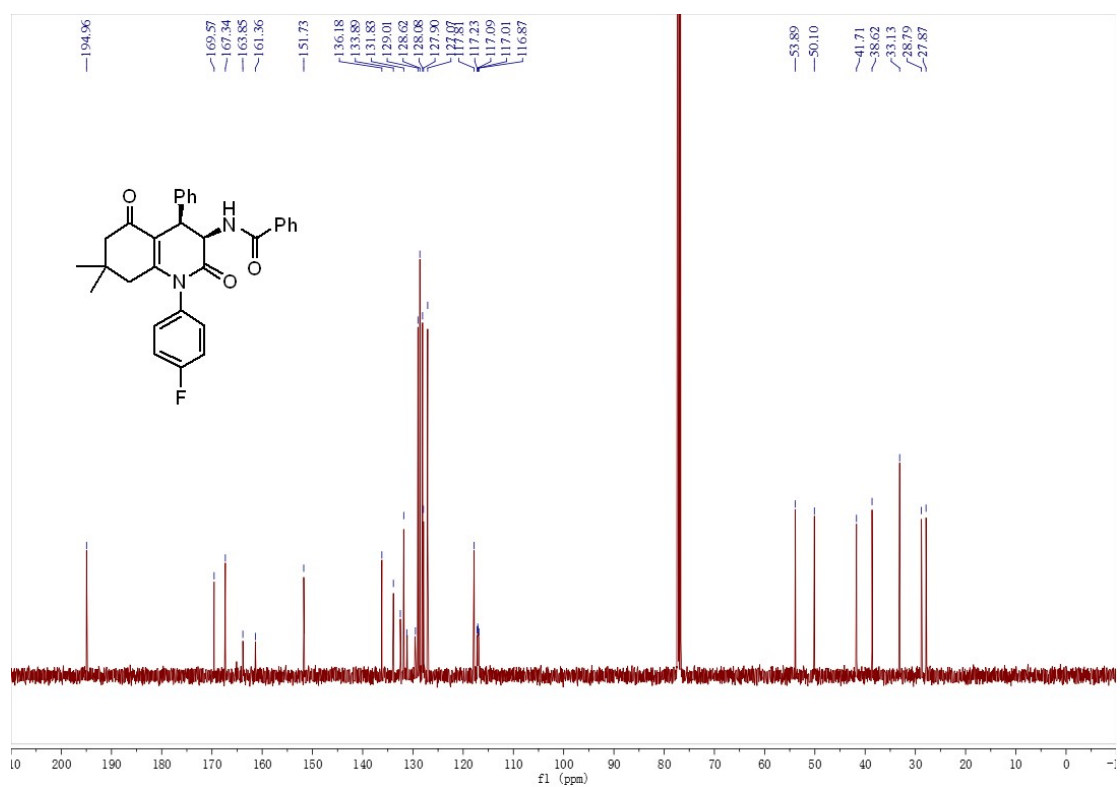

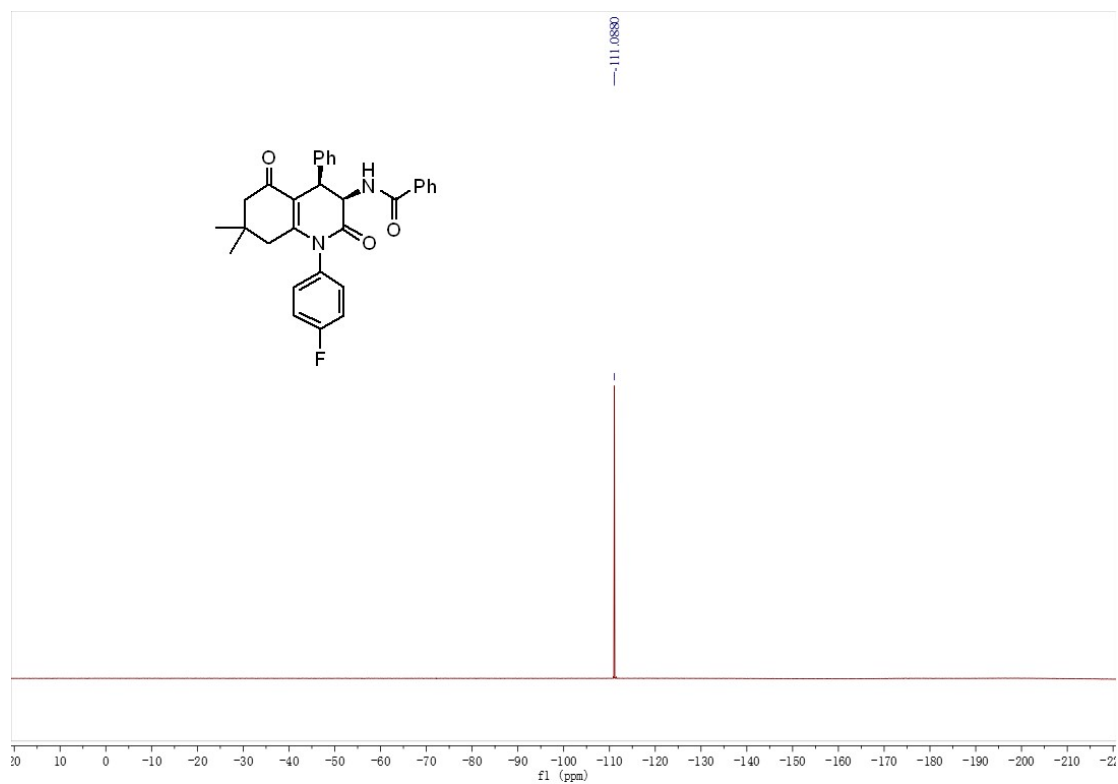

$^1\text{H}$  and  $^{13}\text{C}$  NMR spectra for 3f

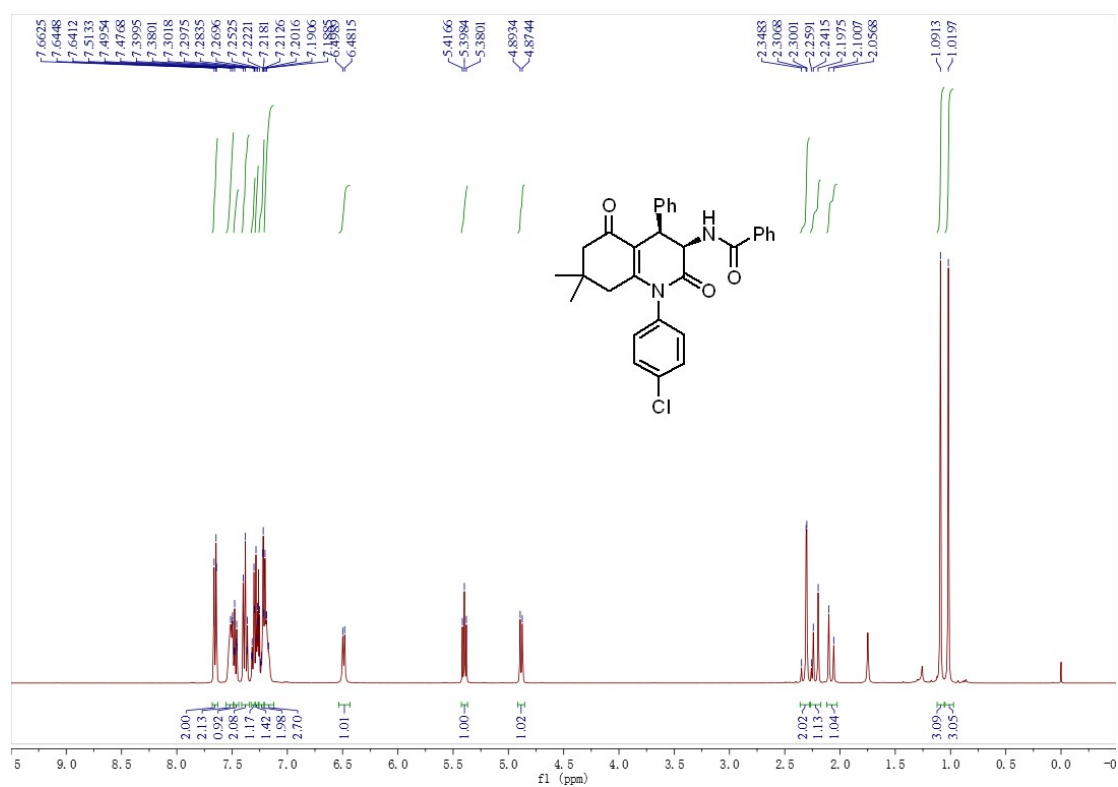

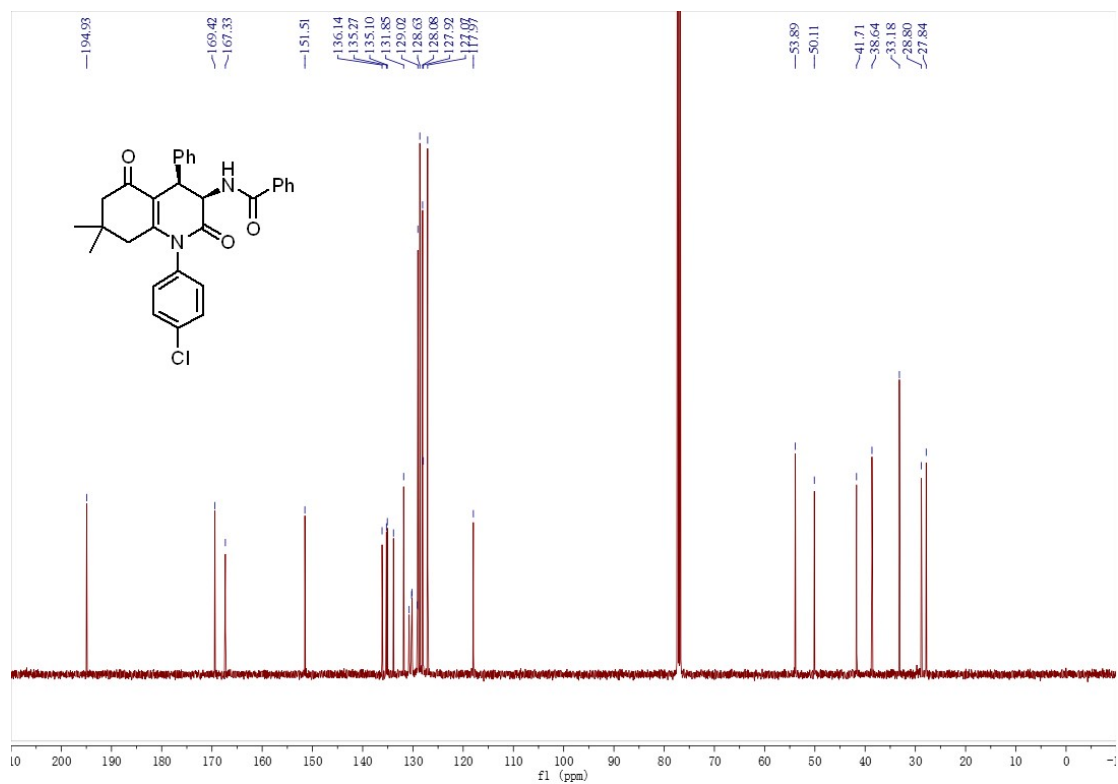

**<sup>1</sup>H and <sup>13</sup>C NMR spectra for 3g**

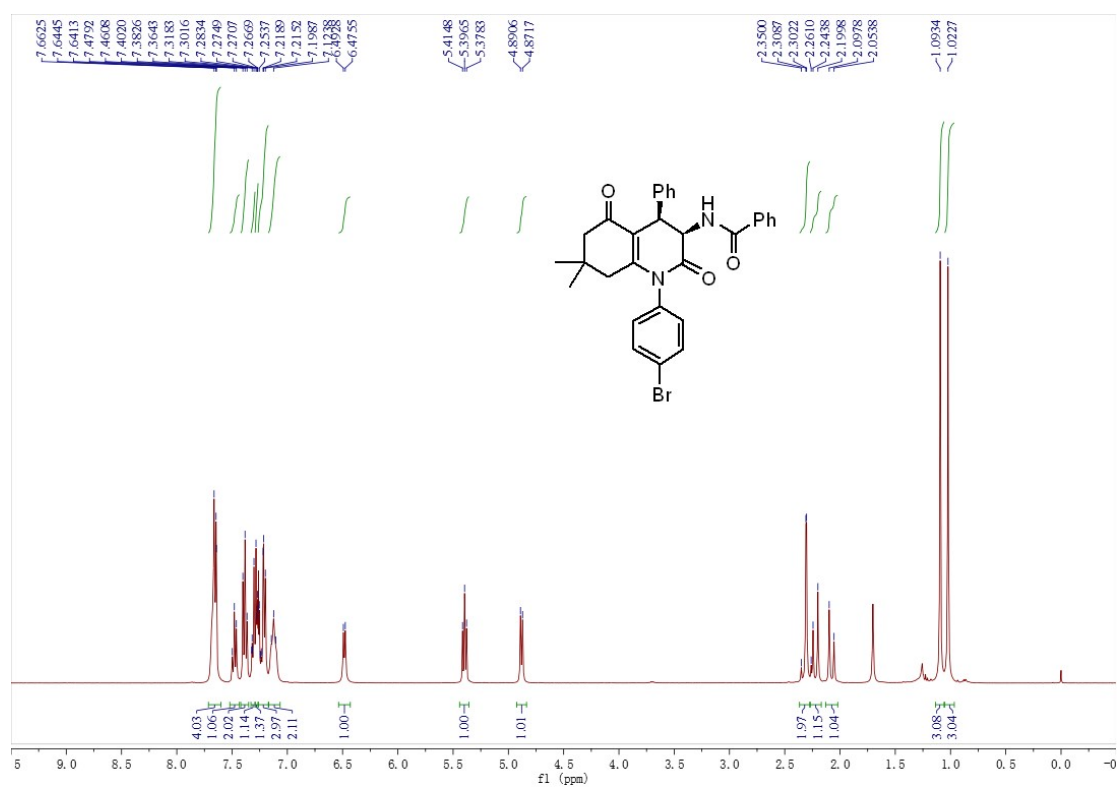

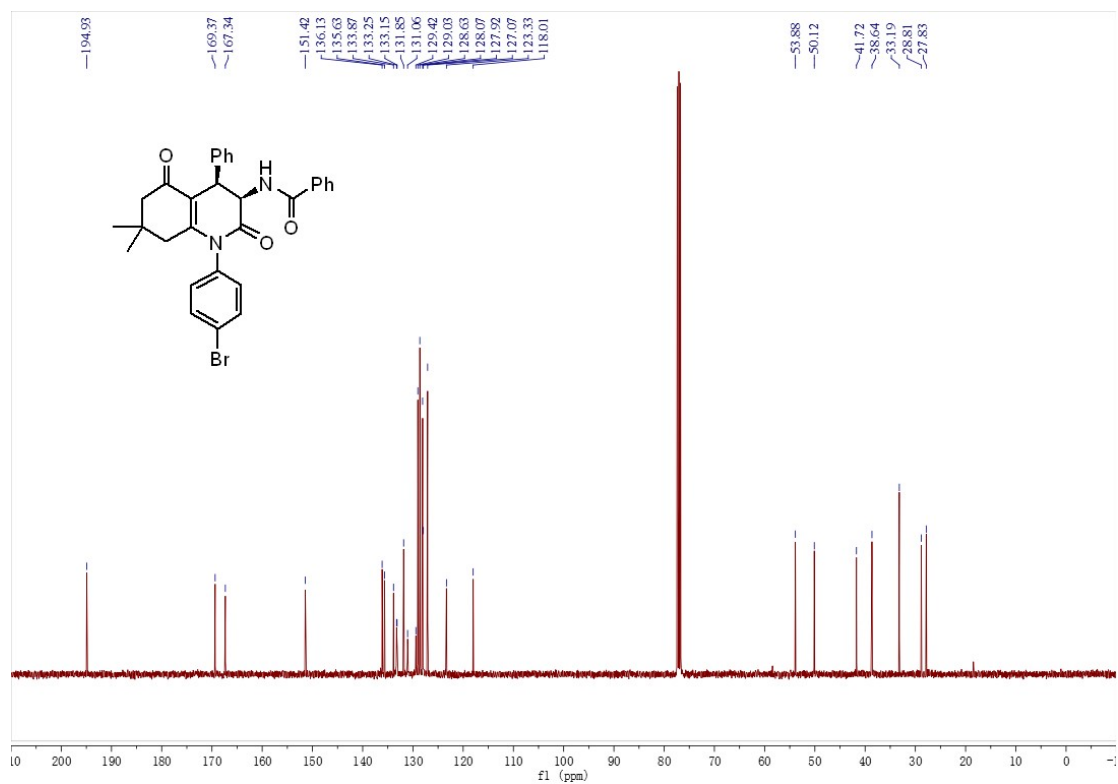

**<sup>1</sup>H and <sup>13</sup>C NMR spectra for 3h**

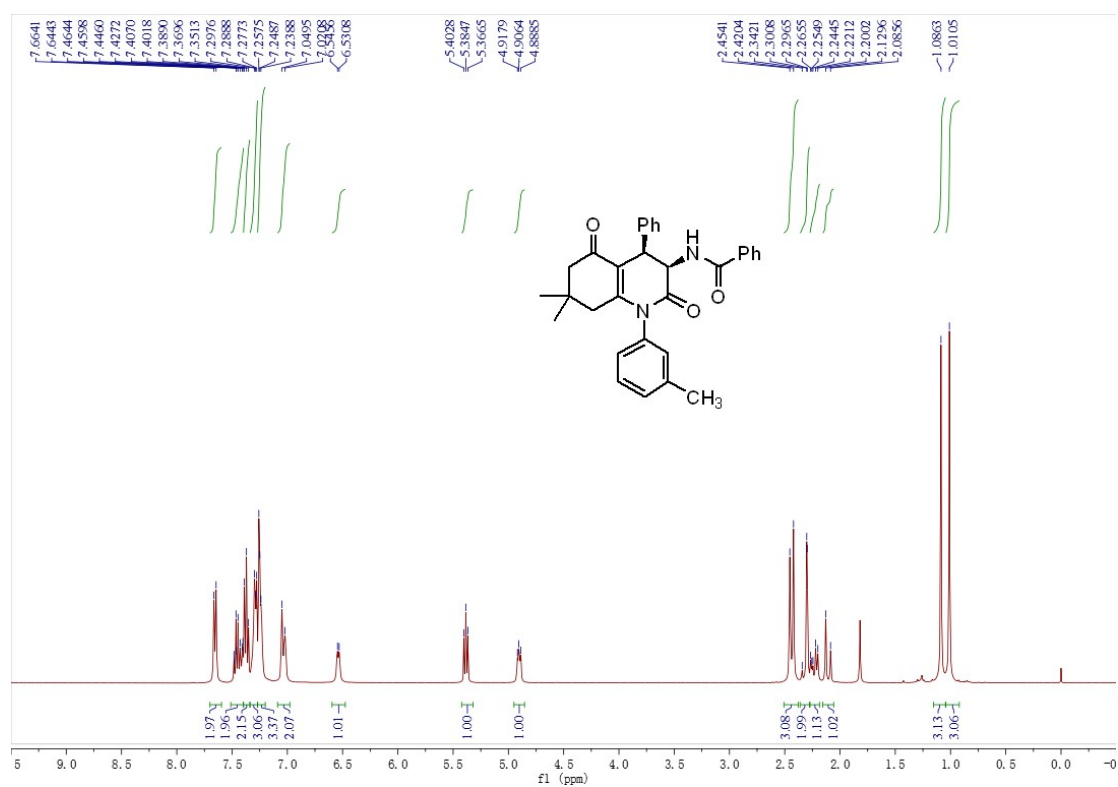



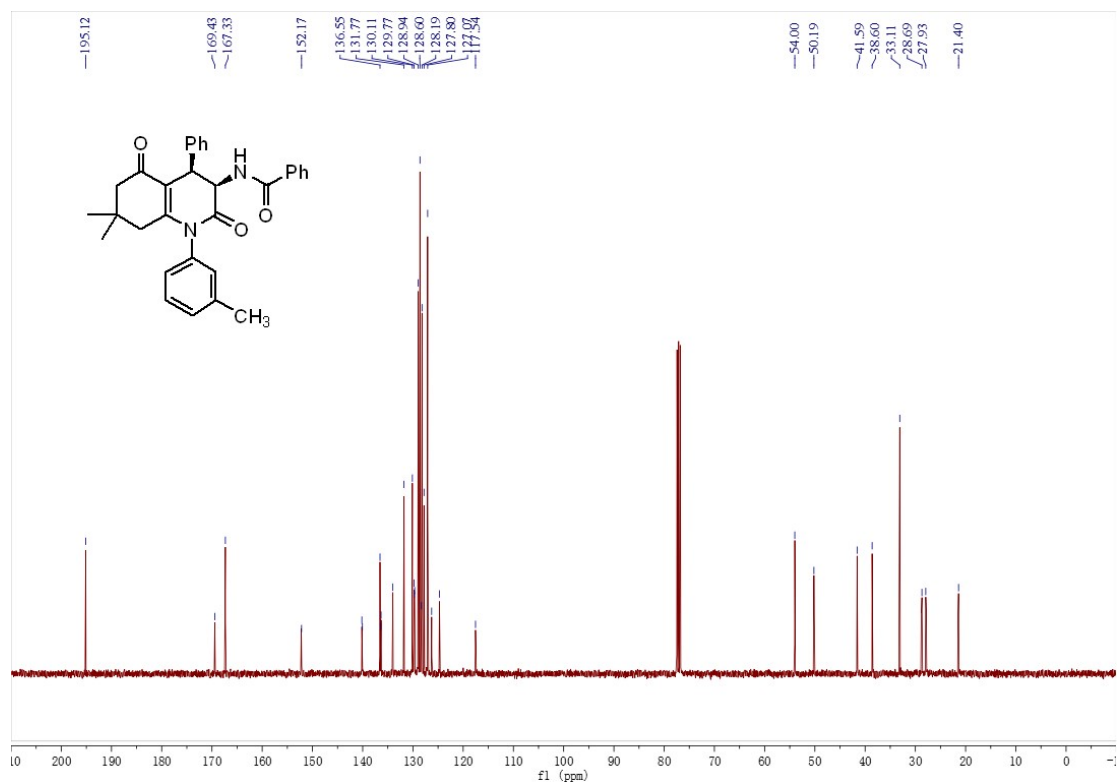

**<sup>1</sup>H and <sup>13</sup>C NMR spectra for 3i**

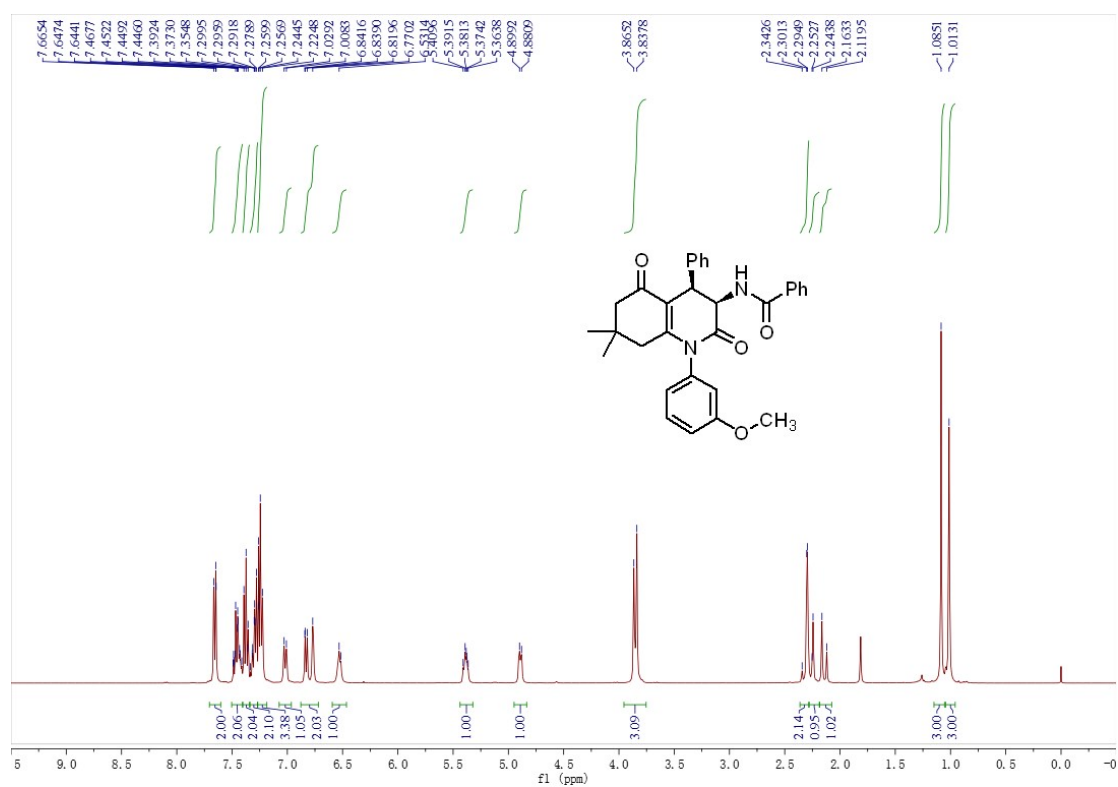

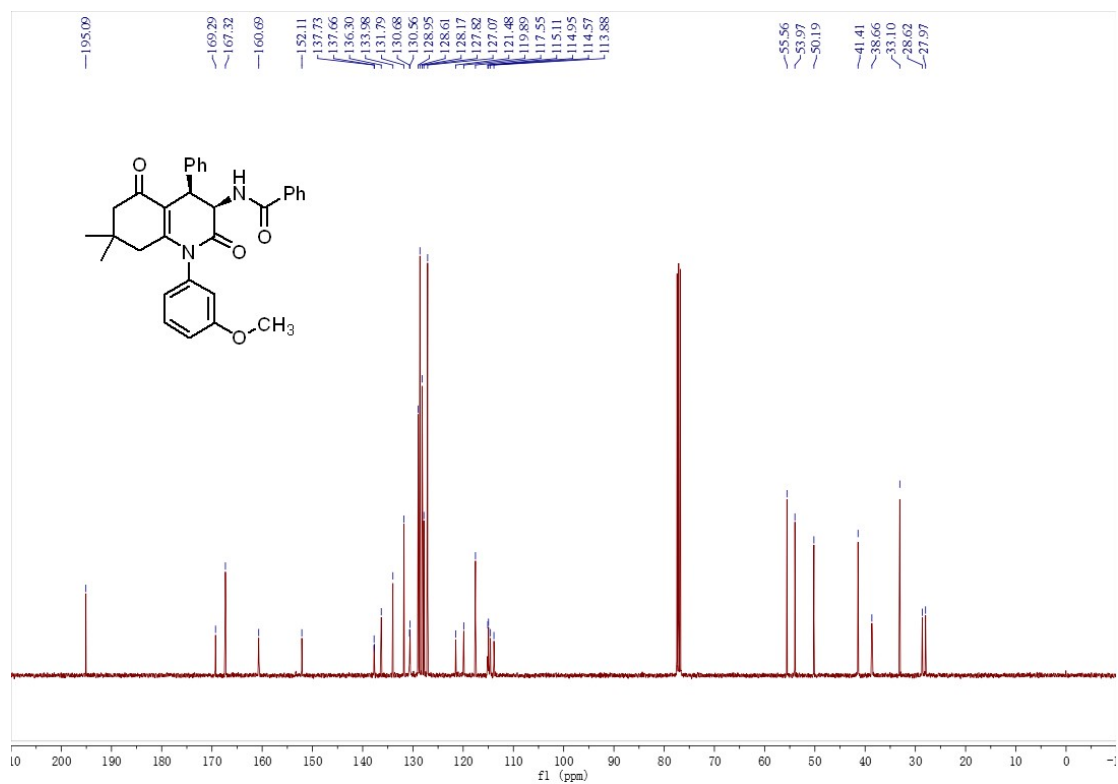

**<sup>1</sup>H, <sup>13</sup>C and <sup>19</sup>F NMR spectra for 3j**

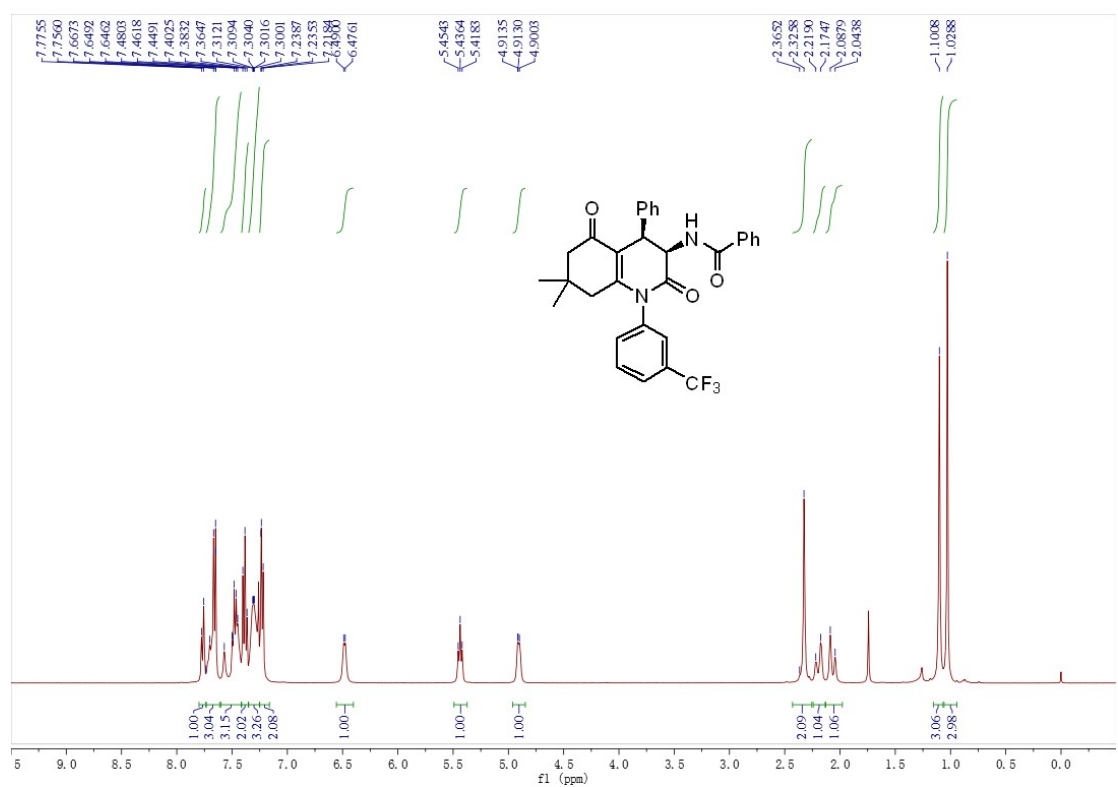

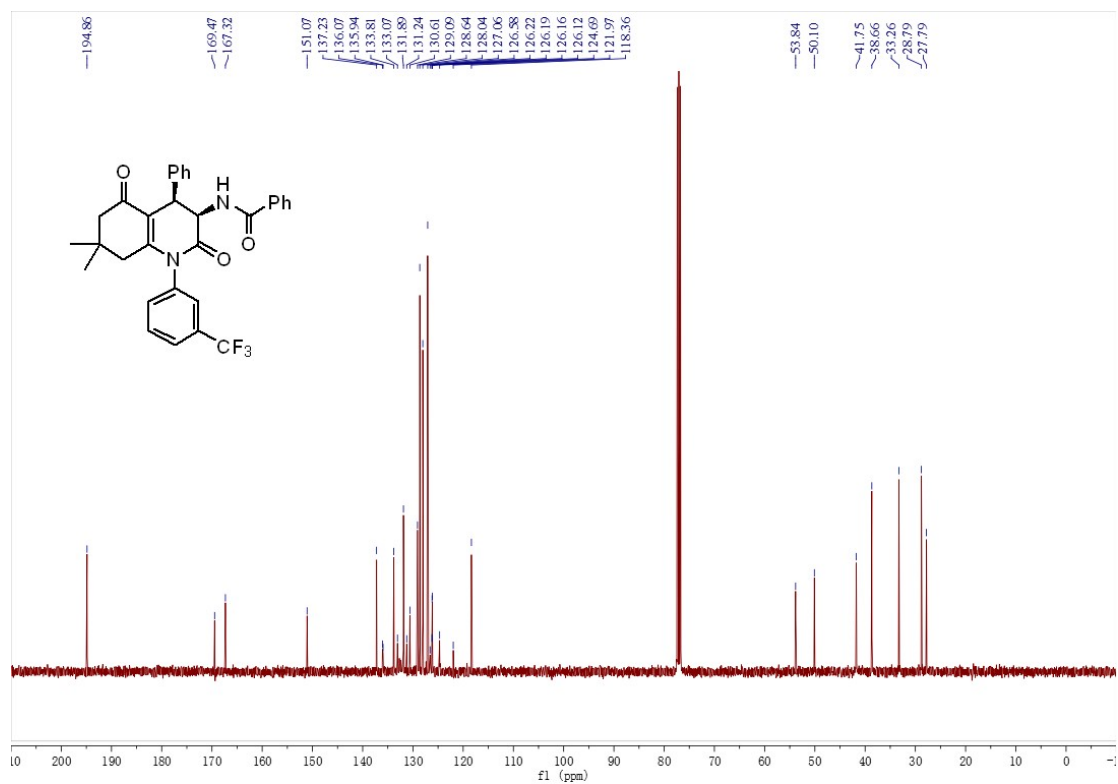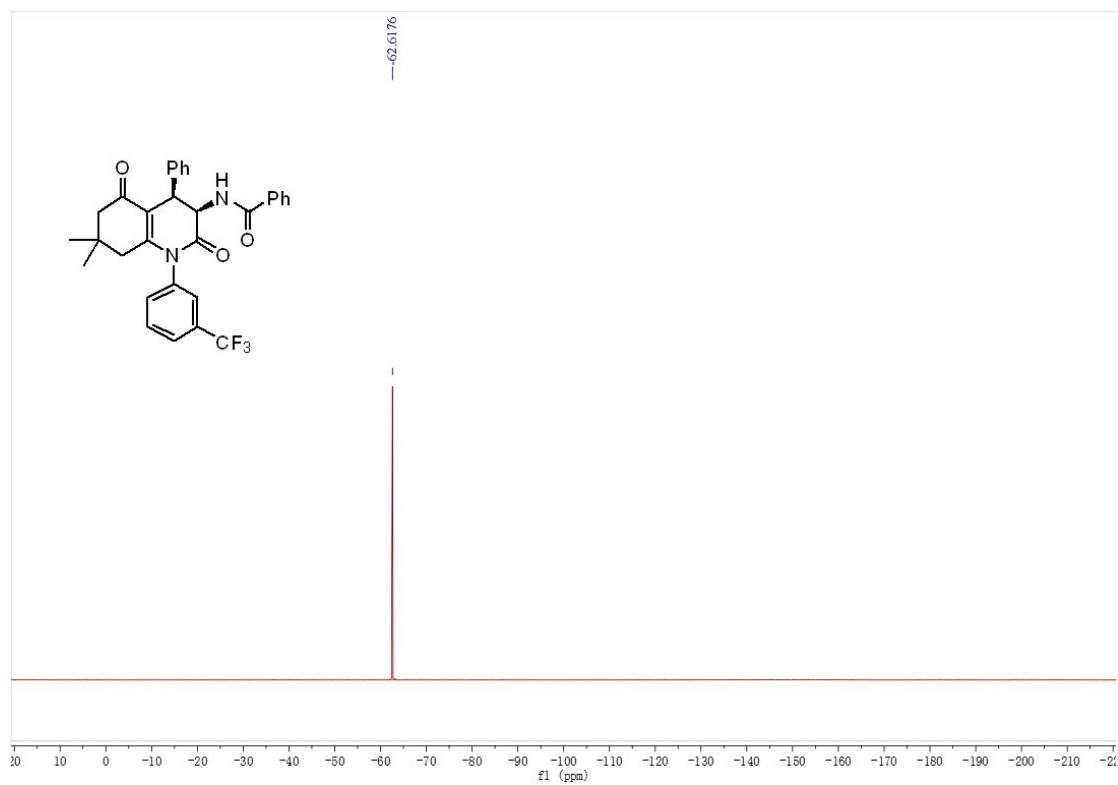

# <sup>1</sup>H, <sup>13</sup>C and <sup>19</sup>F NMR spectra for 3k

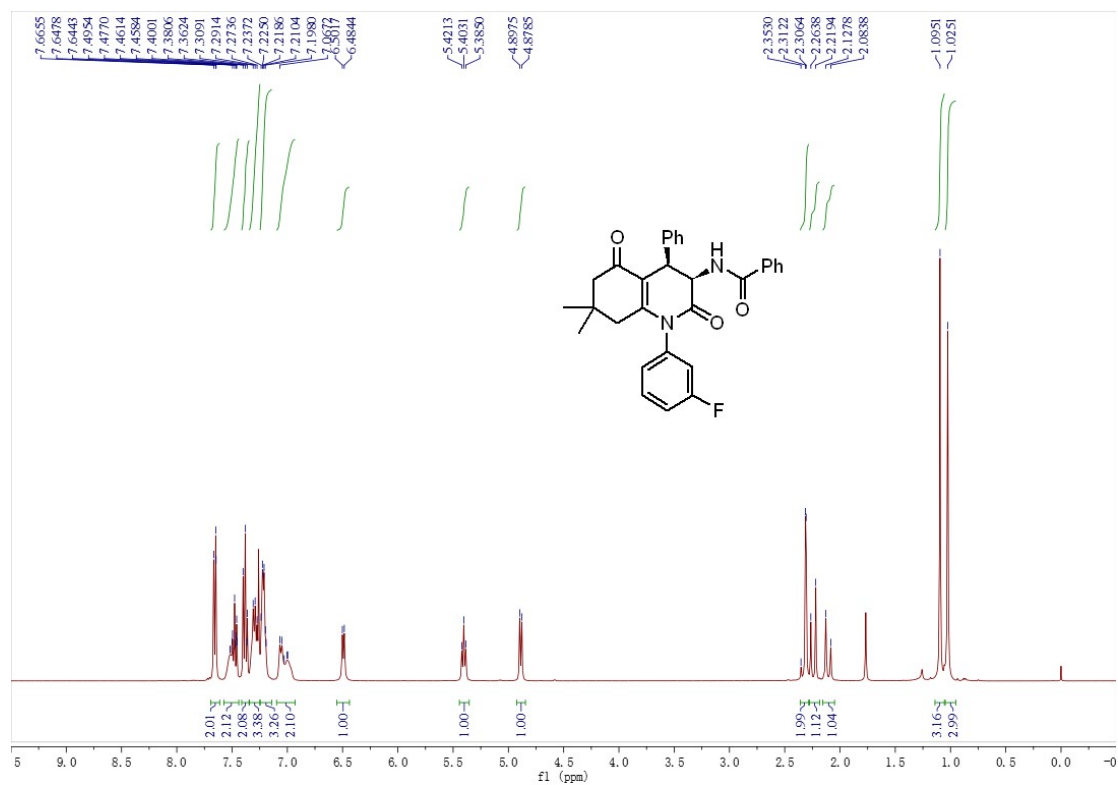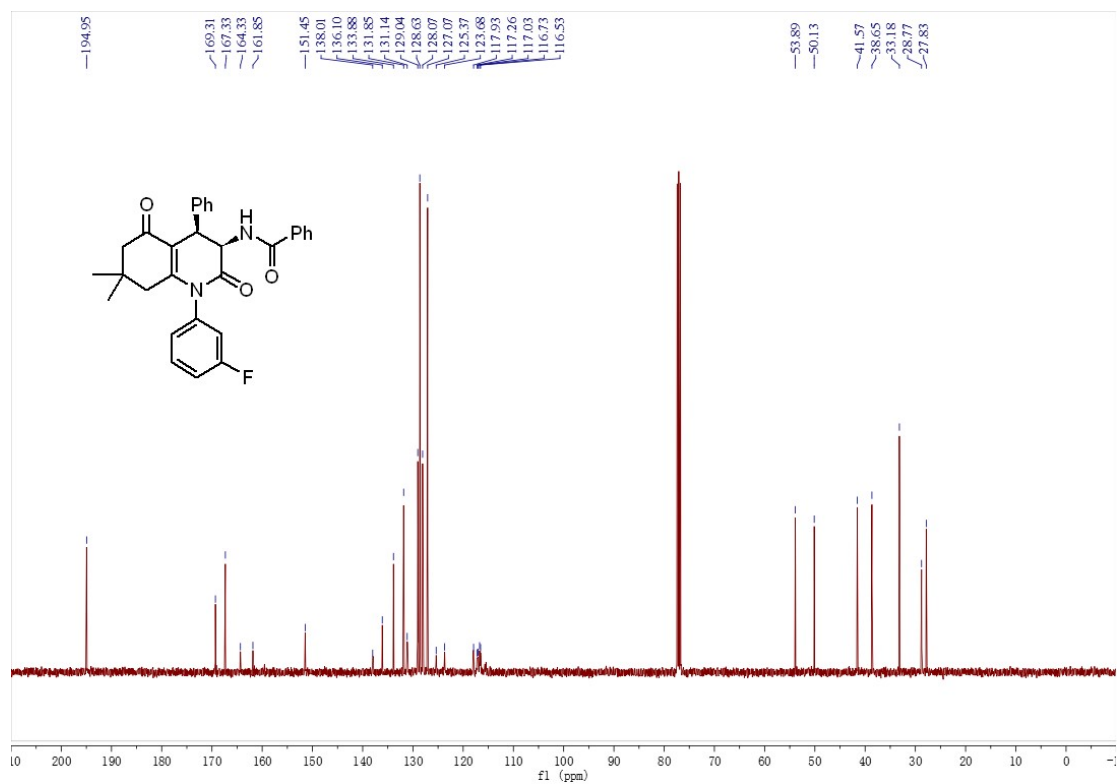

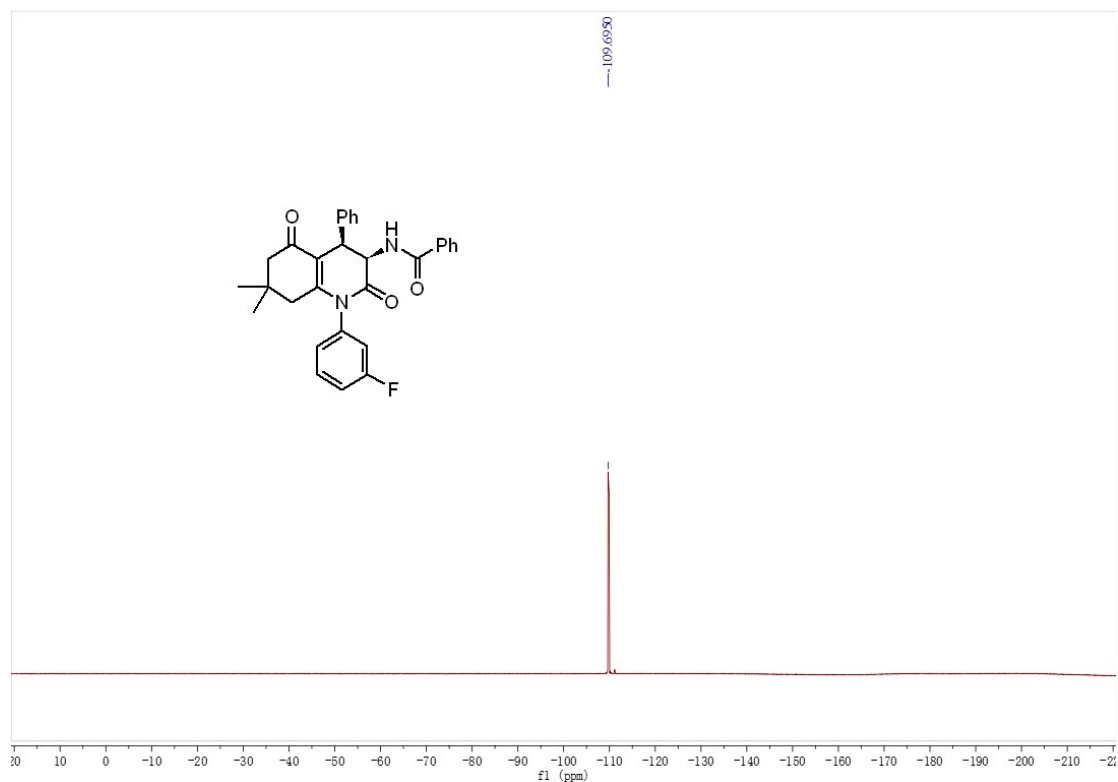

### $^1\text{H}$ and $^{13}\text{C}$ NMR spectra for 3i

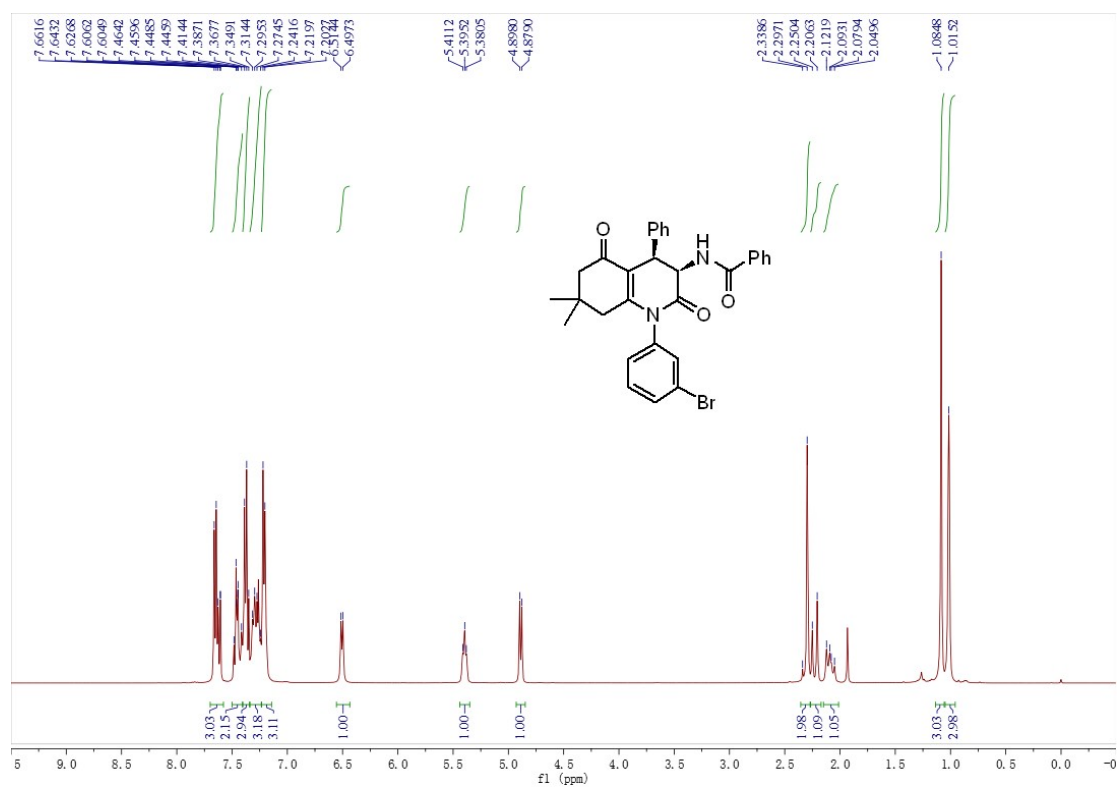

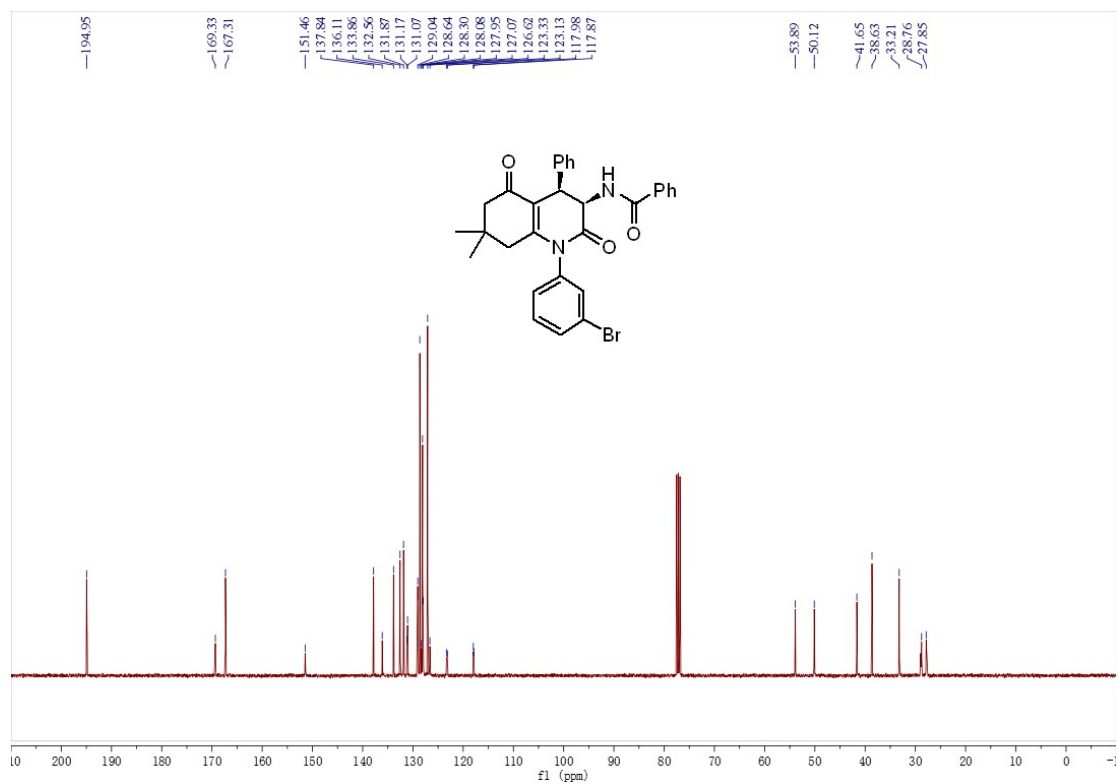

**<sup>1</sup>H, <sup>13</sup>C and <sup>19</sup>F NMR spectra for 3m**

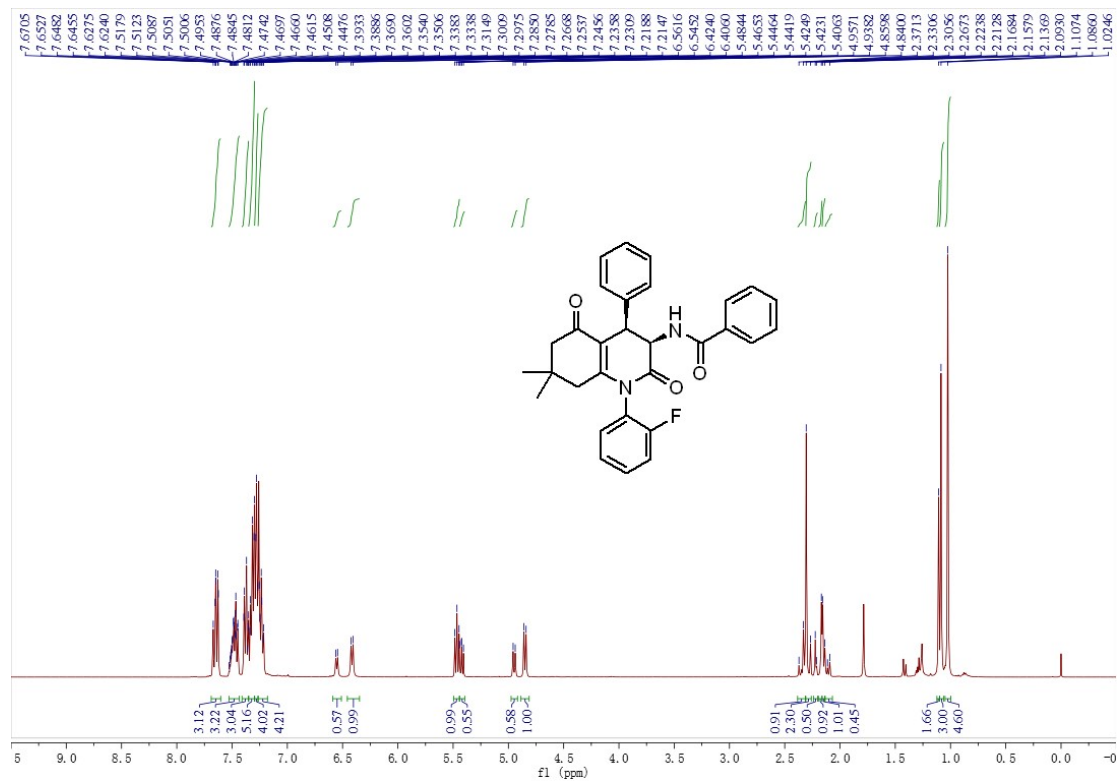

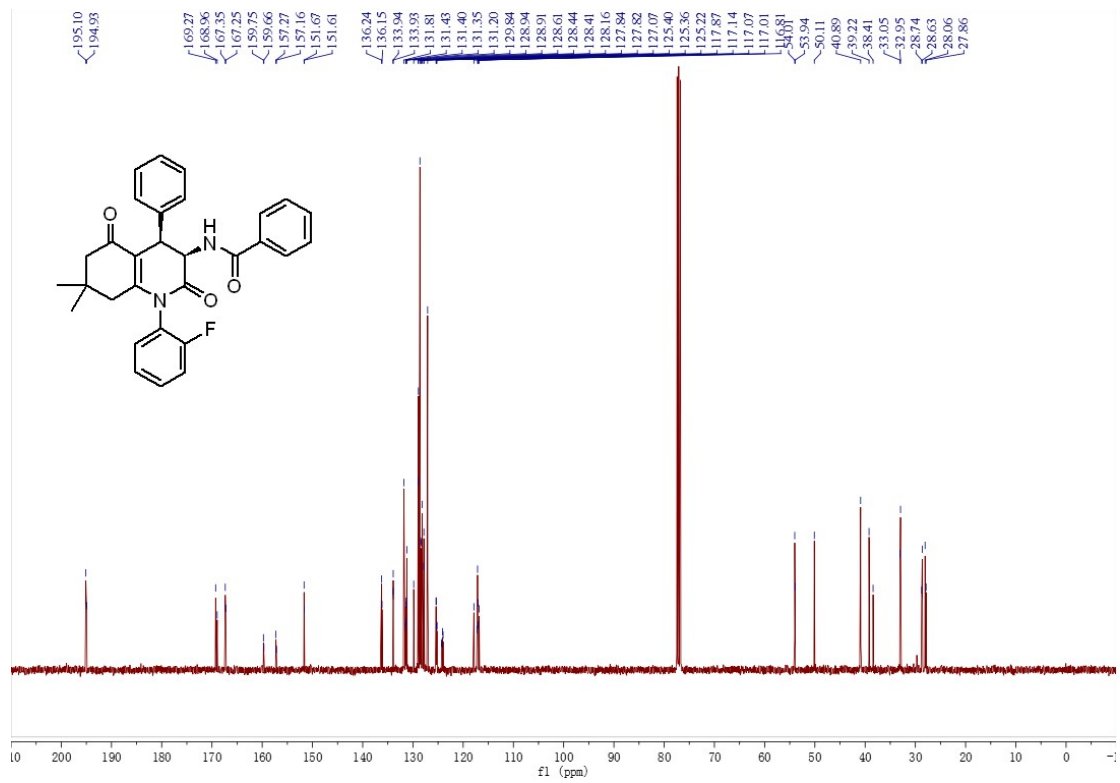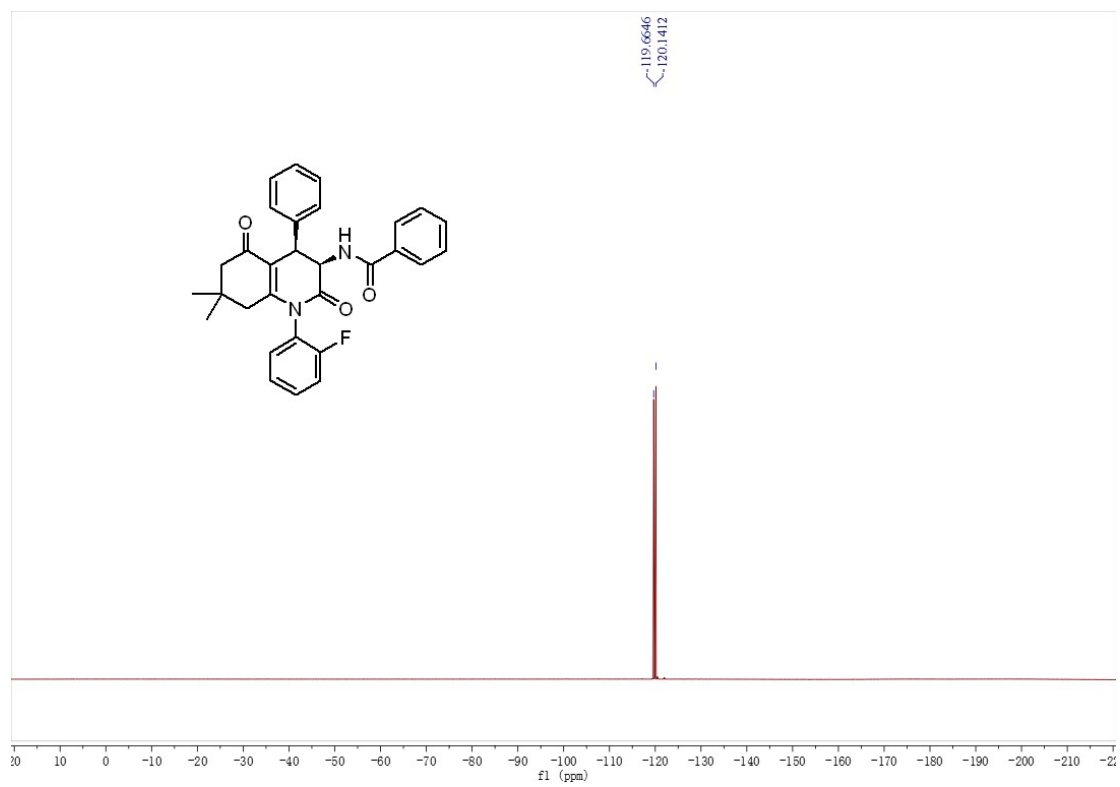

# <sup>1</sup>H and <sup>13</sup>C NMR spectra for 3n

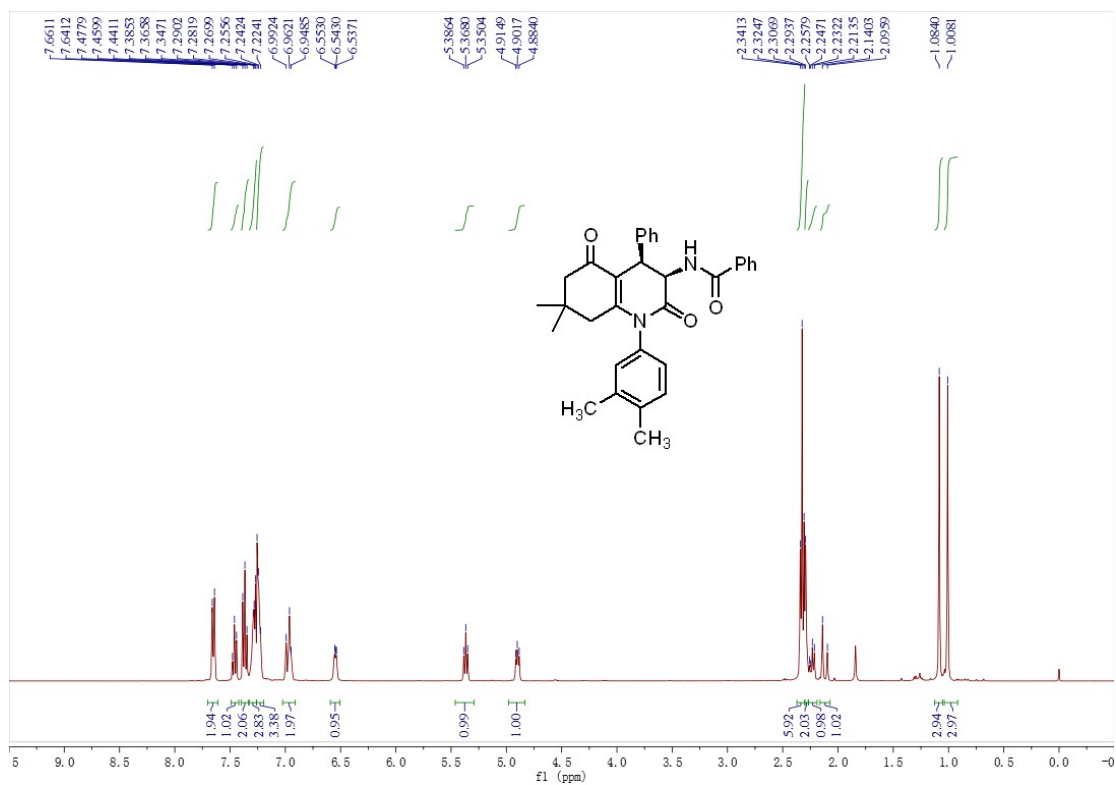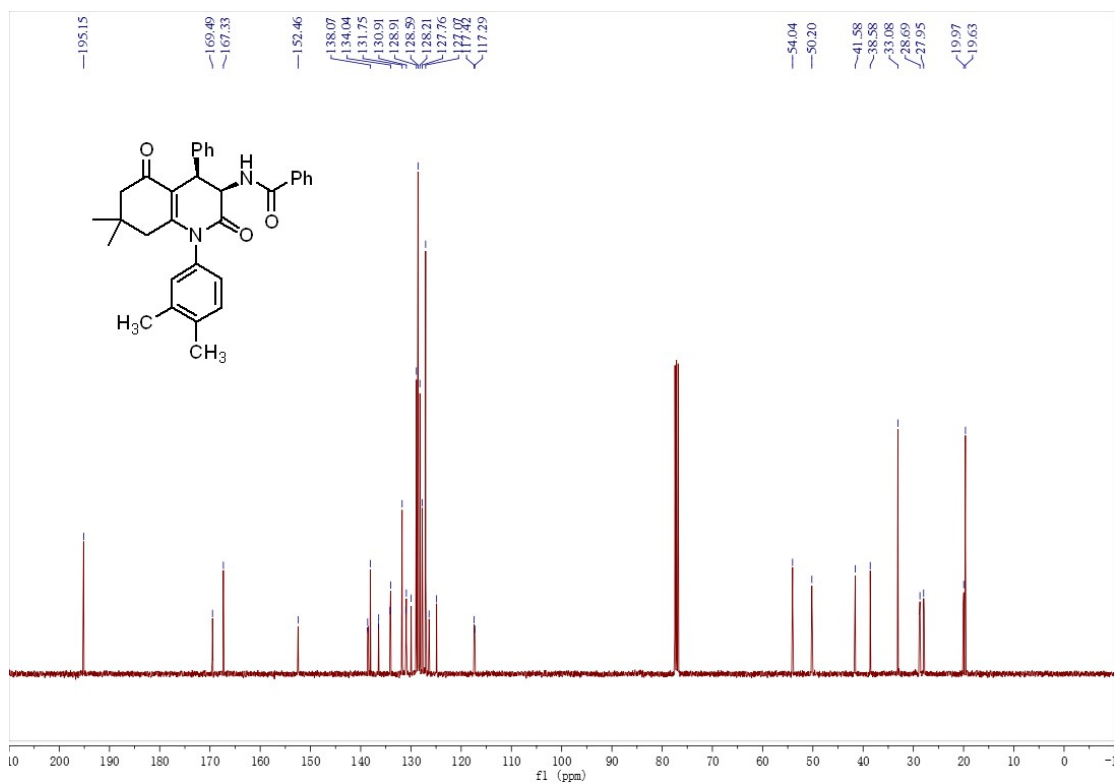



### <sup>1</sup>H, <sup>13</sup>C and <sup>19</sup>F NMR spectra for 30

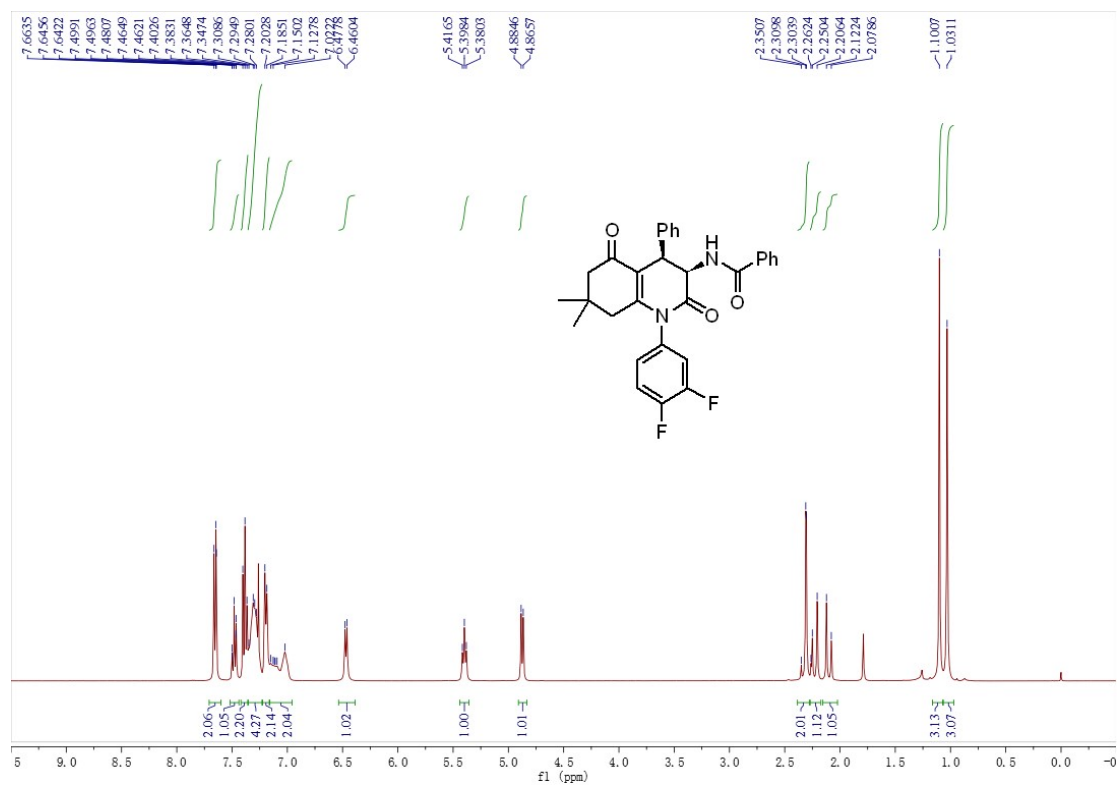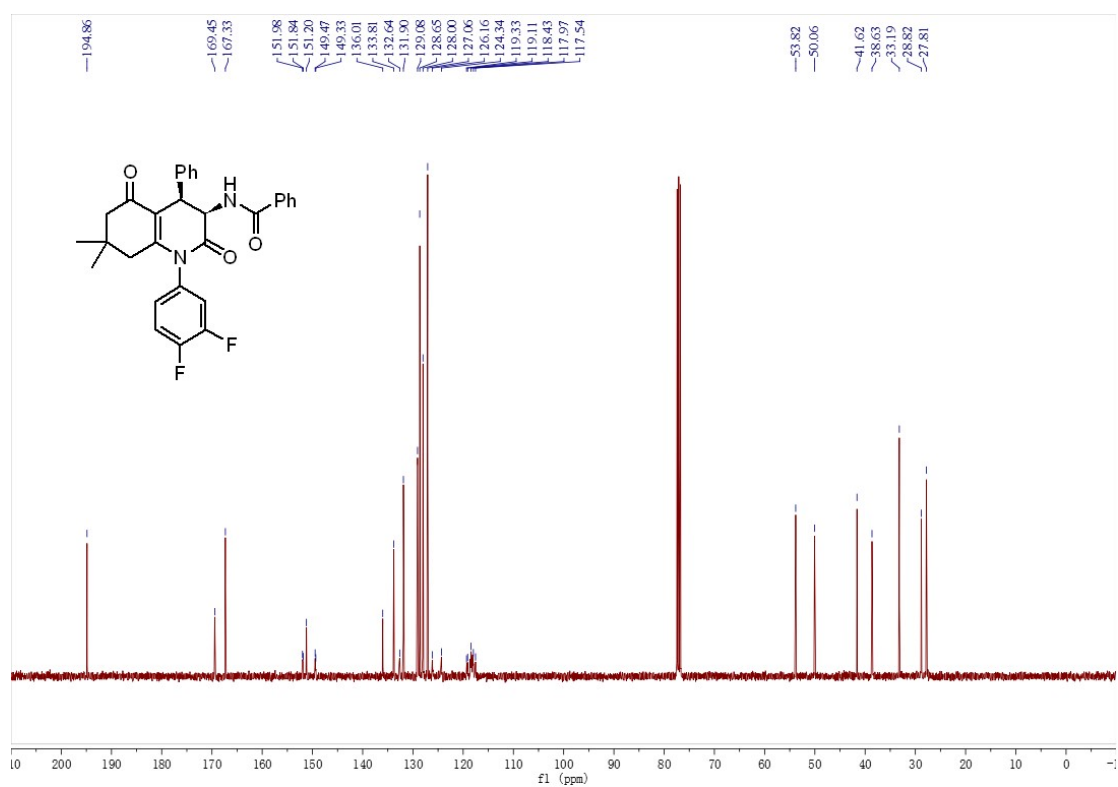

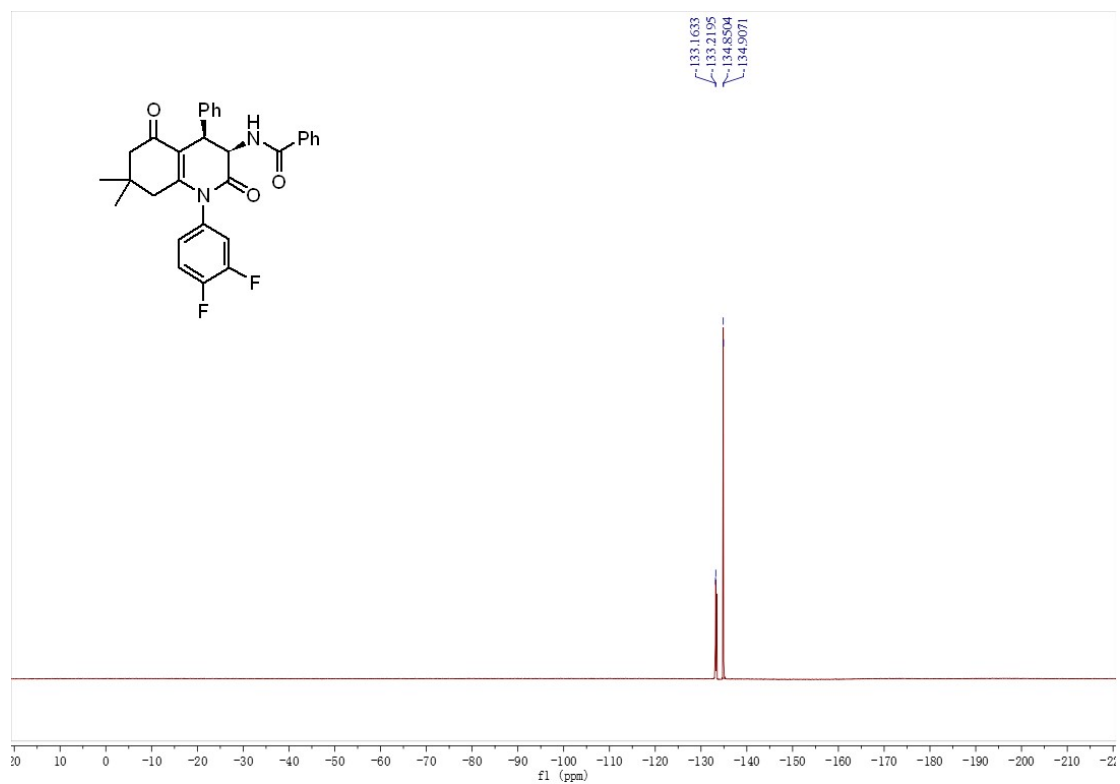

### $^1\text{H}$ and $^{13}\text{C}$ NMR spectra for 3p

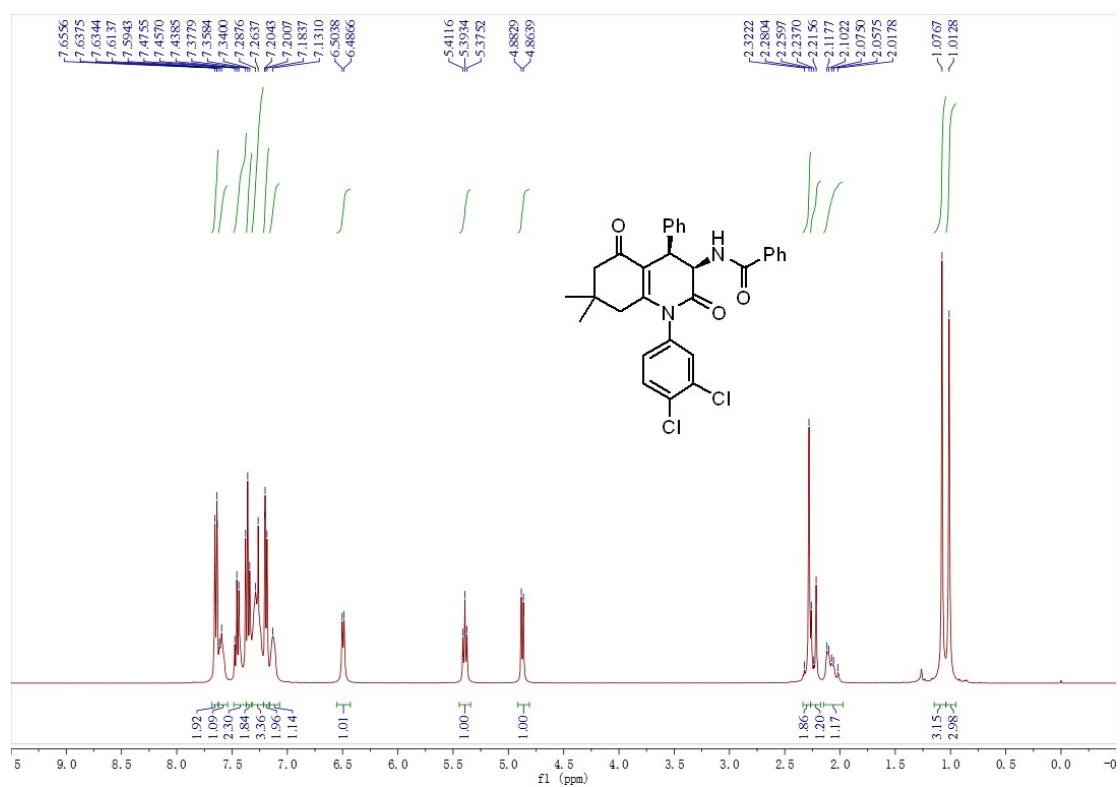

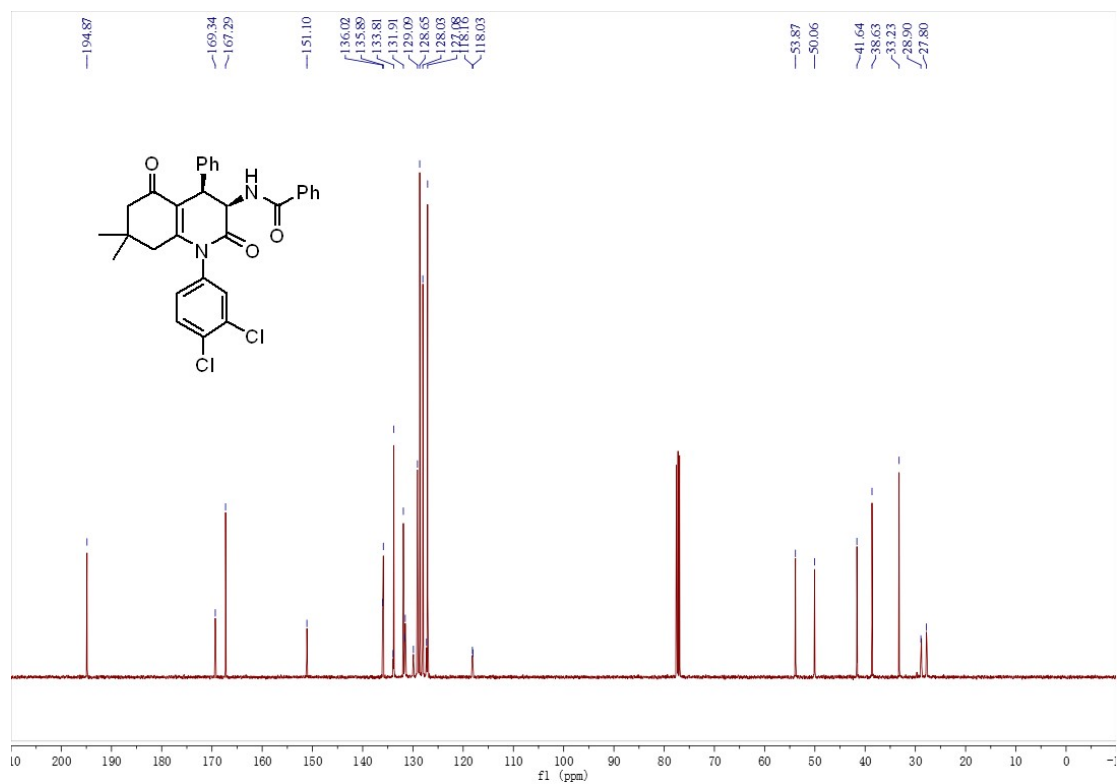

**<sup>1</sup>H, <sup>13</sup>C and <sup>19</sup>F NMR spectra for 3q**

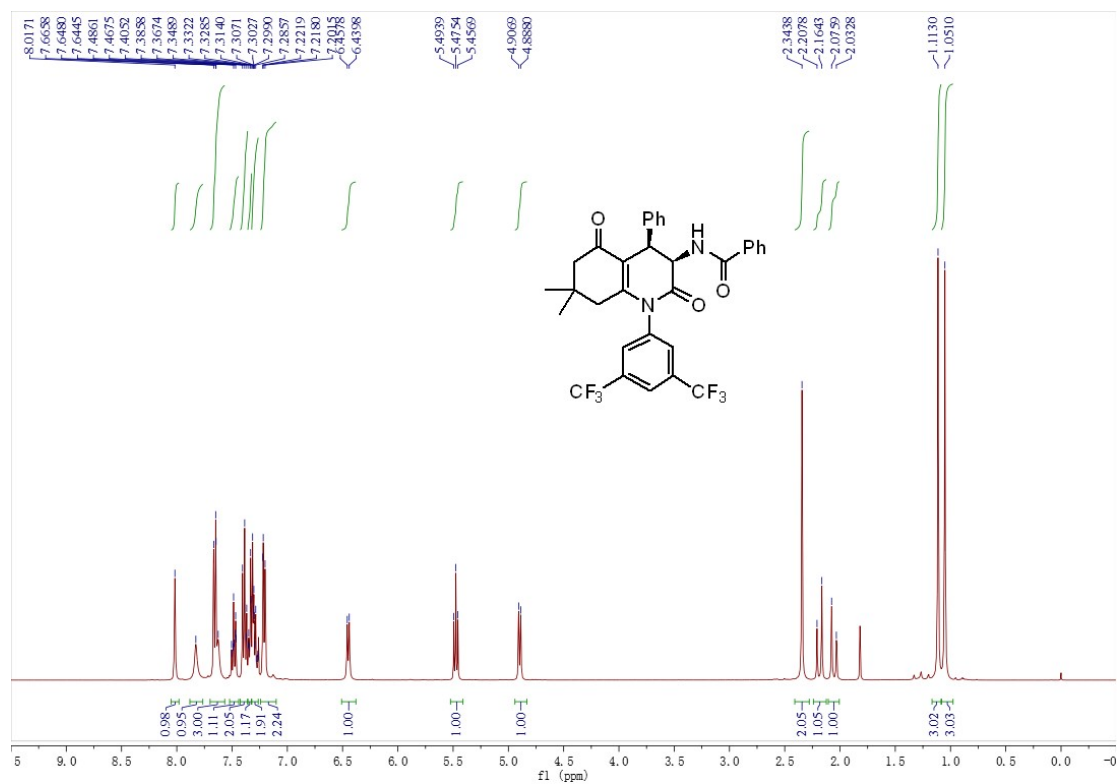

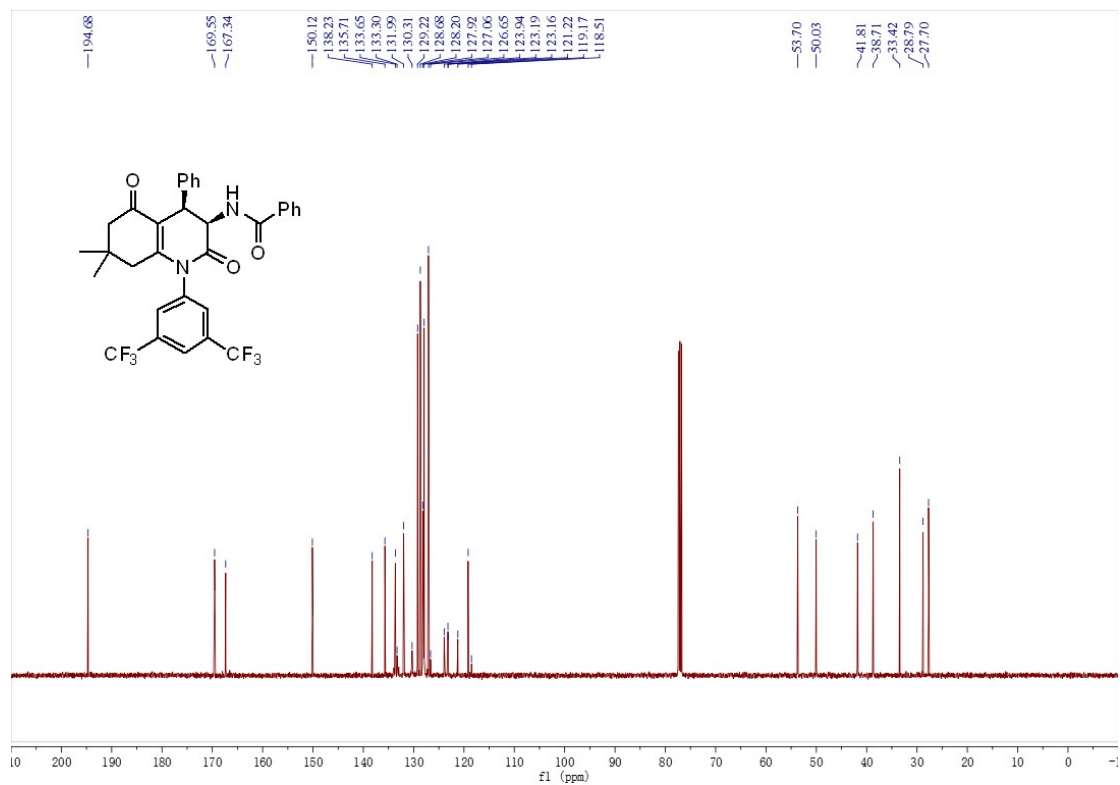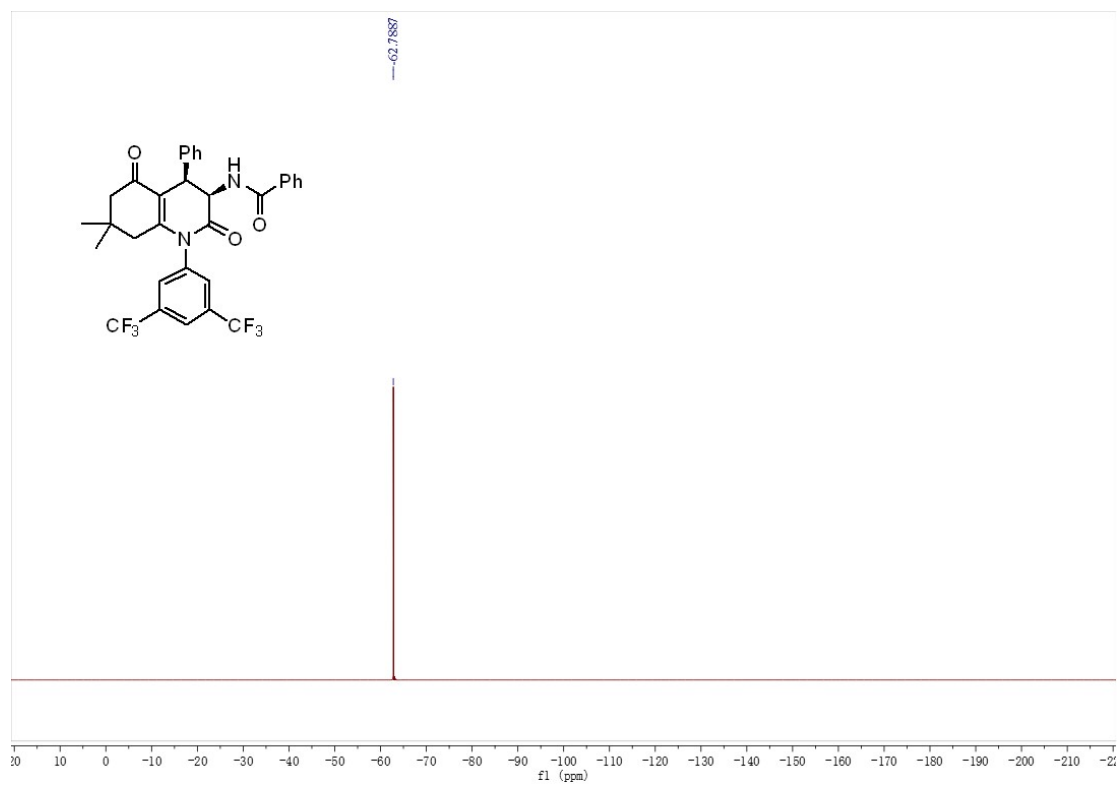

# <sup>1</sup>H and <sup>13</sup>C NMR spectra for 3r

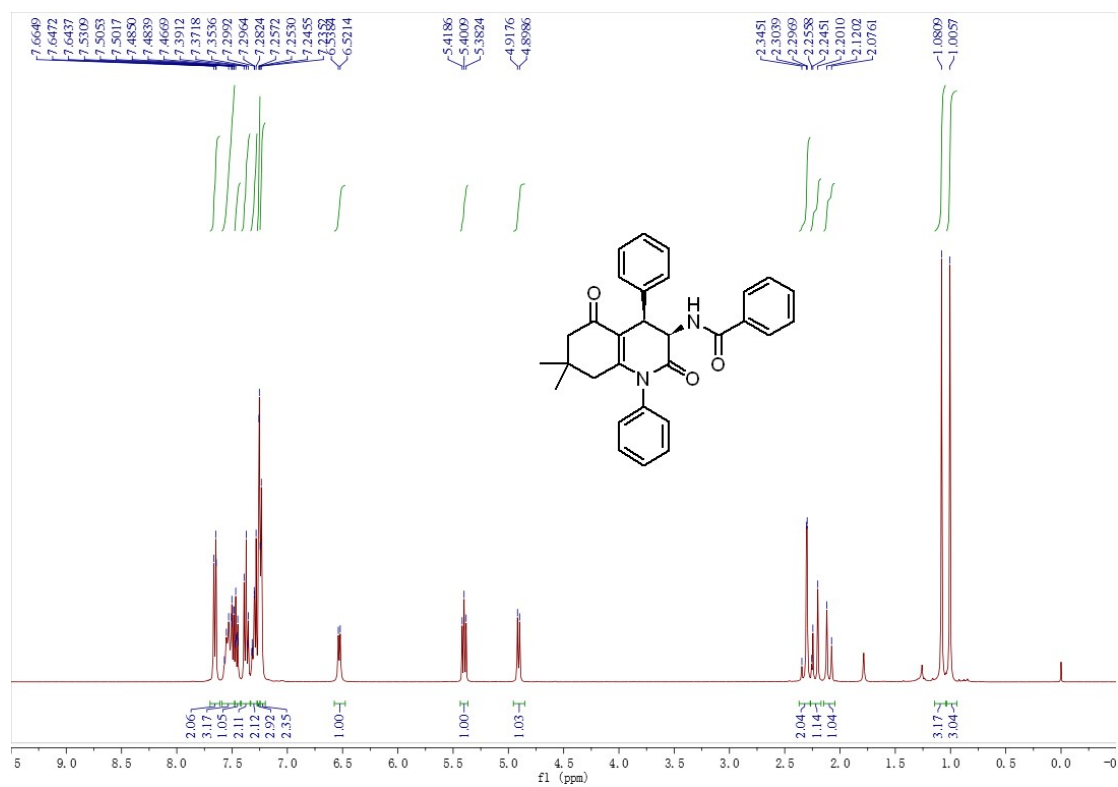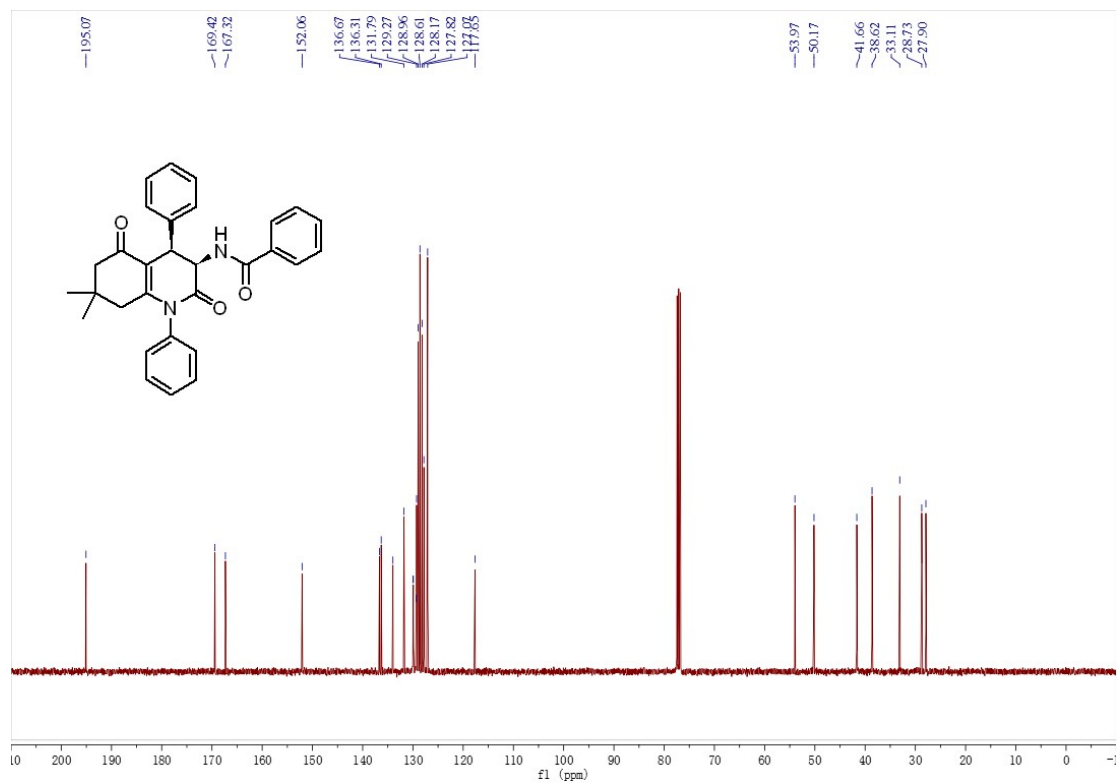

# <sup>1</sup>H and <sup>13</sup>C NMR spectra for 3s

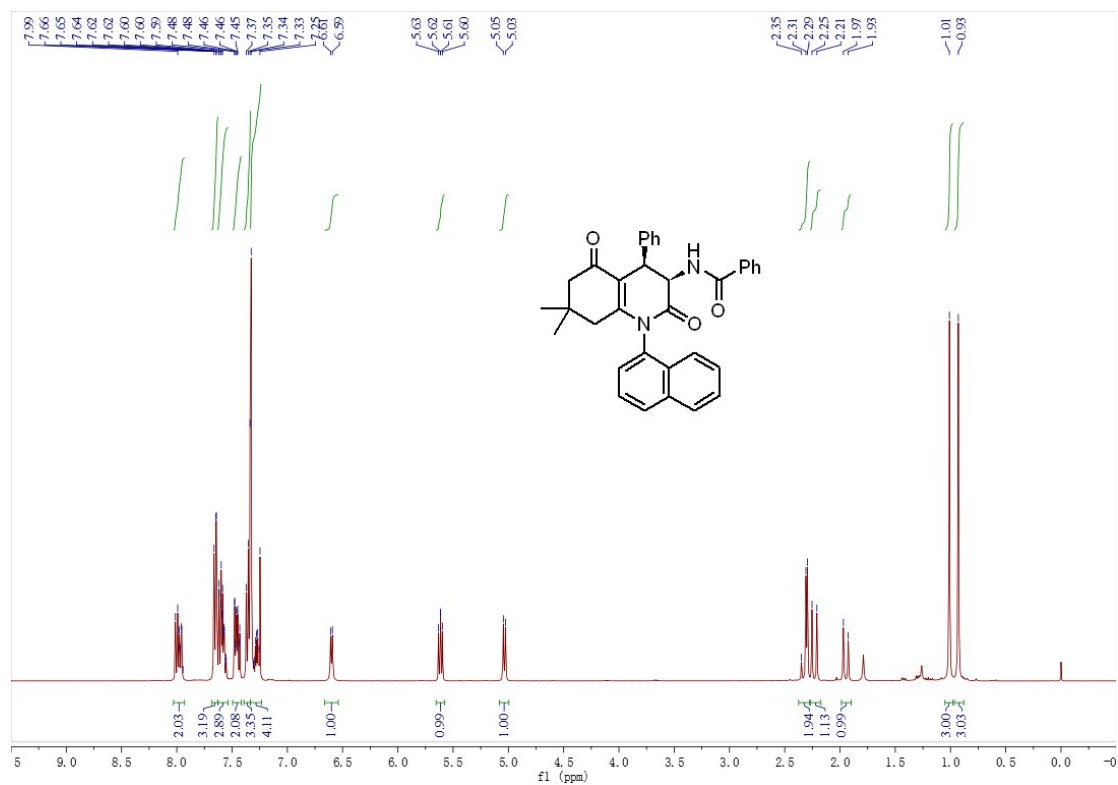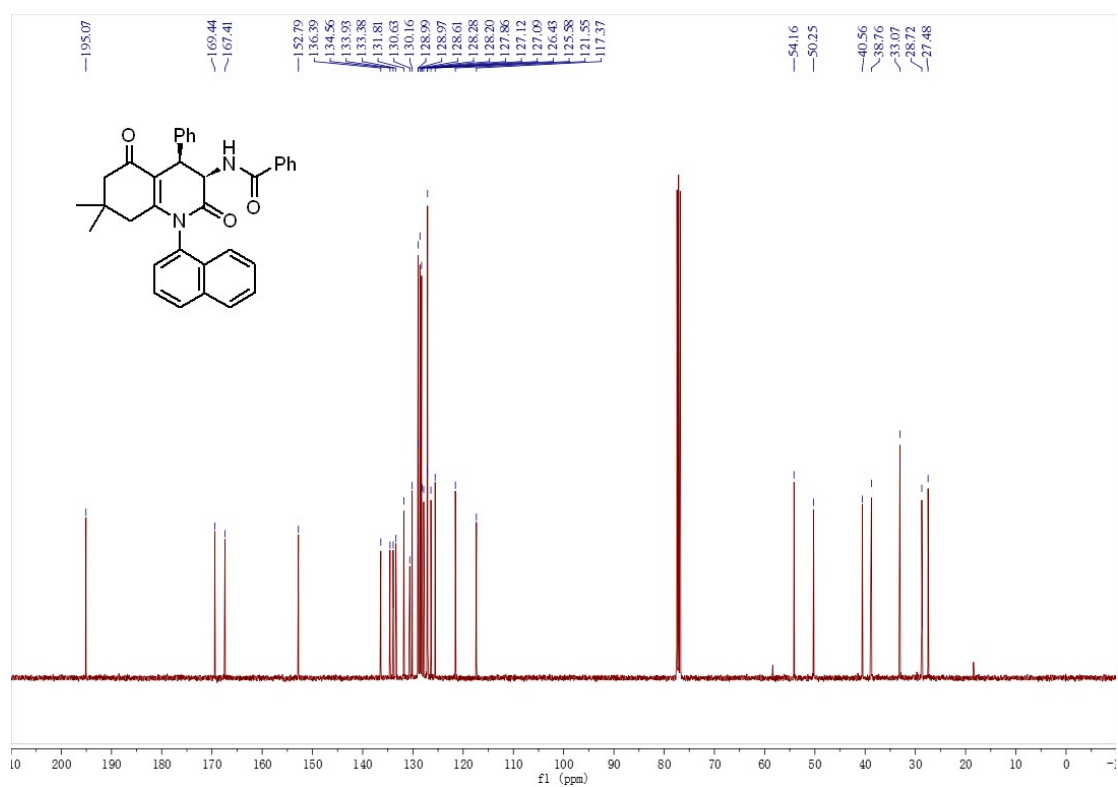

# <sup>1</sup>H and <sup>13</sup>C NMR spectra for 3t

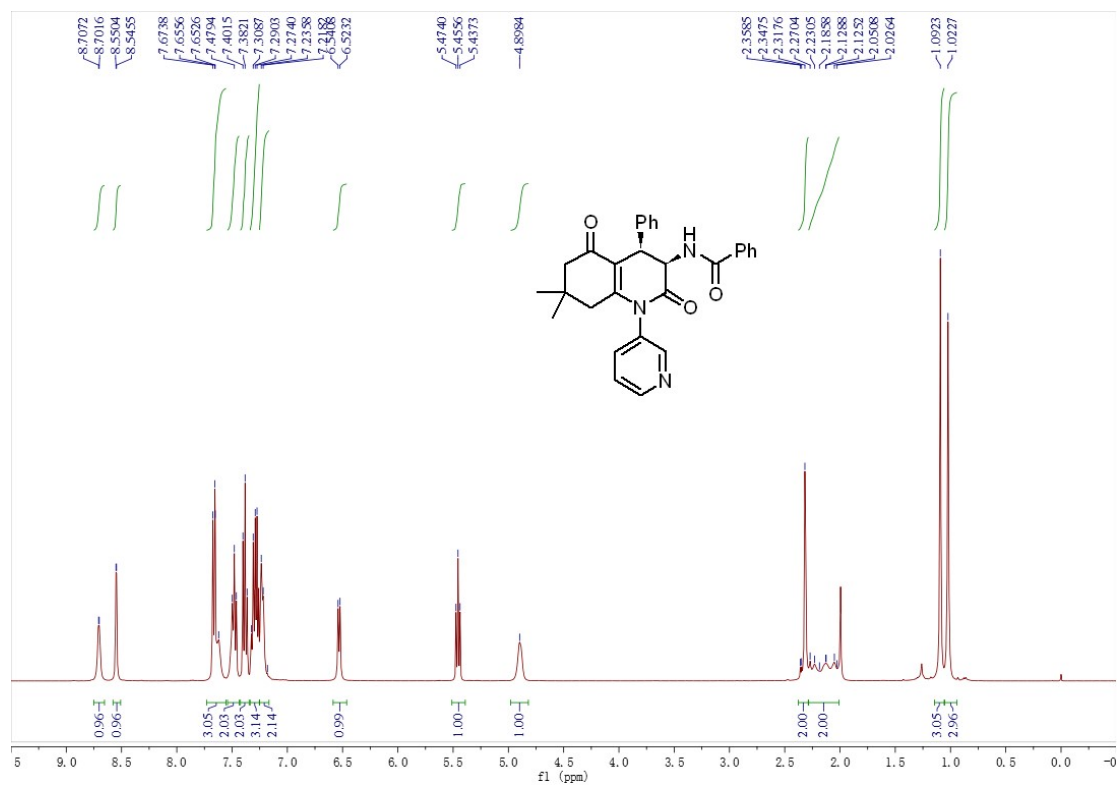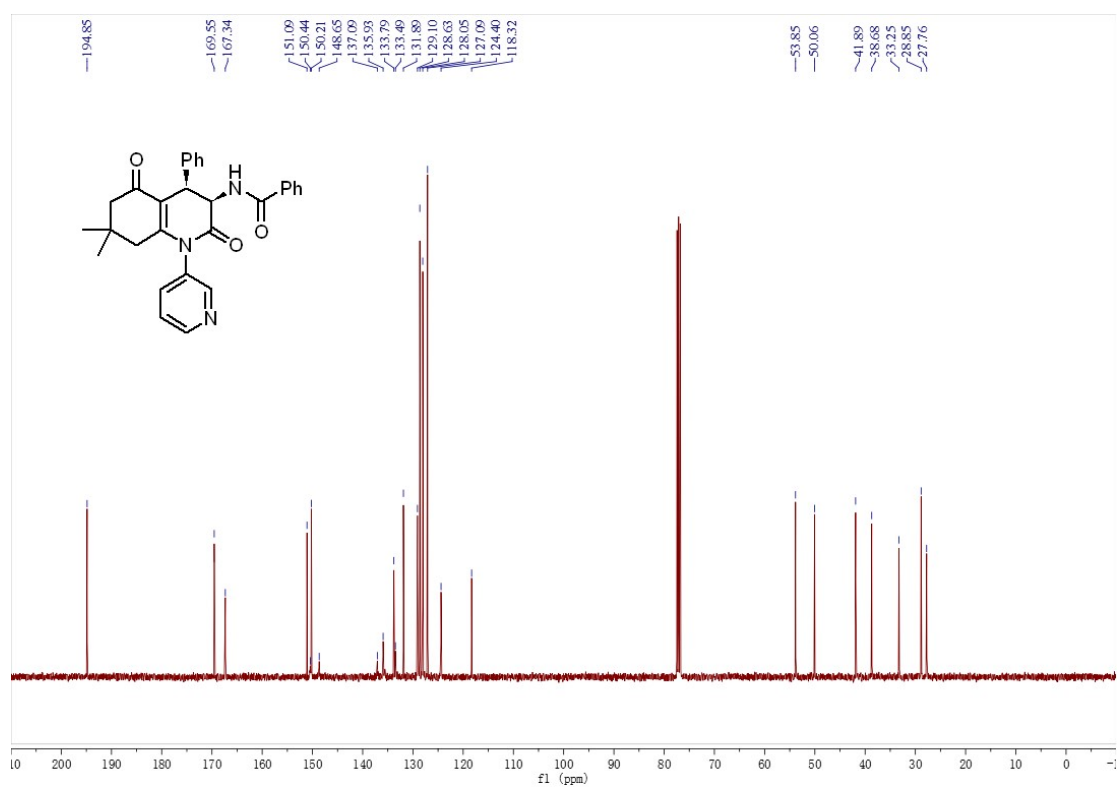

# <sup>1</sup>H and <sup>13</sup>C NMR spectra for 3u

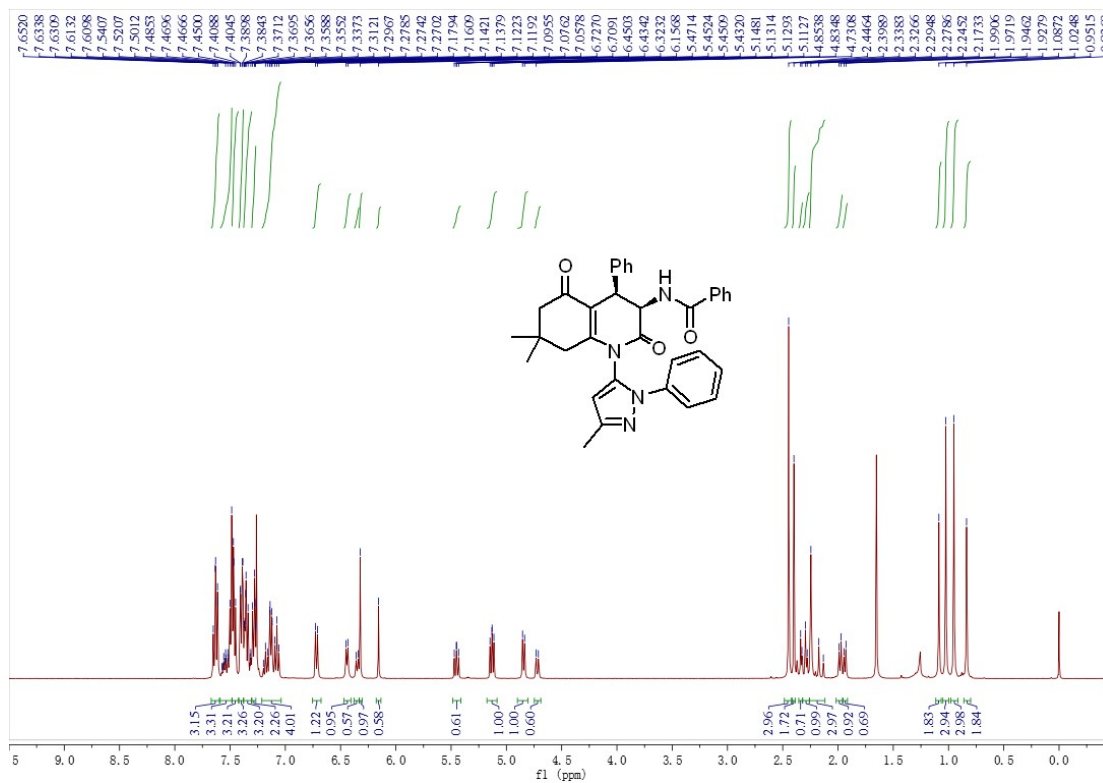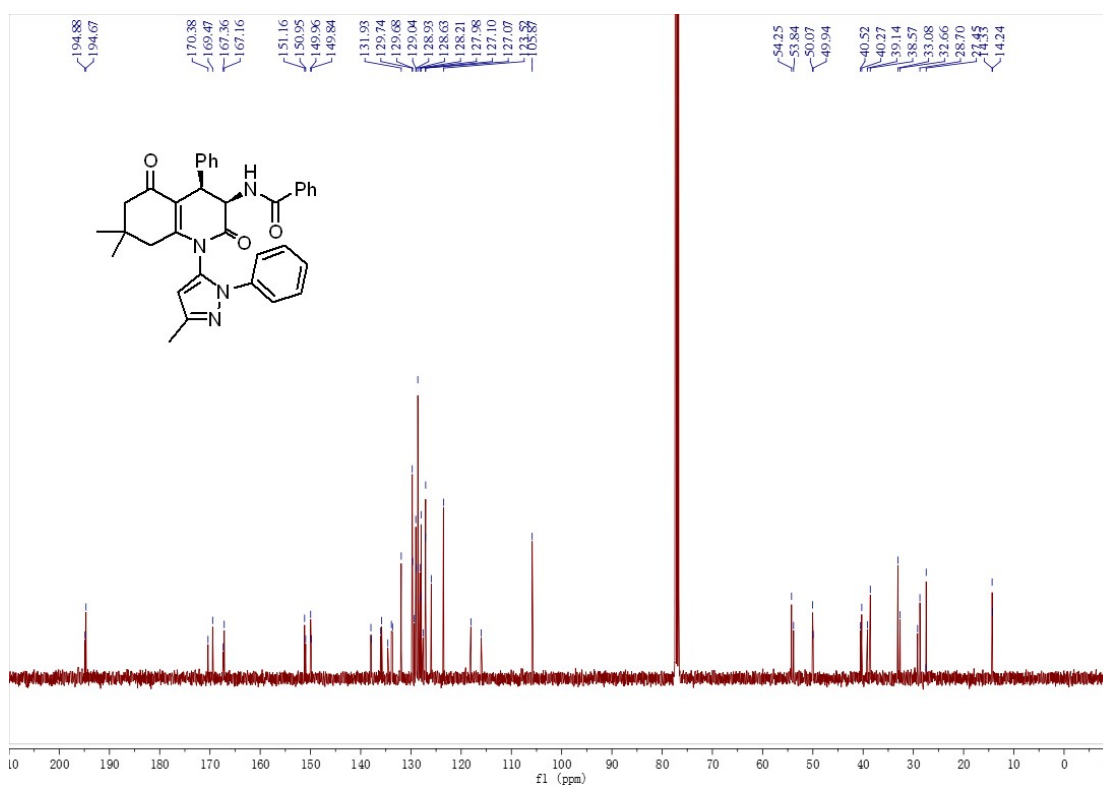



# <sup>1</sup>H and <sup>13</sup>C NMR spectra for 3v

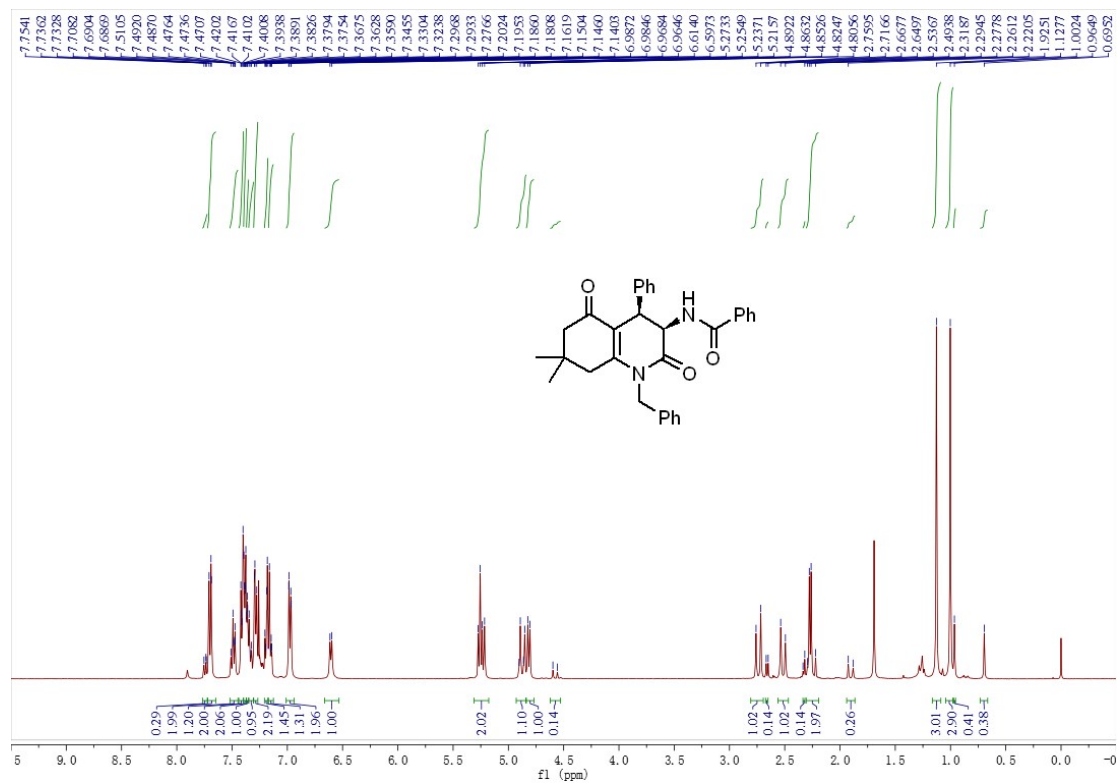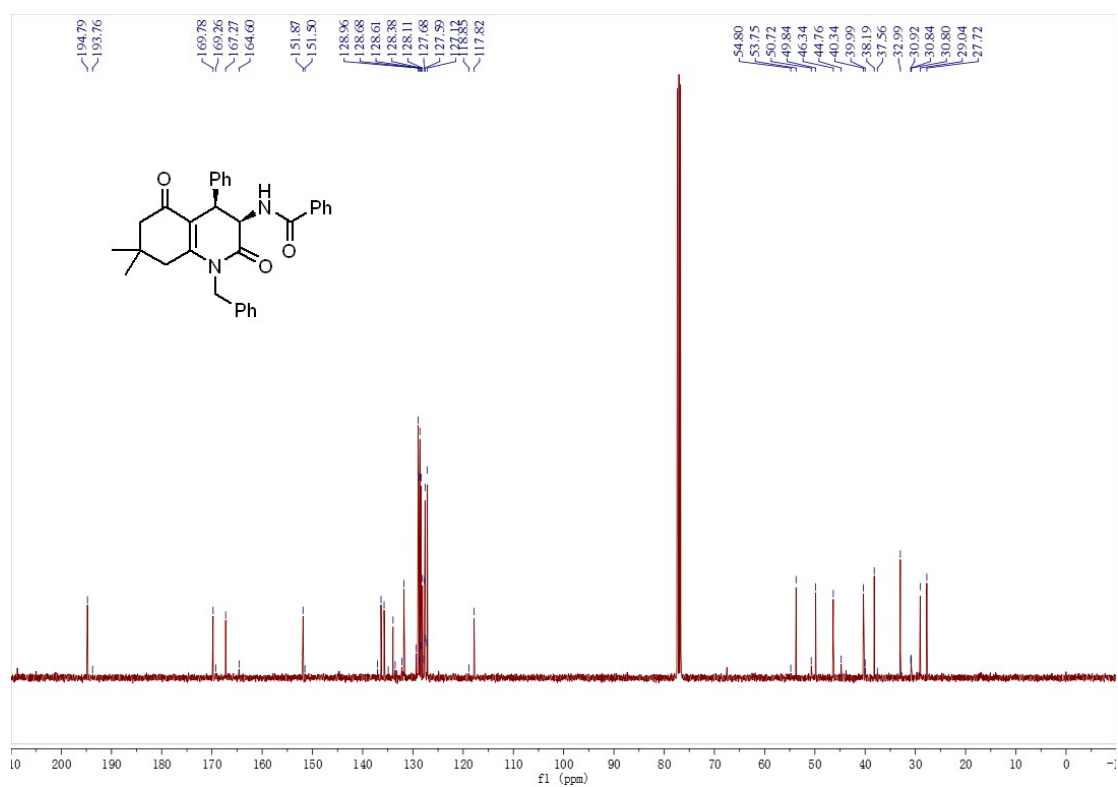

# <sup>1</sup>H and <sup>13</sup>C NMR spectra for 3x

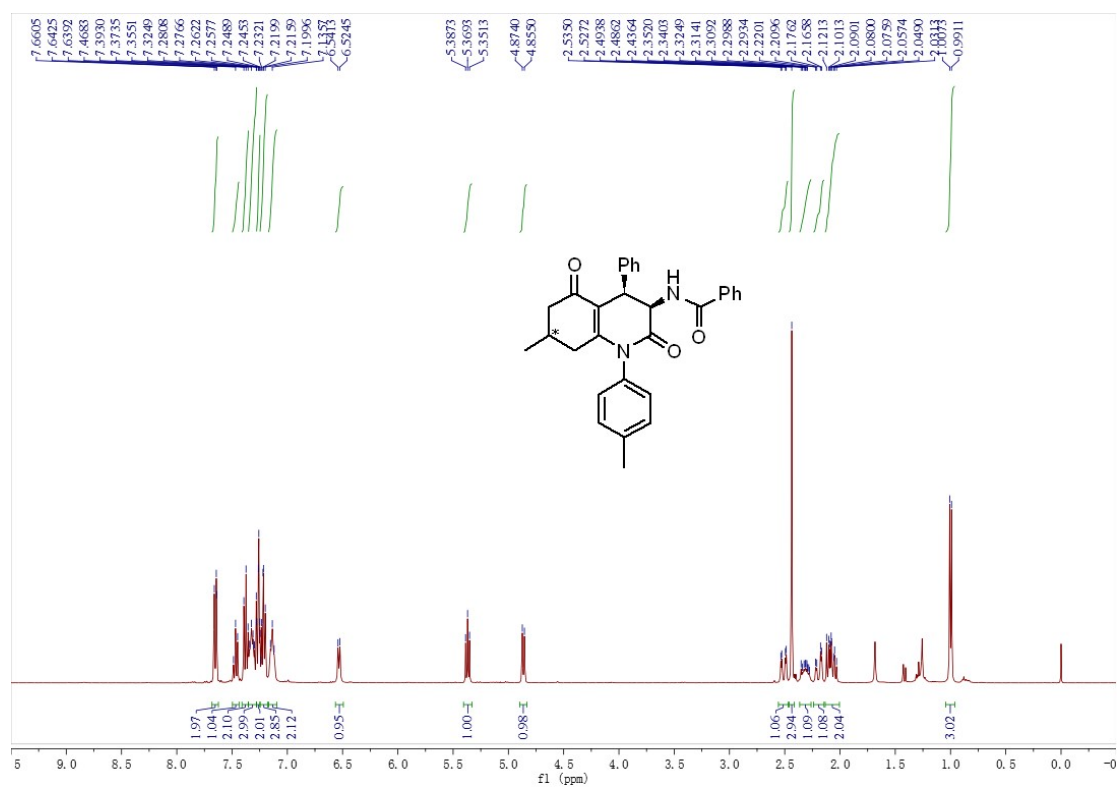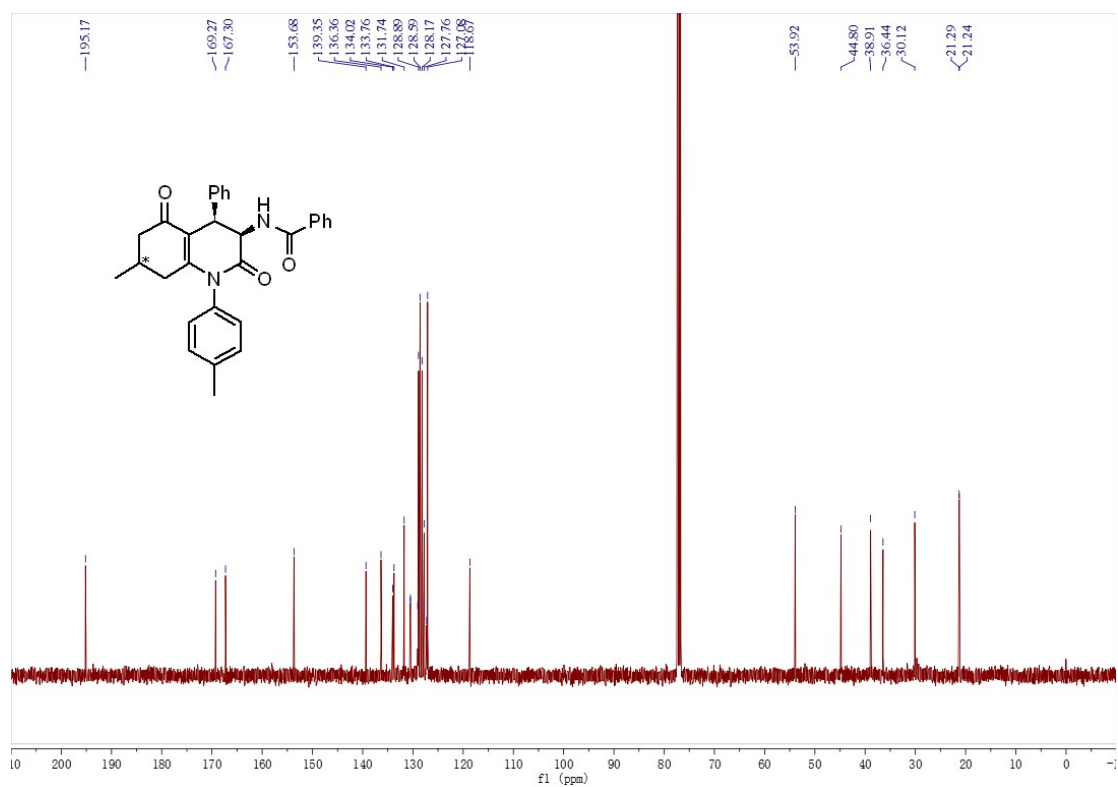

# <sup>1</sup>H and <sup>13</sup>C NMR spectra for 3y

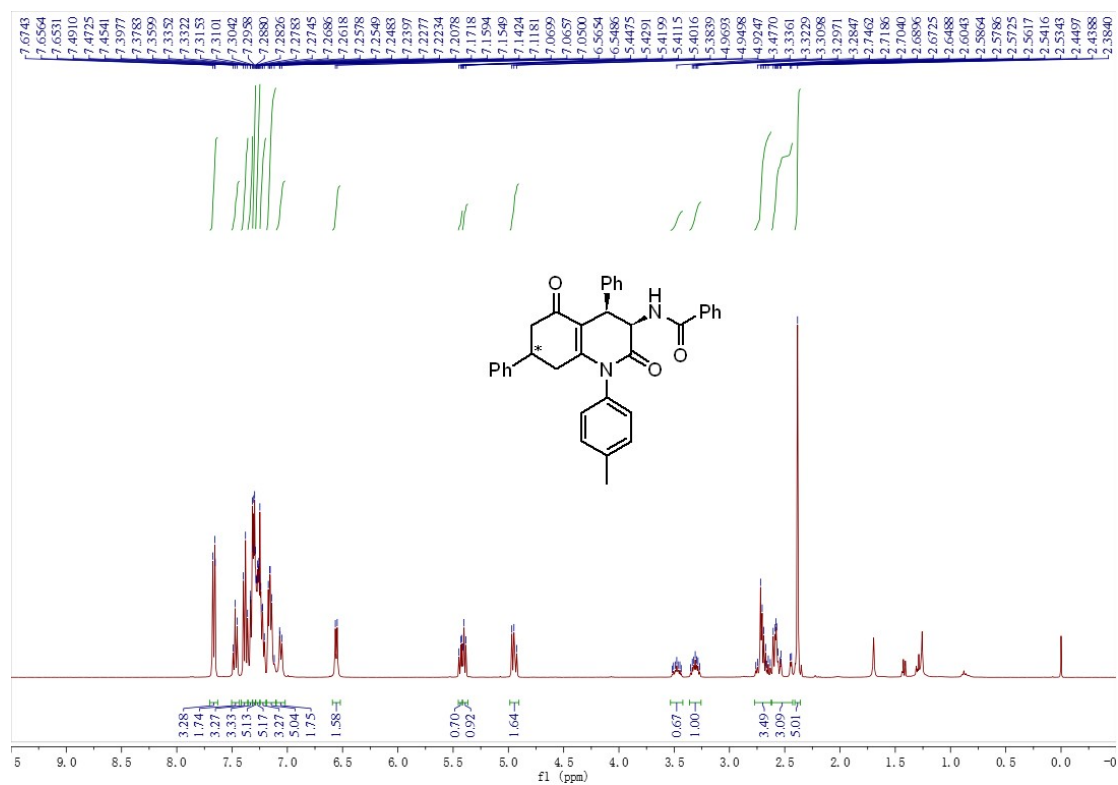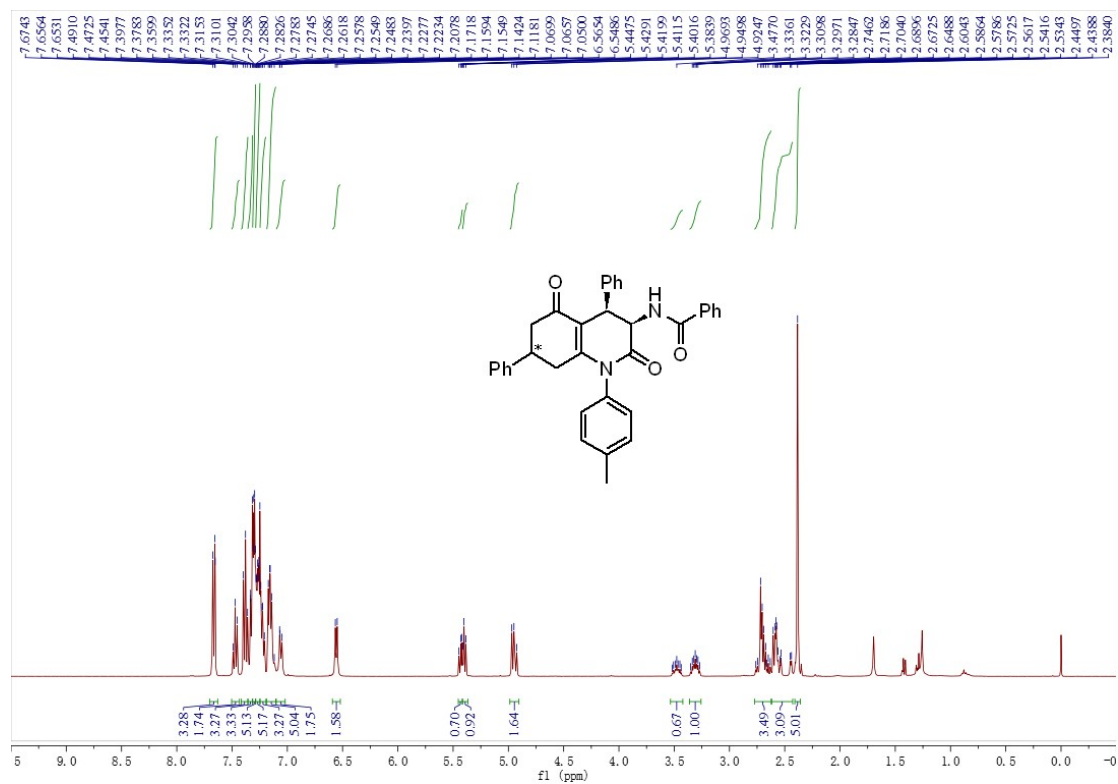

### <sup>1</sup>H and <sup>13</sup>C NMR spectra for 3z

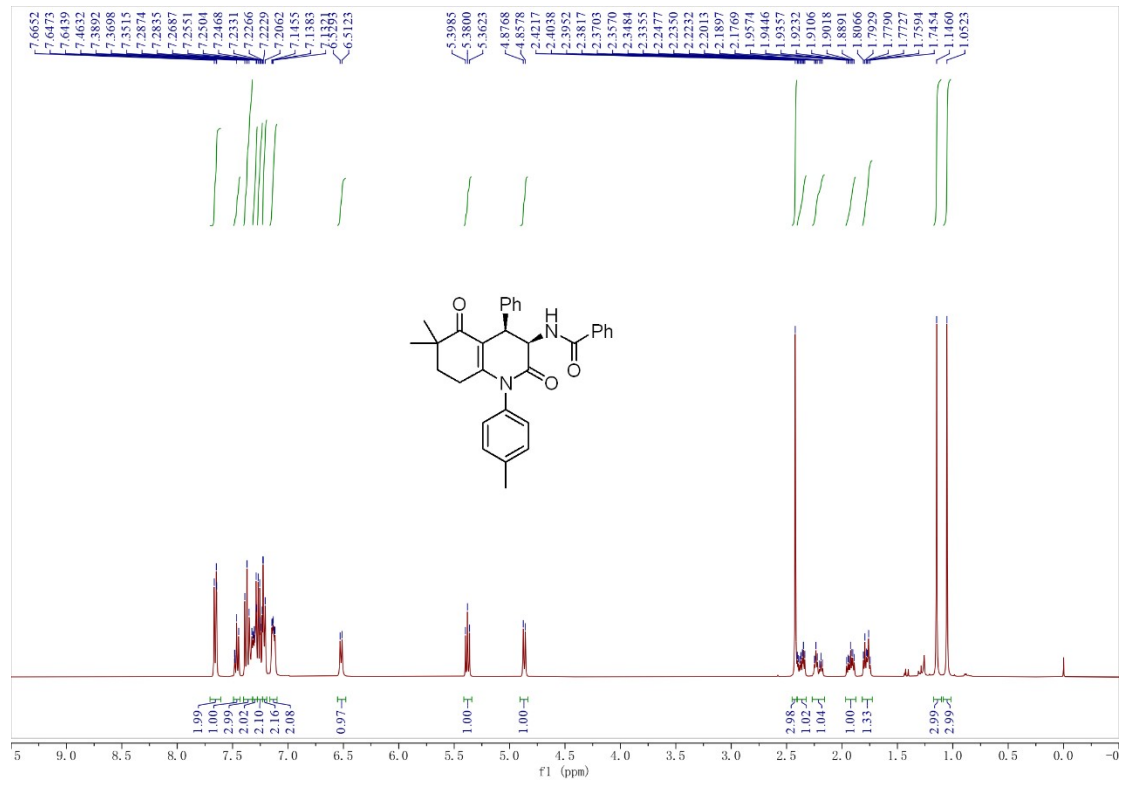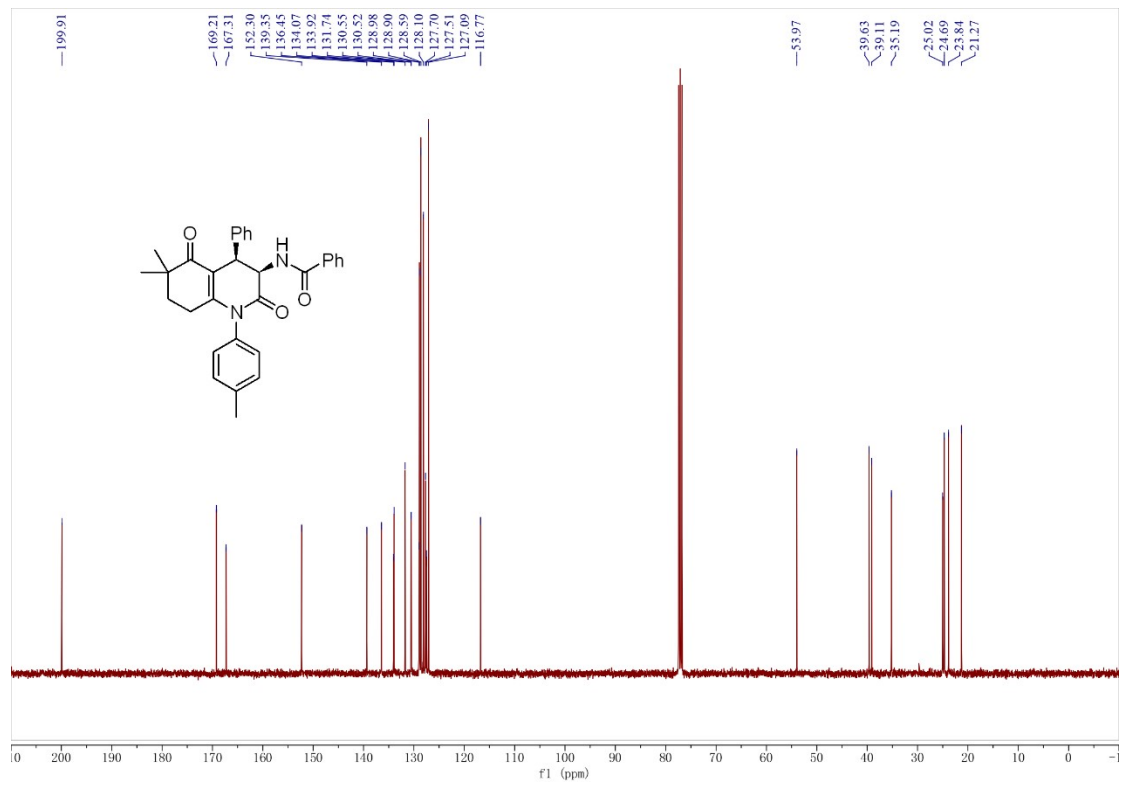

# <sup>1</sup>H and <sup>13</sup>C NMR spectra for 3a'

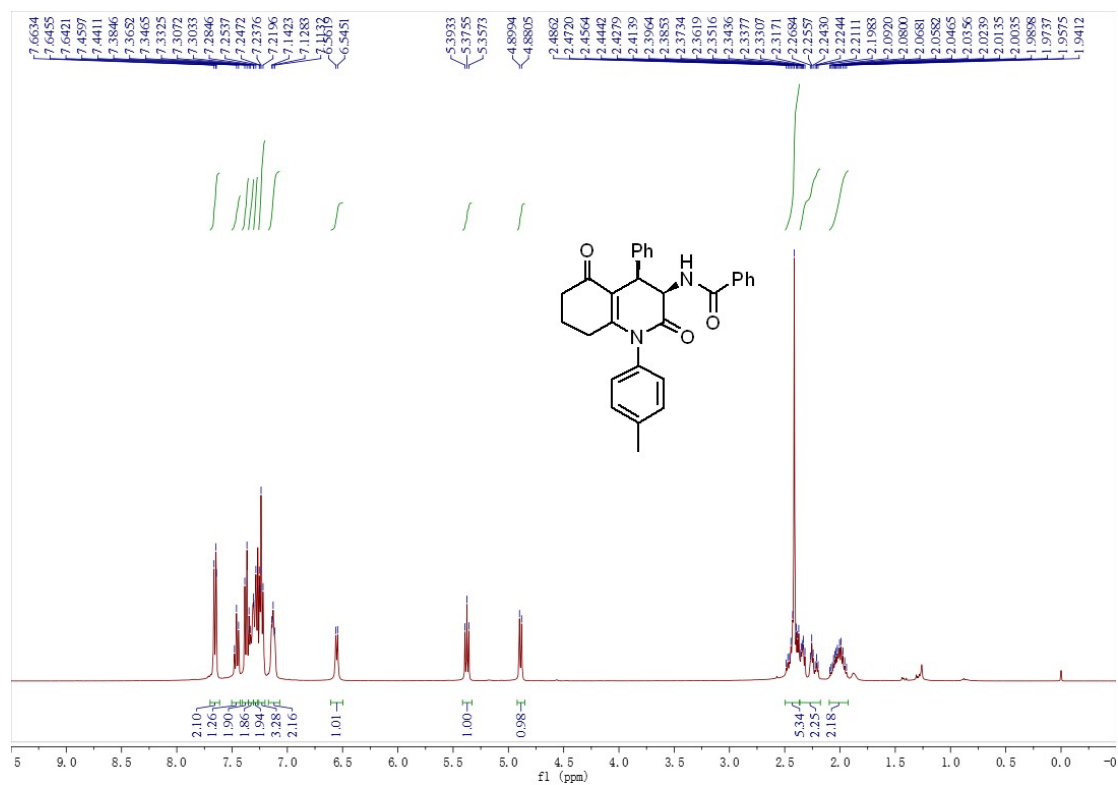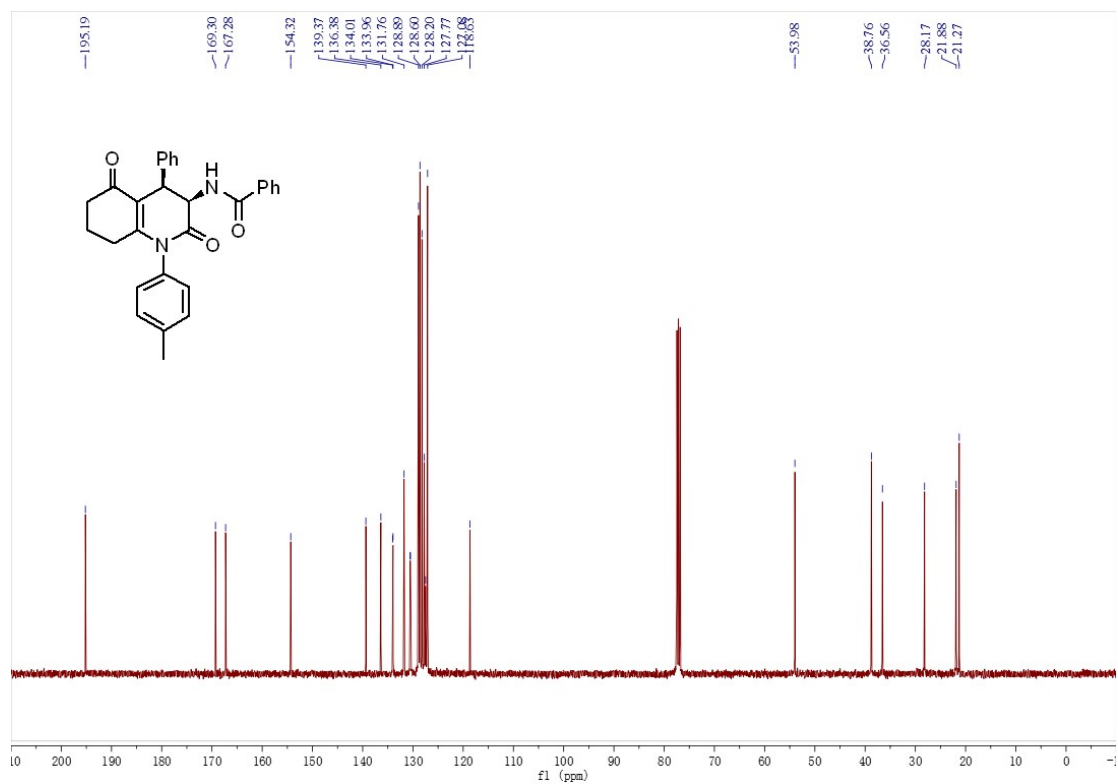

# <sup>1</sup>H and <sup>13</sup>C NMR spectra for 4b

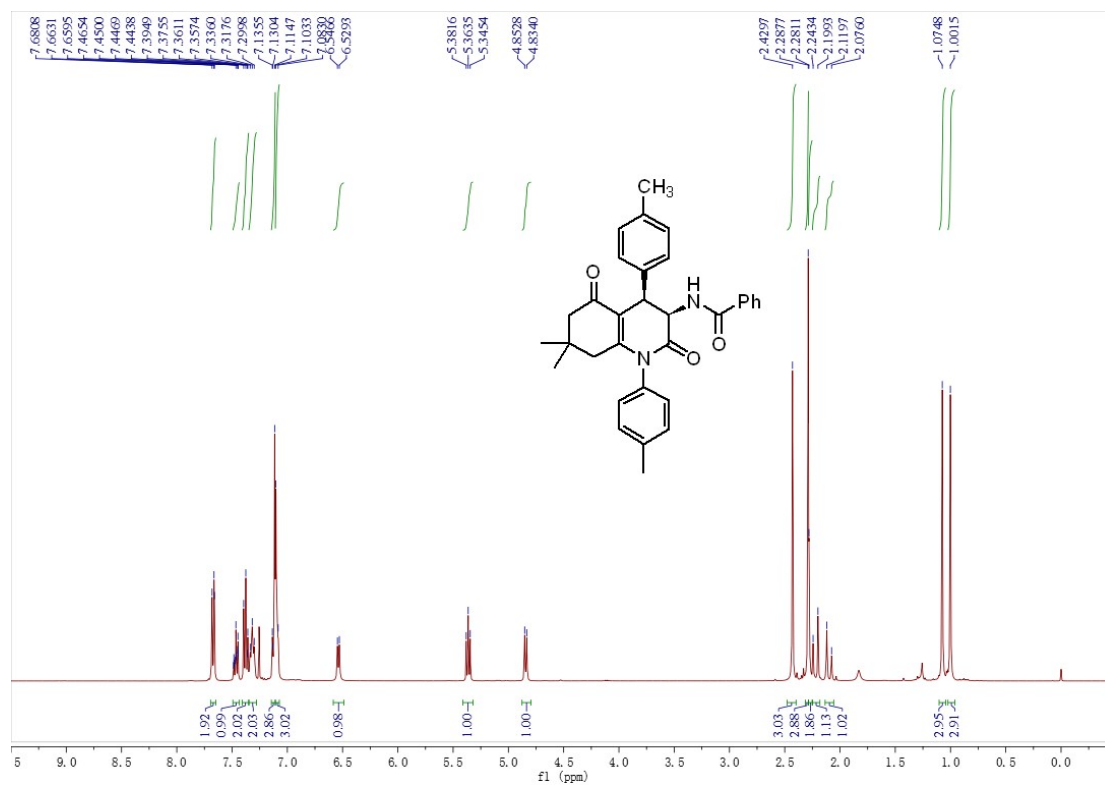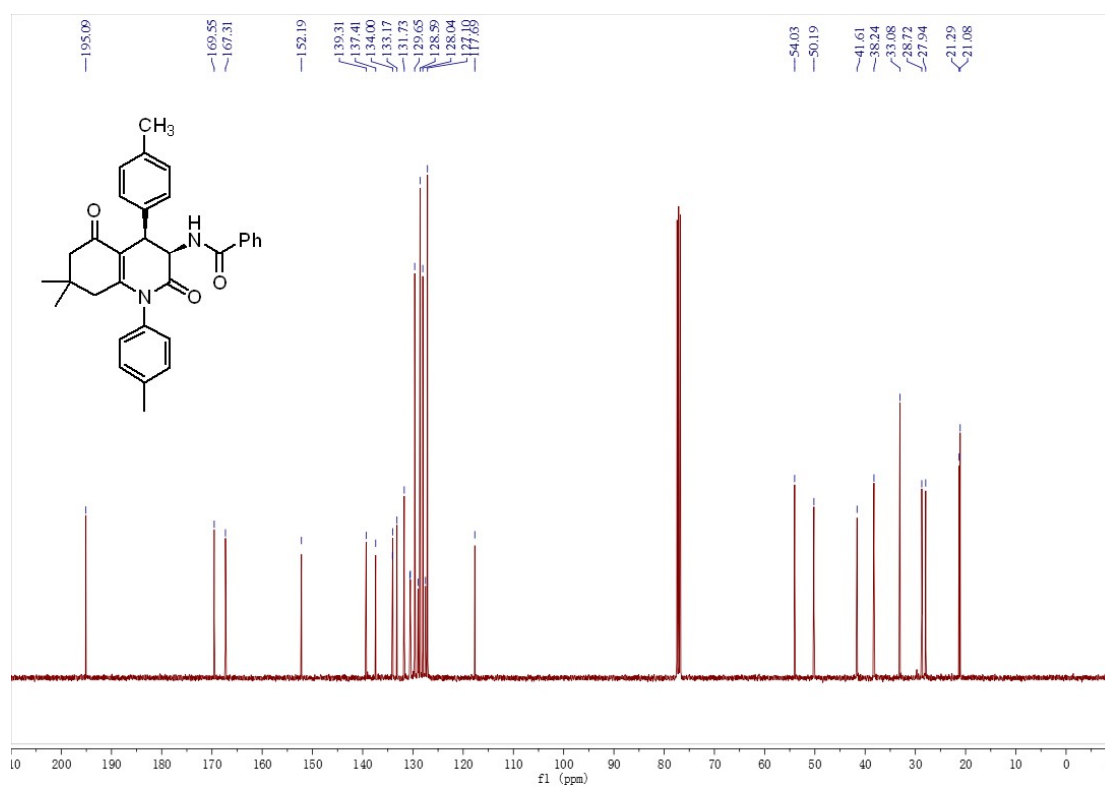

# <sup>1</sup>H, <sup>13</sup>C and <sup>19</sup>F NMR spectra for 4c

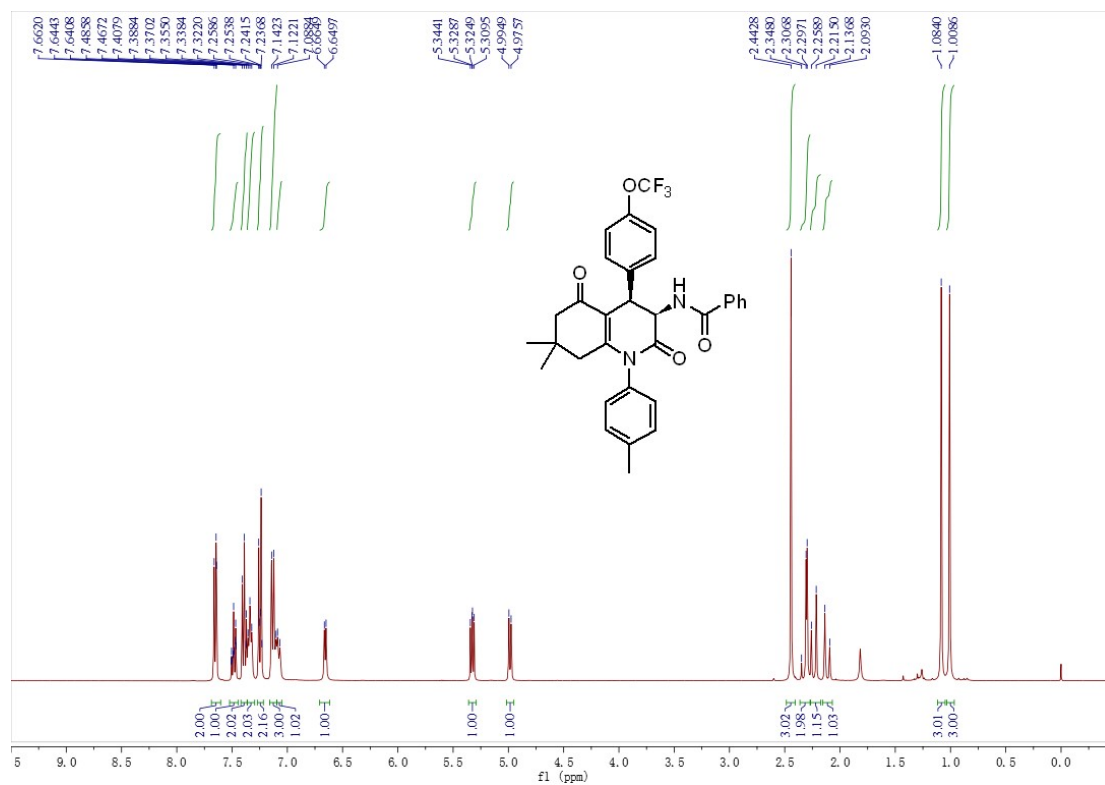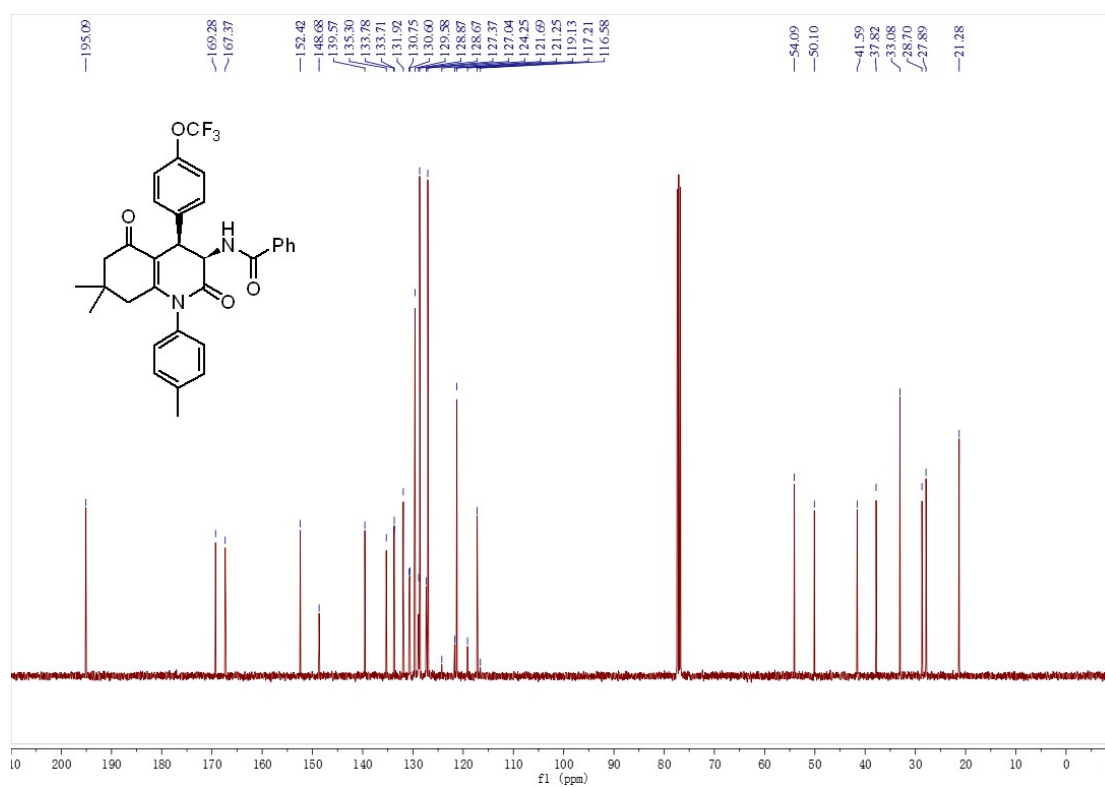

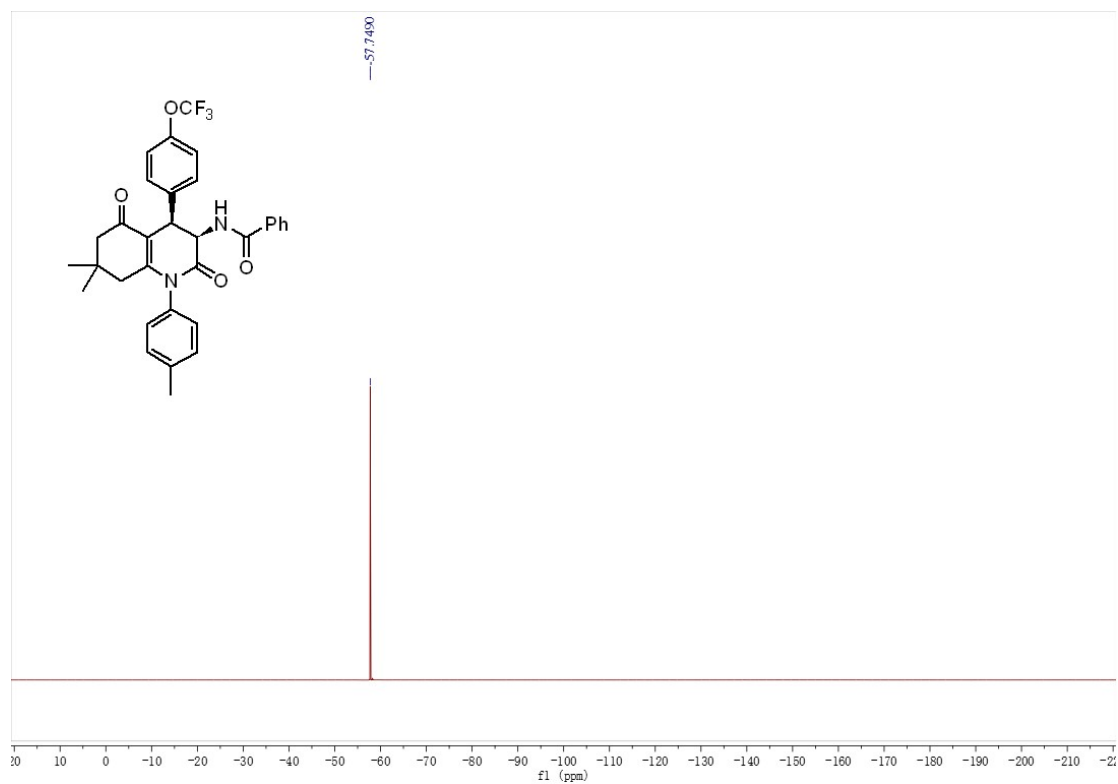

**$^1\text{H}$ ,  $^{13}\text{C}$  and  $^{19}\text{F}$  NMR spectra for 4d**

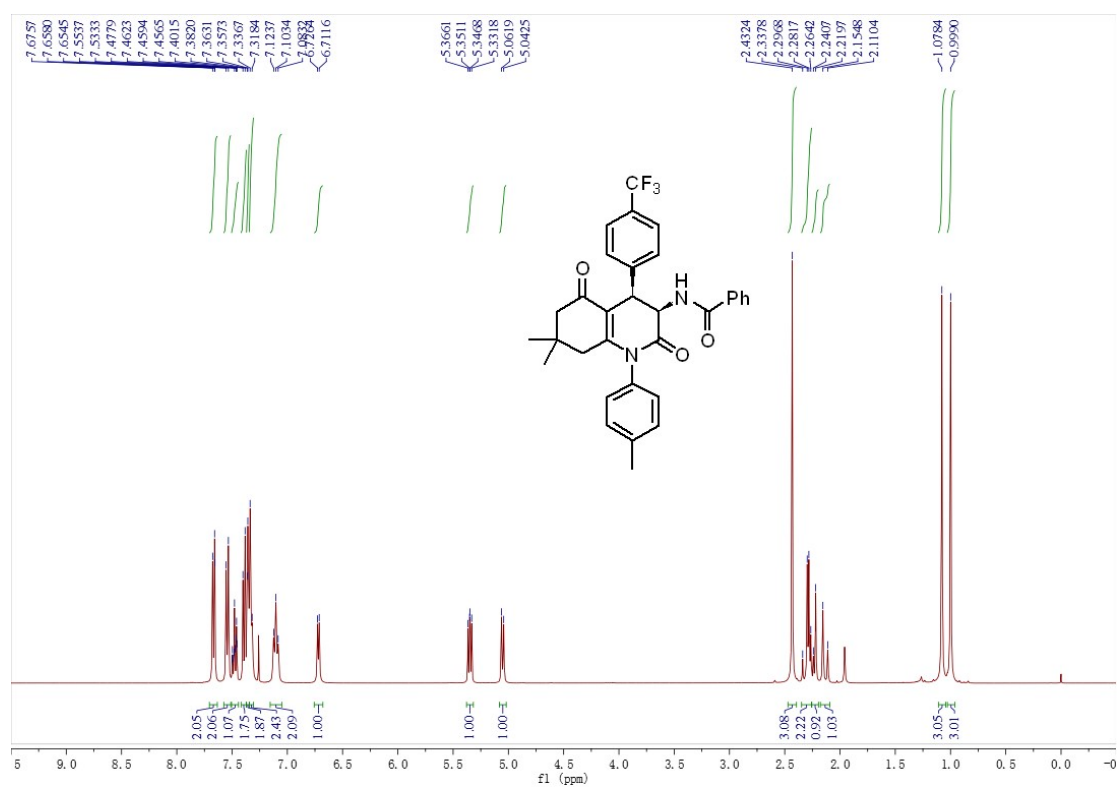



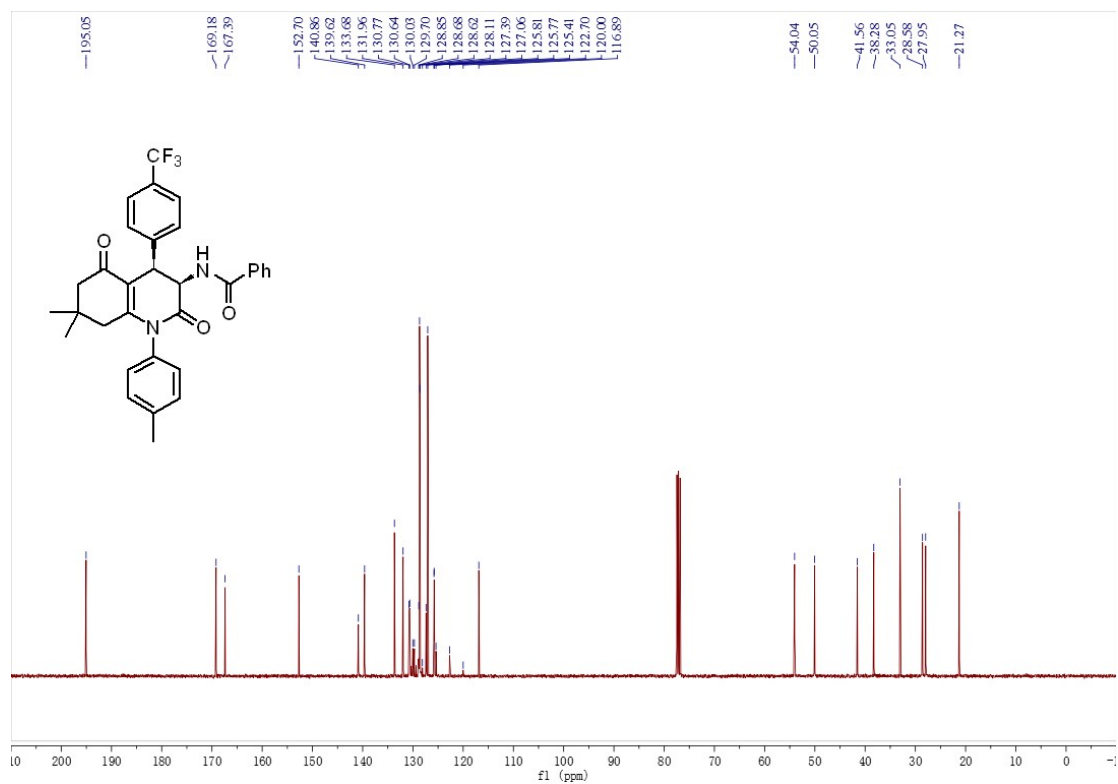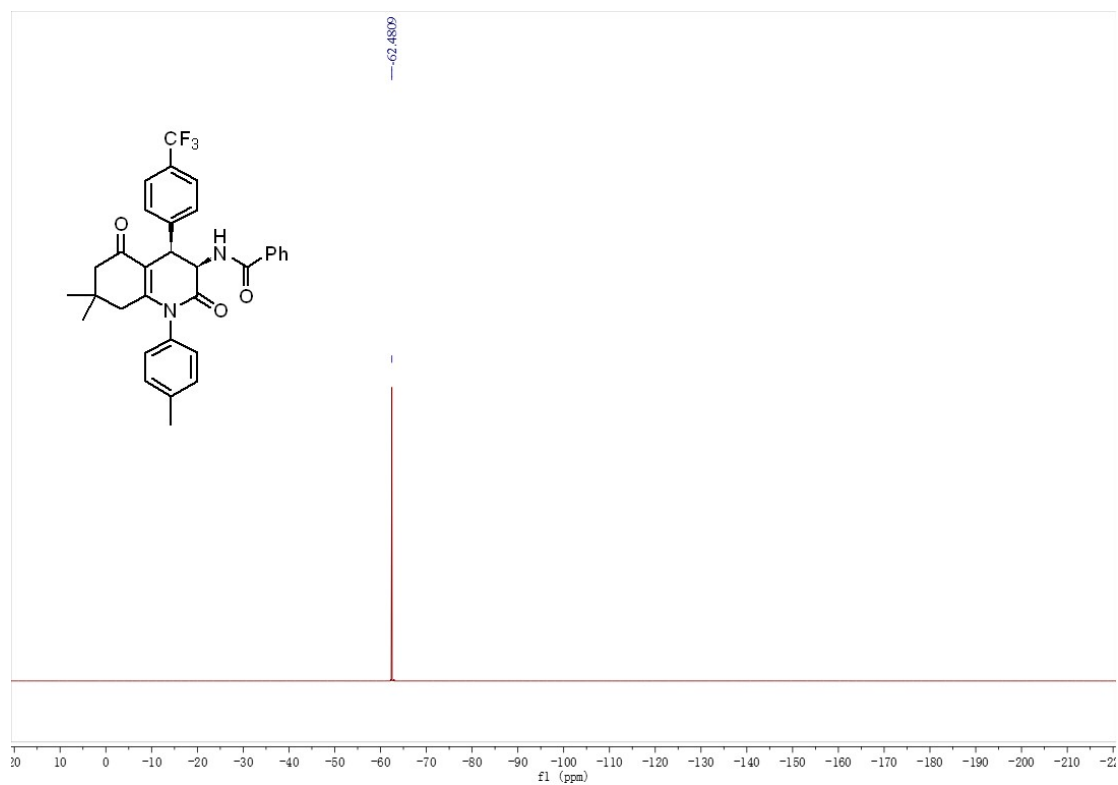

# <sup>1</sup>H, <sup>13</sup>C and <sup>19</sup>F NMR spectra for 4e

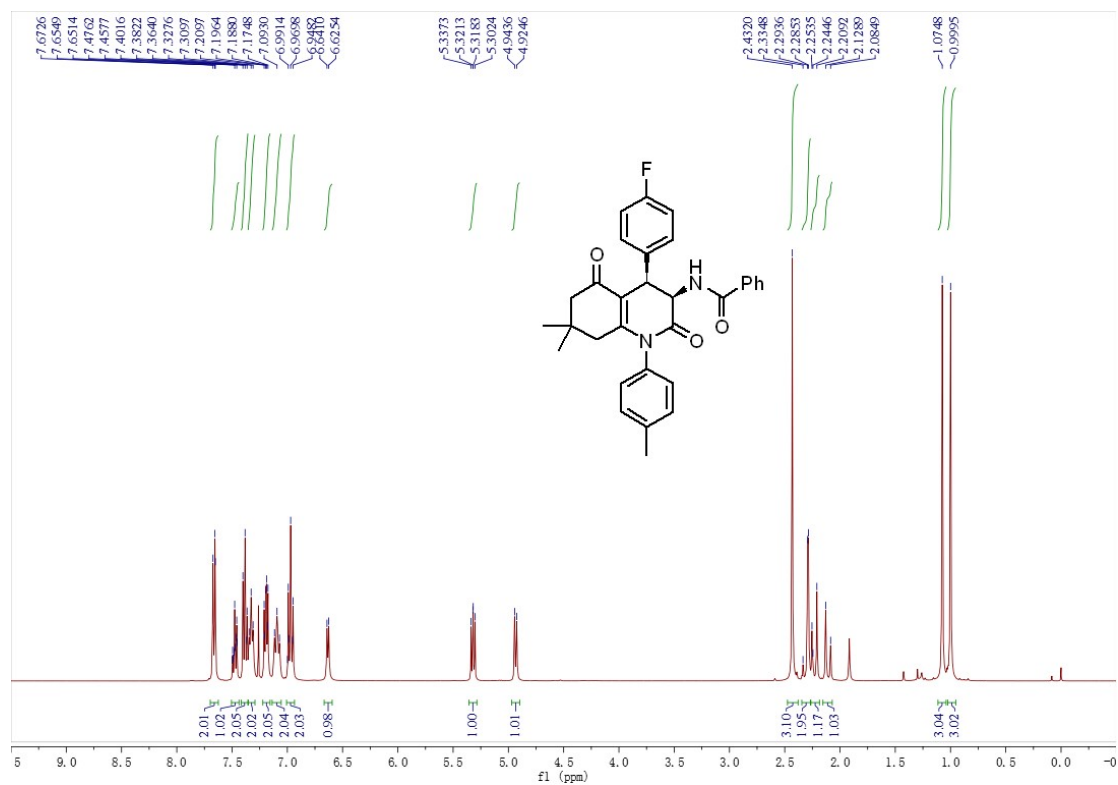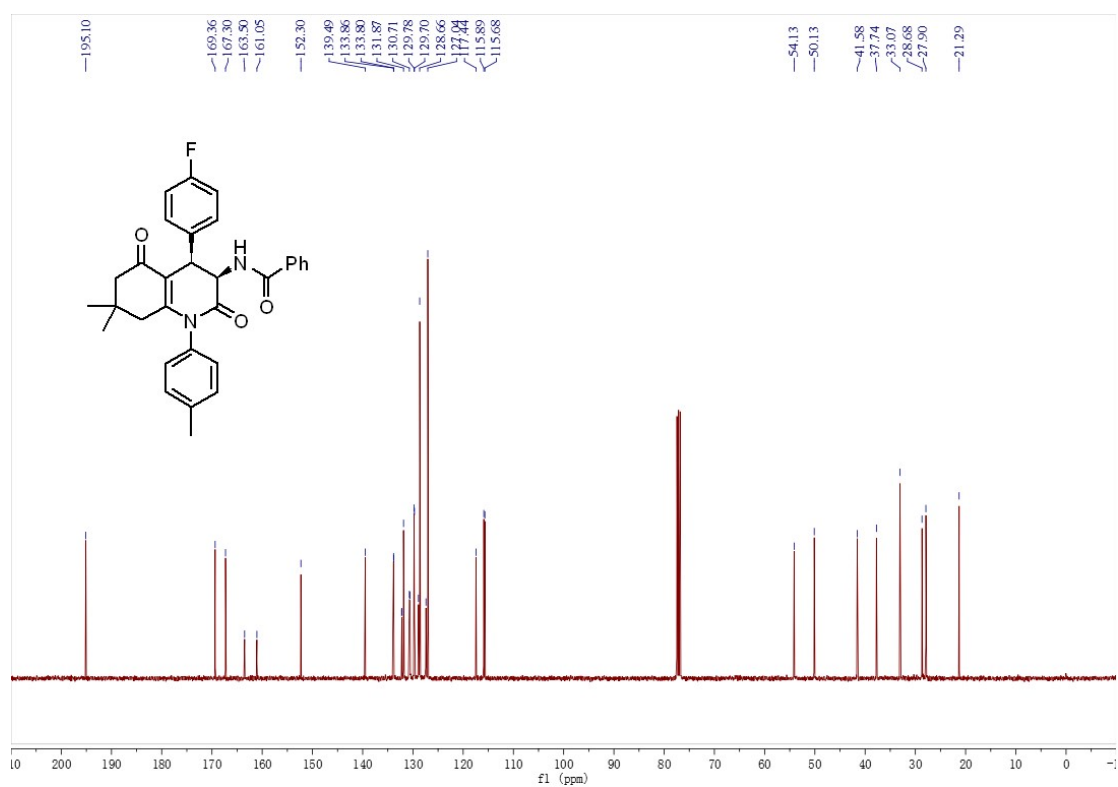

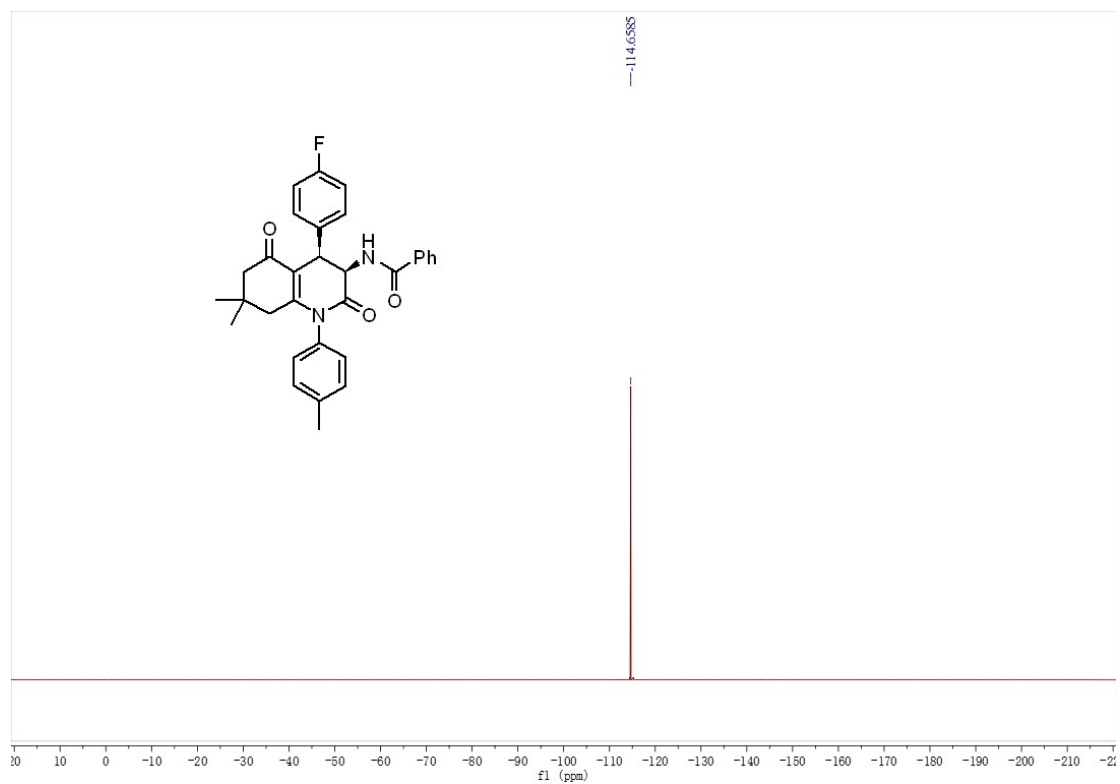

### $^1\text{H}$ and $^{13}\text{C}$ NMR spectra for 4f

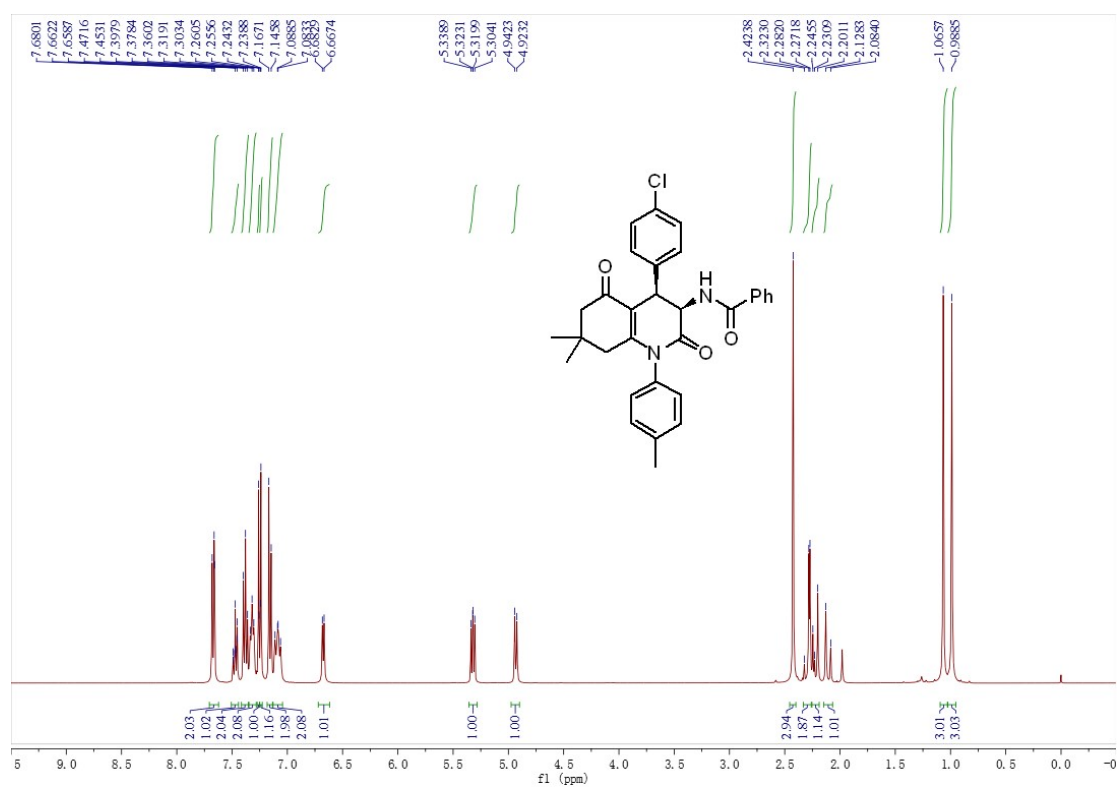

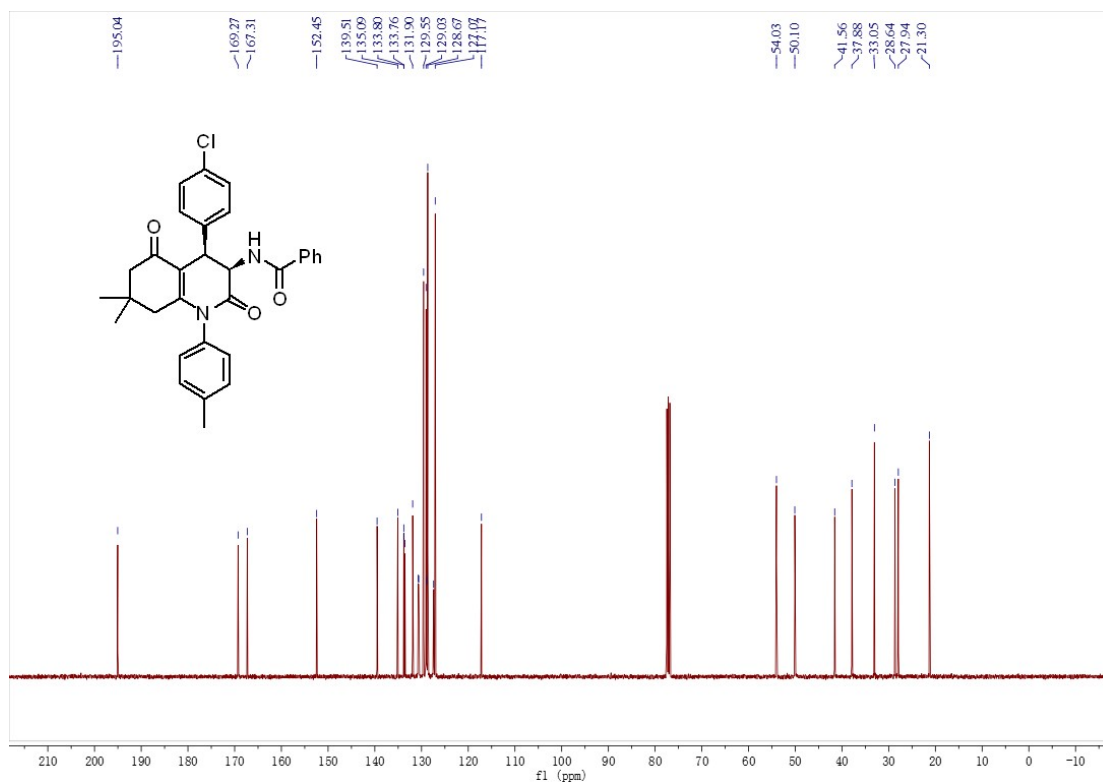

**<sup>1</sup>H and <sup>13</sup>C NMR spectra for 4g**

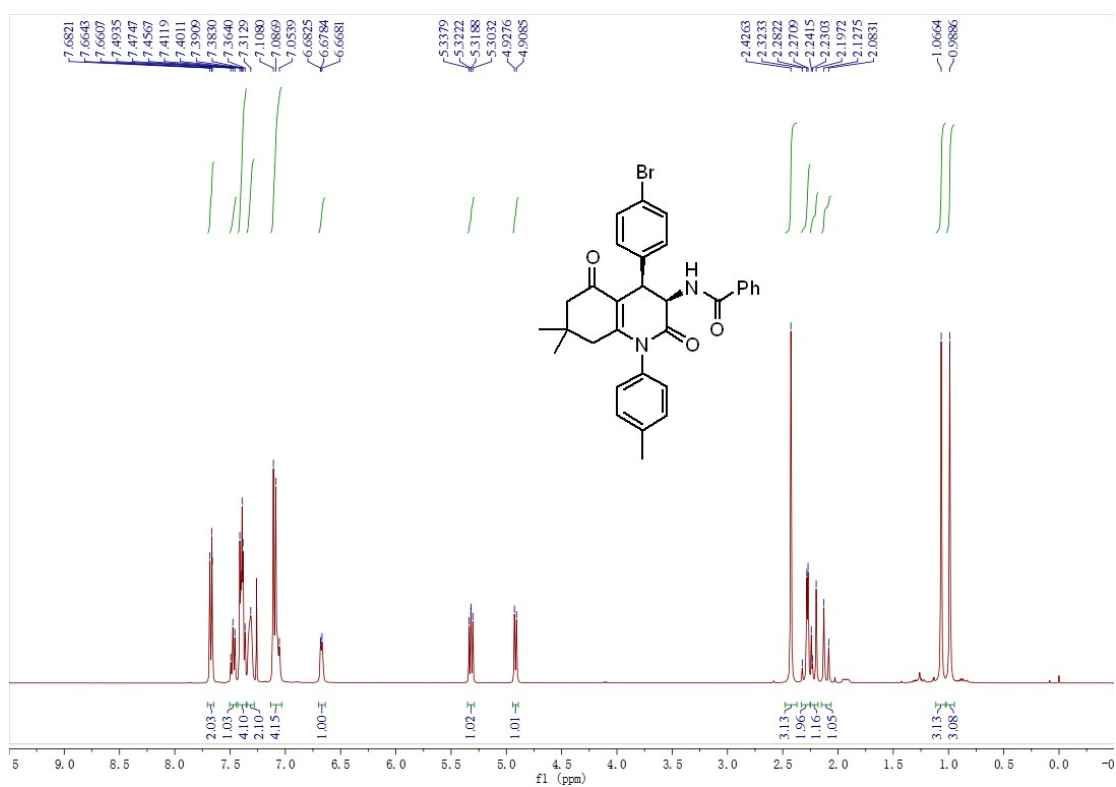

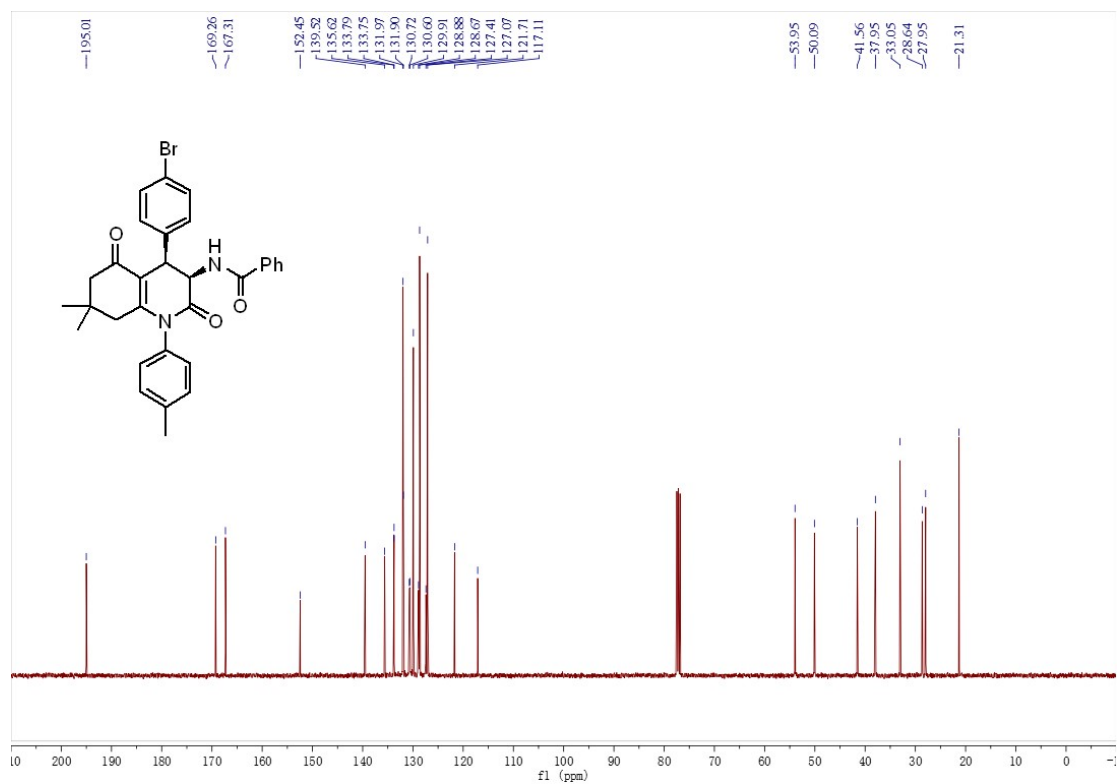

**<sup>1</sup>H and <sup>13</sup>C NMR spectra for 4h**

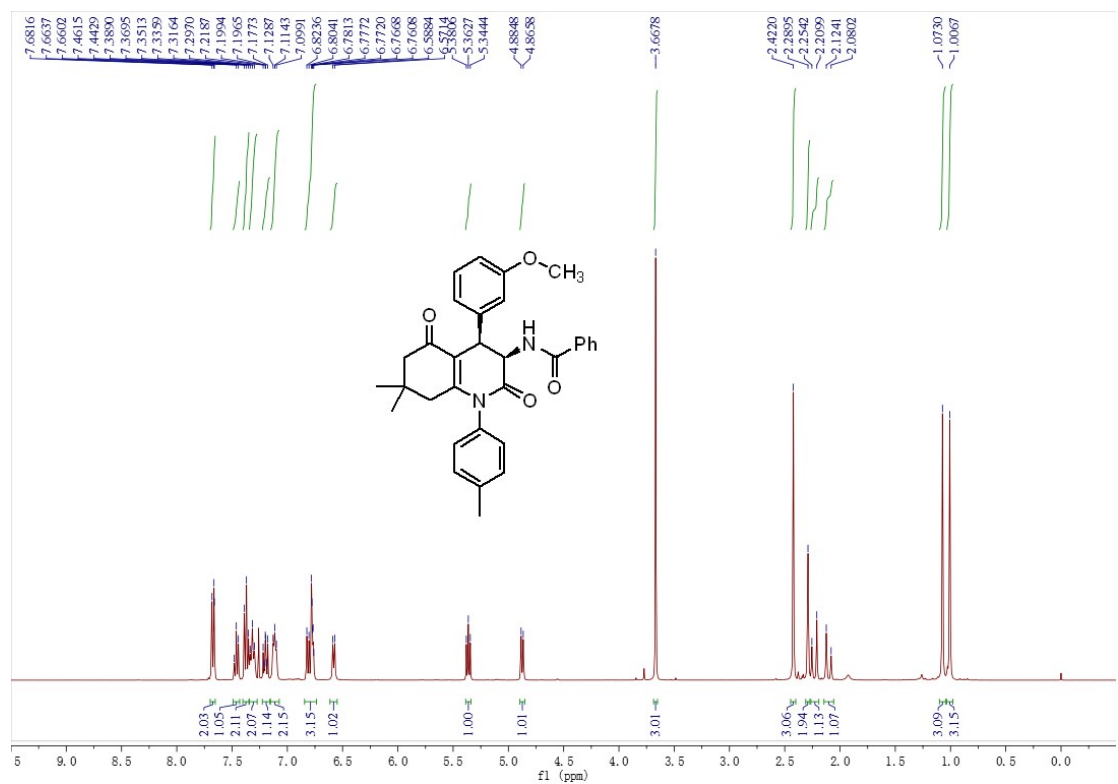

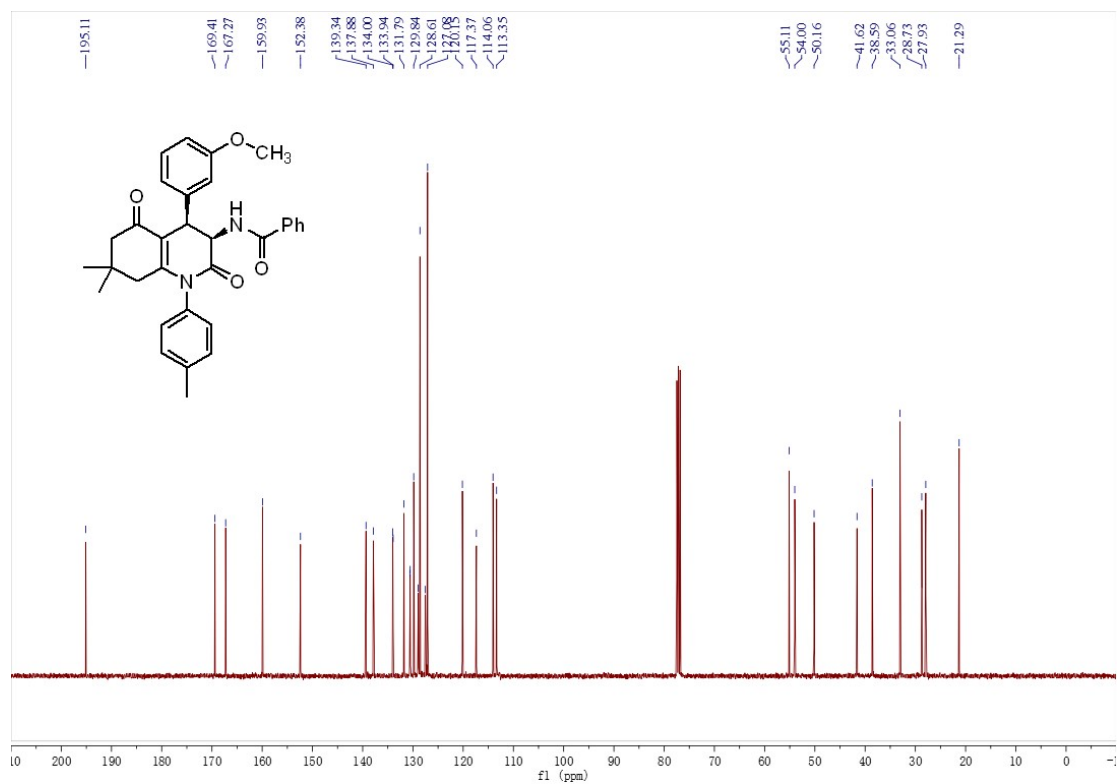

**<sup>1</sup>H and <sup>13</sup>C NMR spectra for 4i**

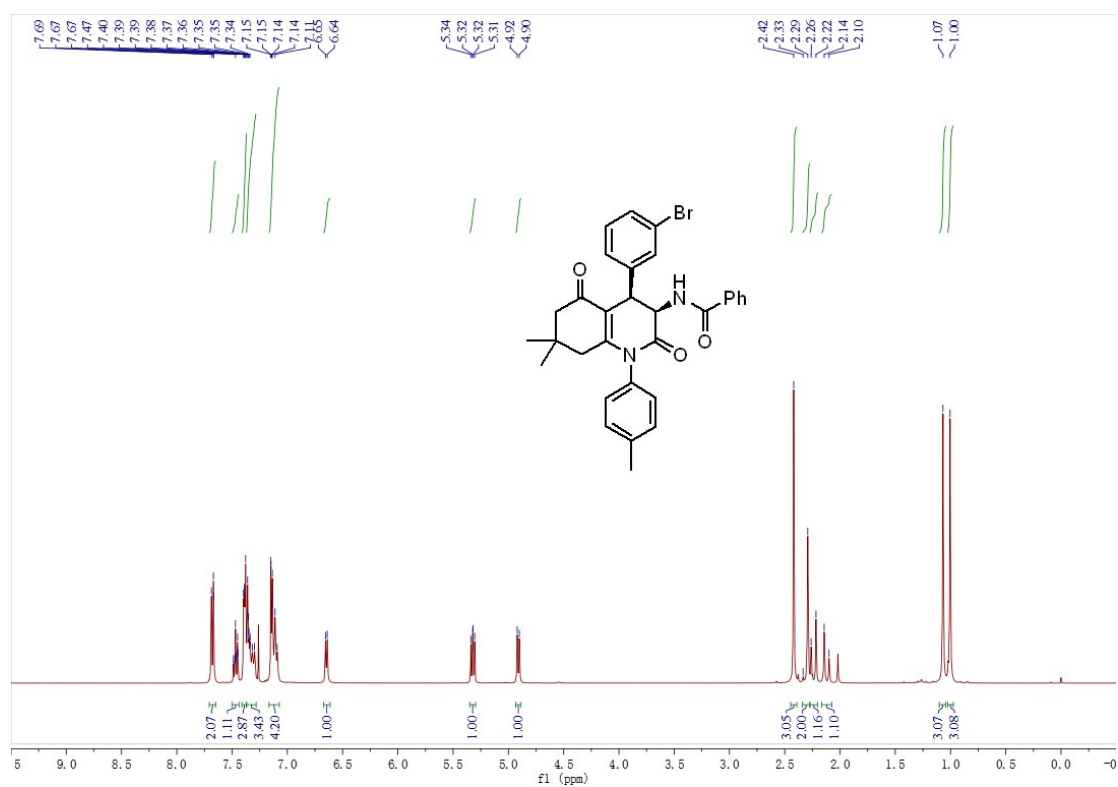

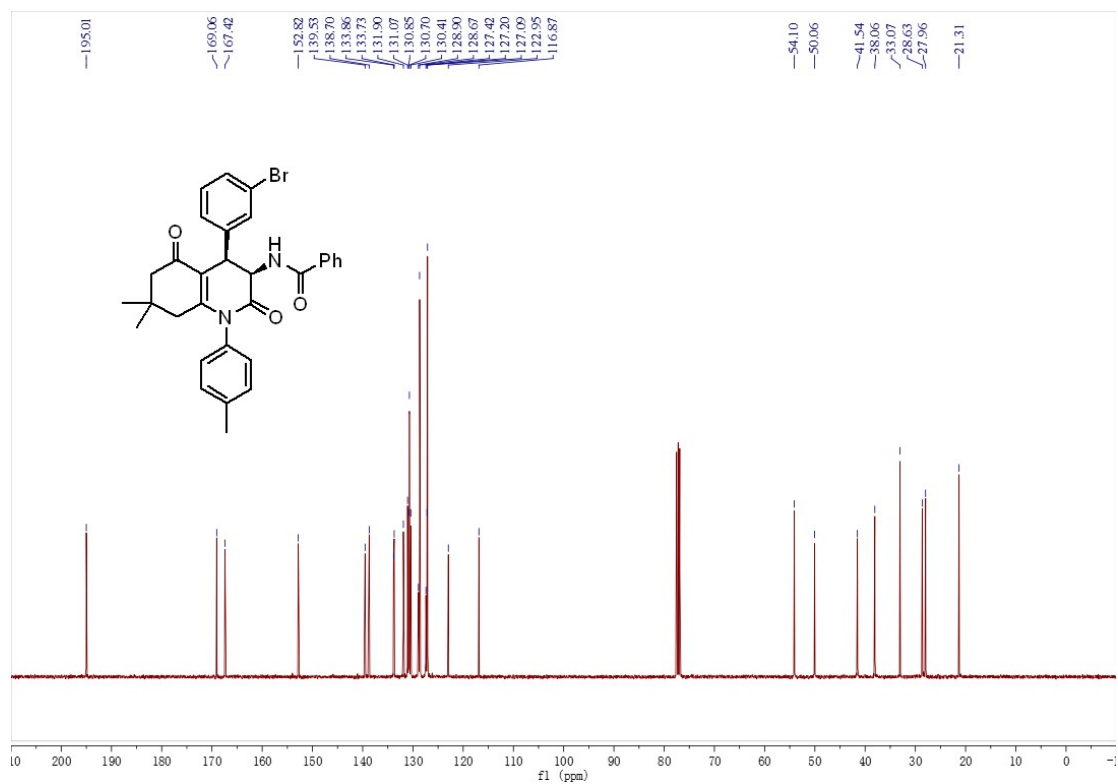

**<sup>1</sup>H and <sup>13</sup>C NMR spectra for 4j**

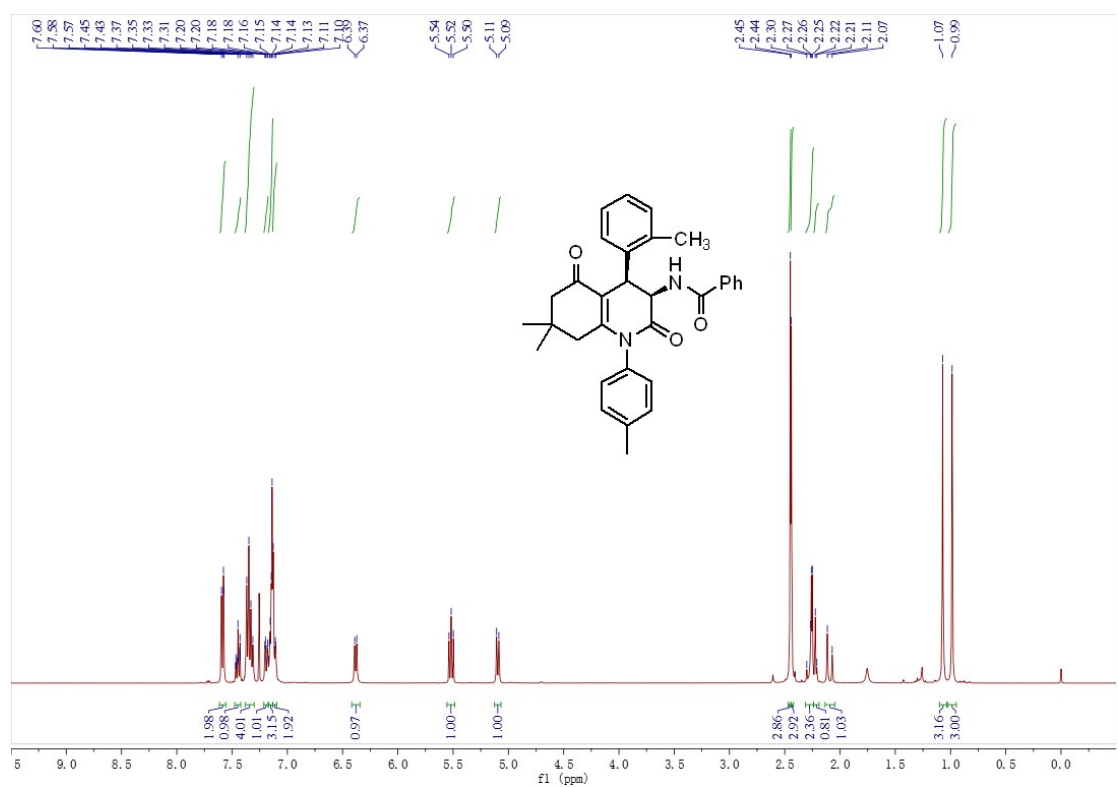

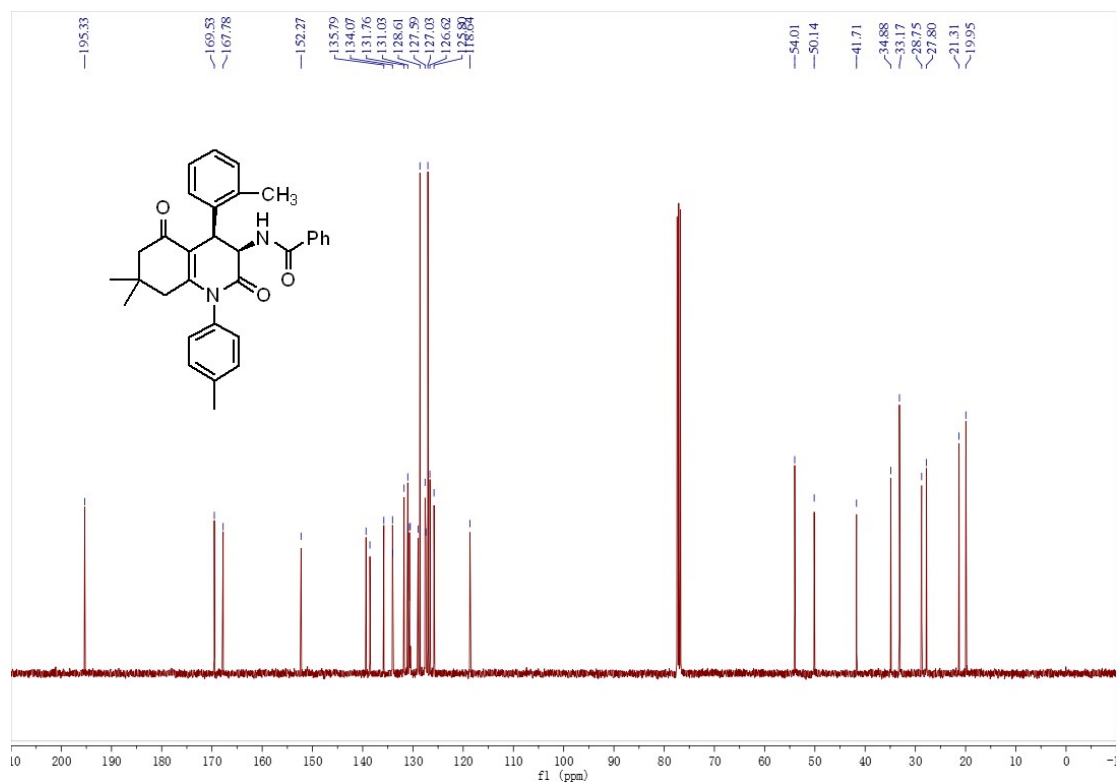

$^1\text{H}$  and  $^{13}\text{C}$  NMR spectra for 4k

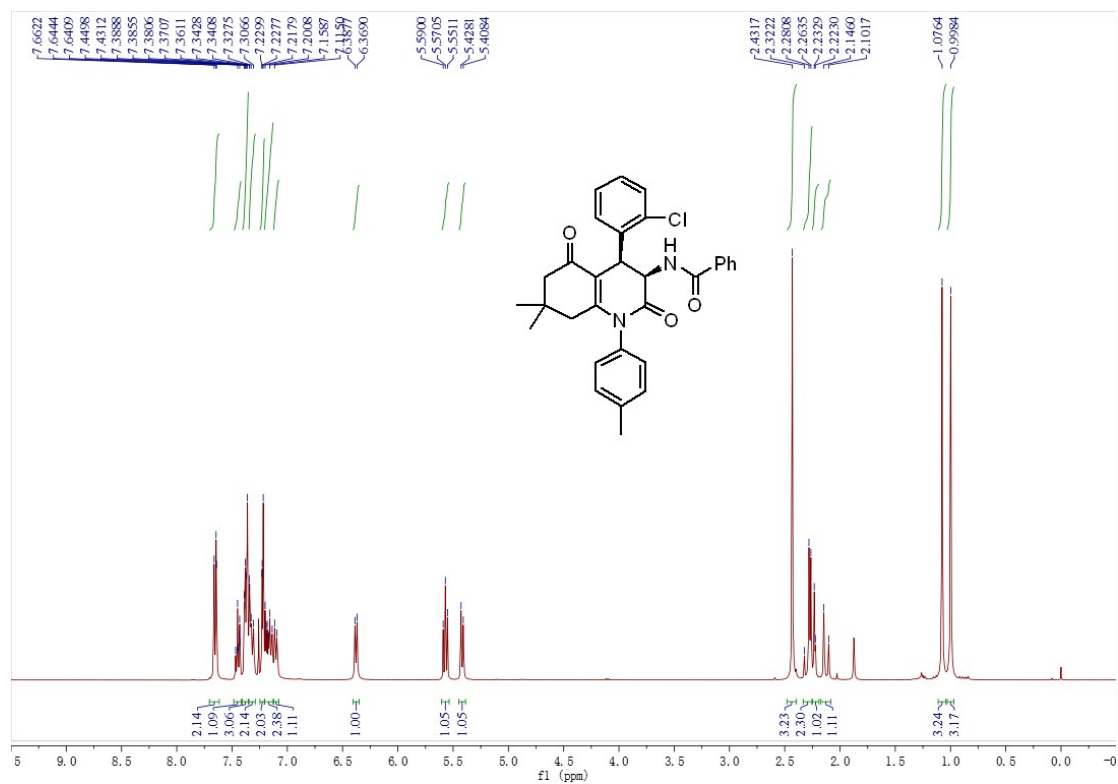



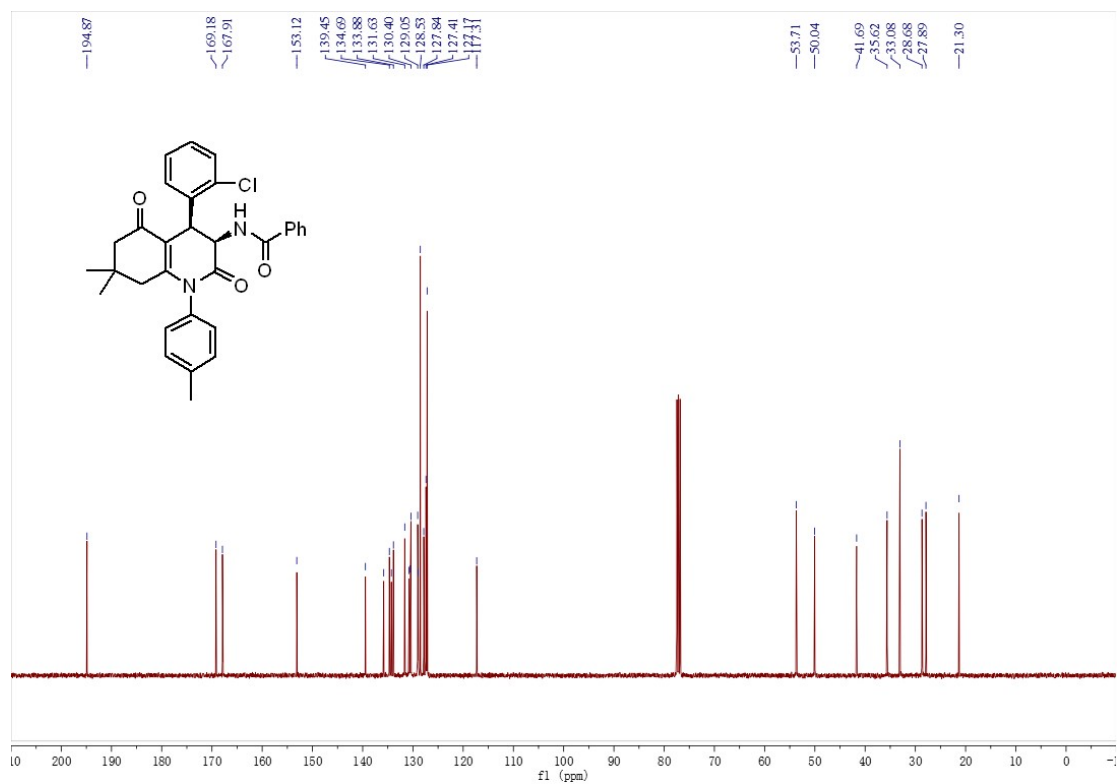

**<sup>1</sup>H and <sup>13</sup>C NMR spectra for 4l**

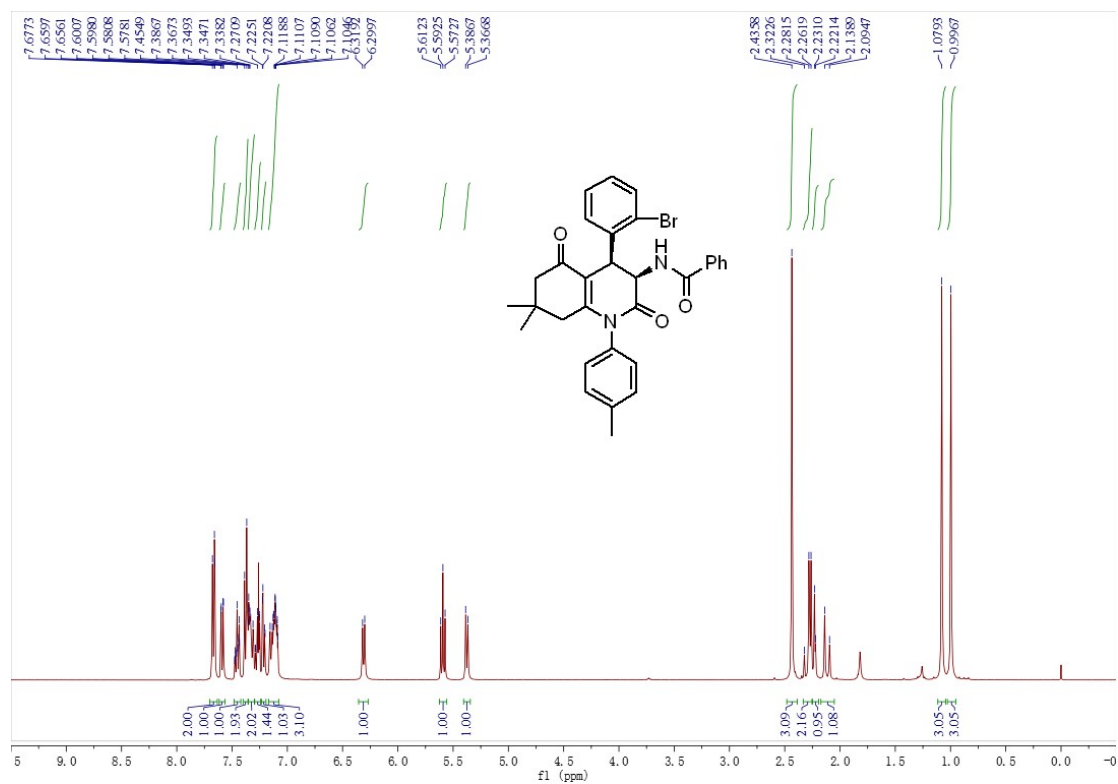

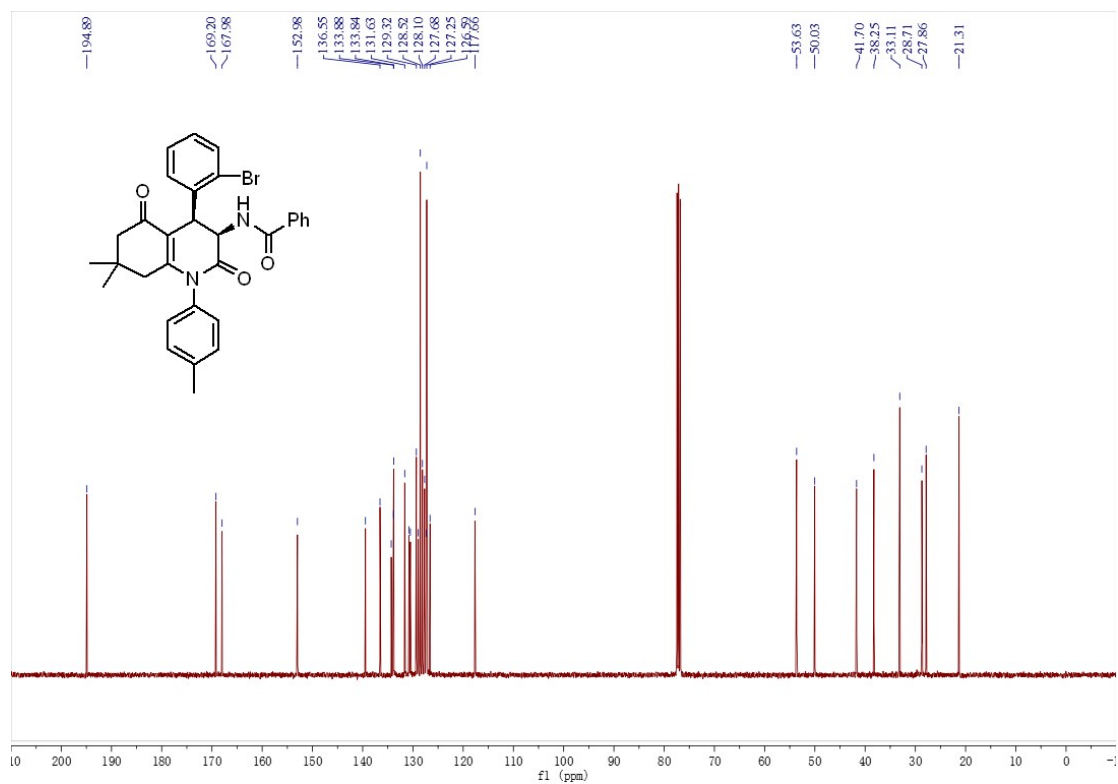

**<sup>1</sup>H, <sup>13</sup>C and <sup>19</sup>F NMR spectra for 4m**

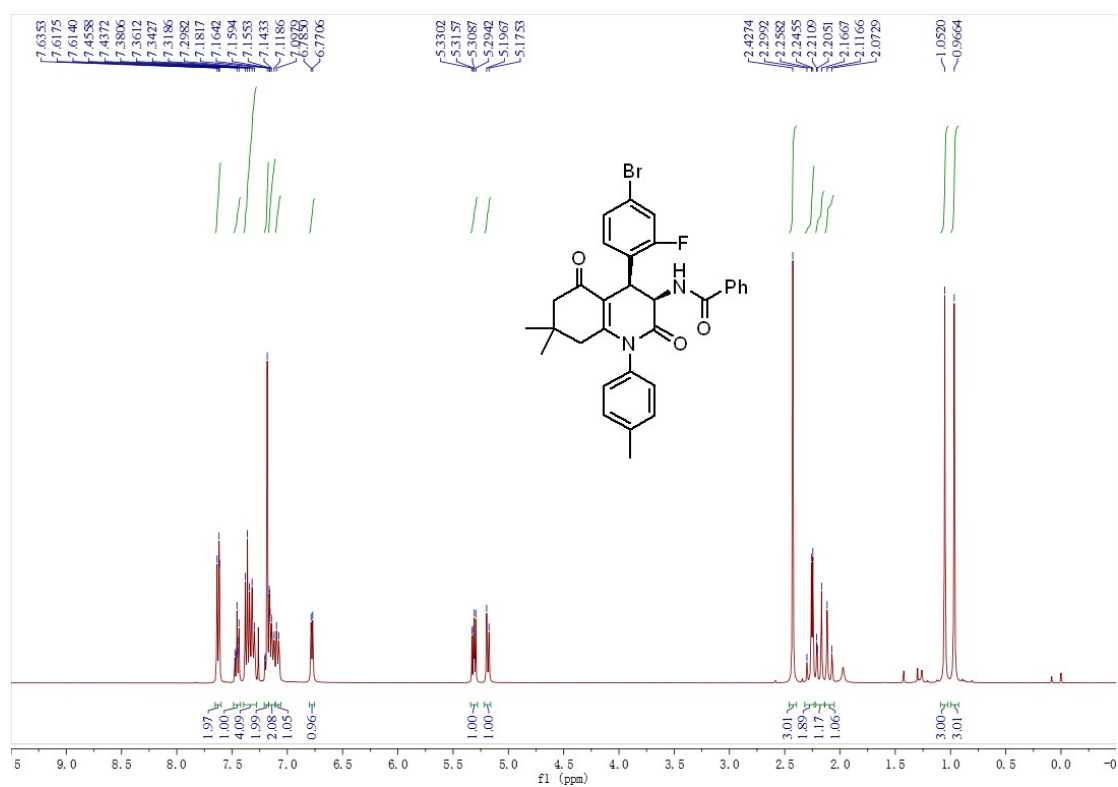

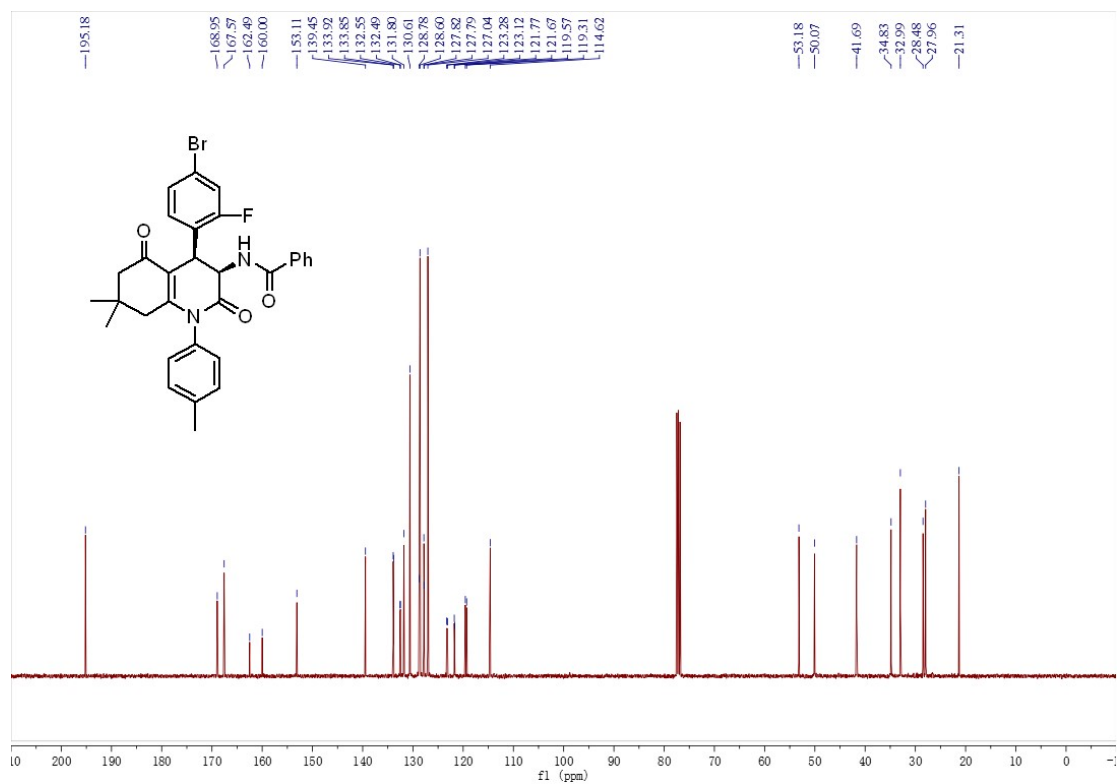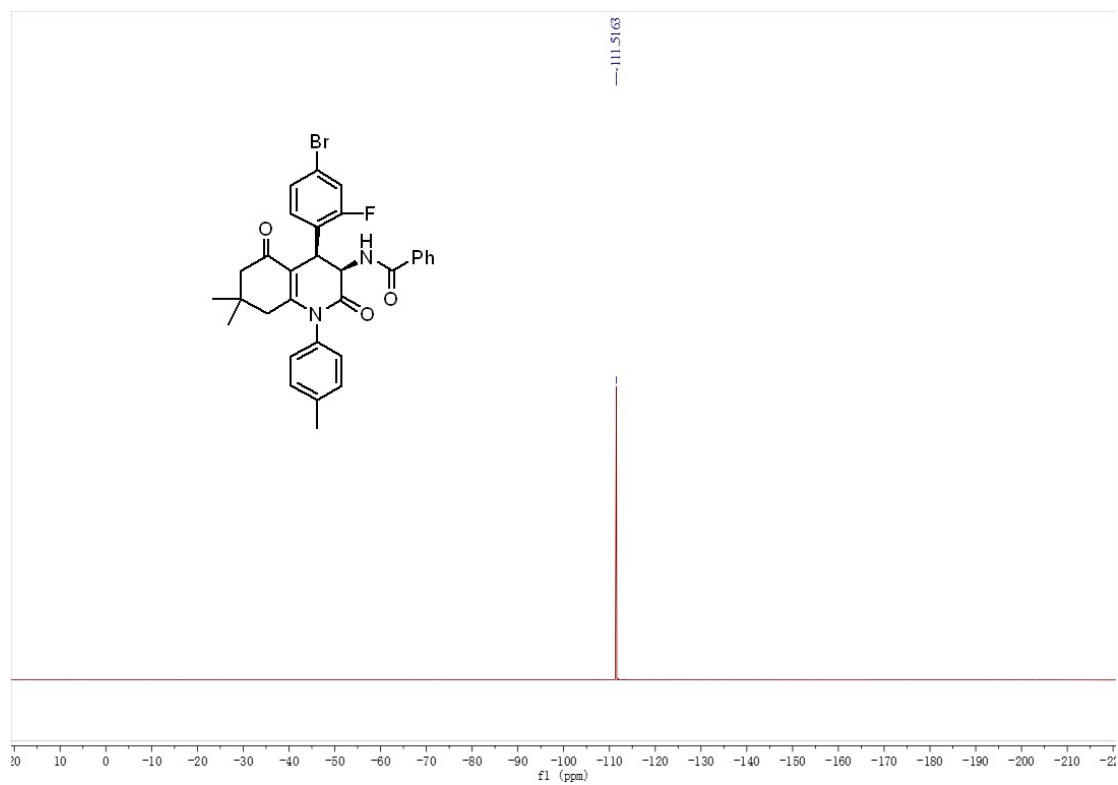

### <sup>1</sup>H, <sup>13</sup>C and <sup>19</sup>F NMR spectra for 4n

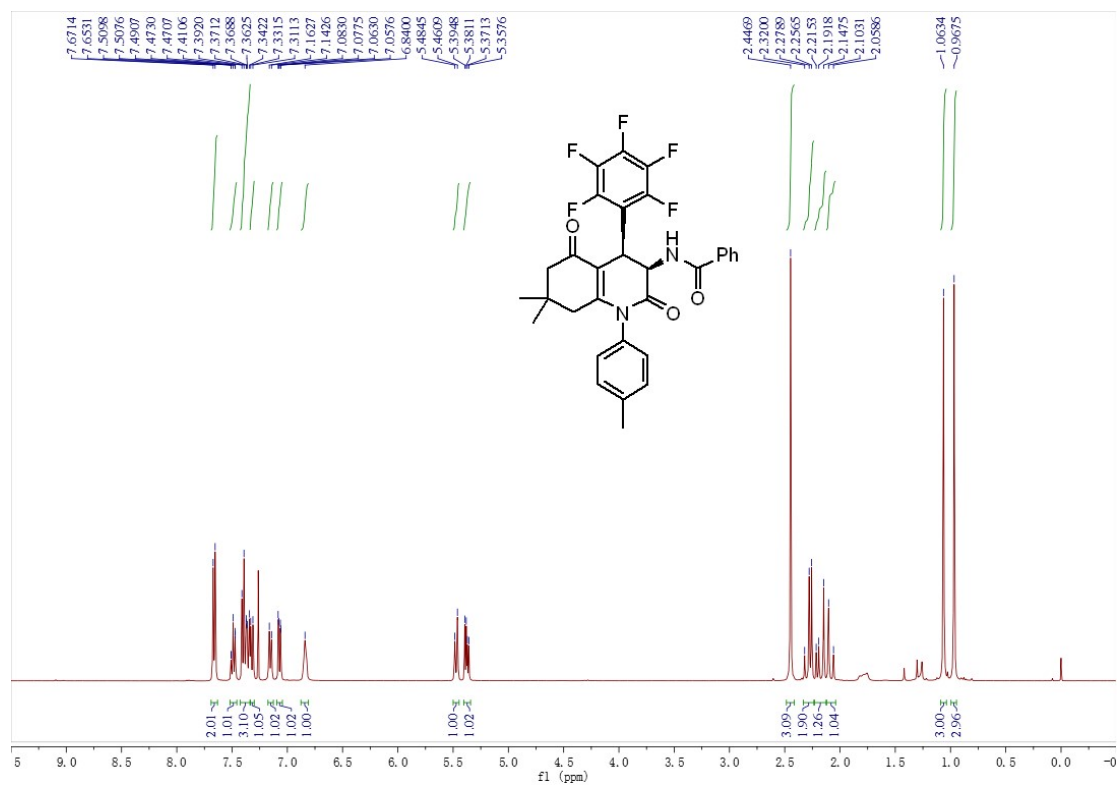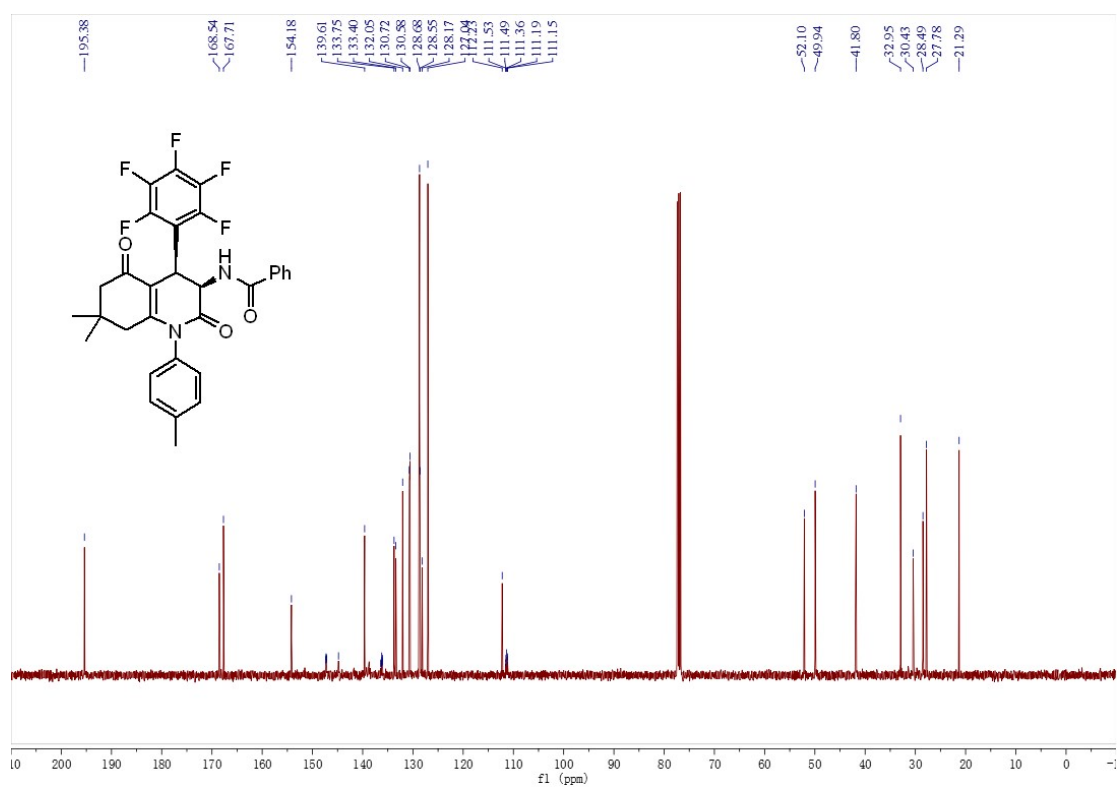

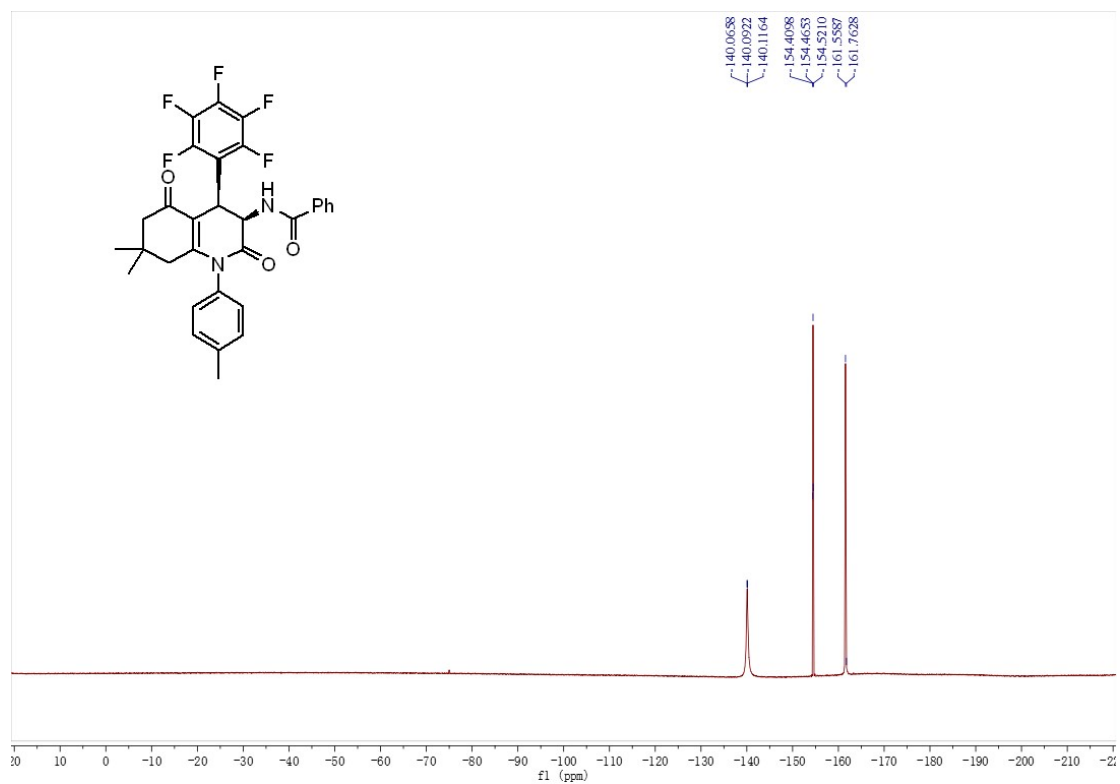

**<sup>1</sup>H and <sup>13</sup>C NMR spectra for 4o**

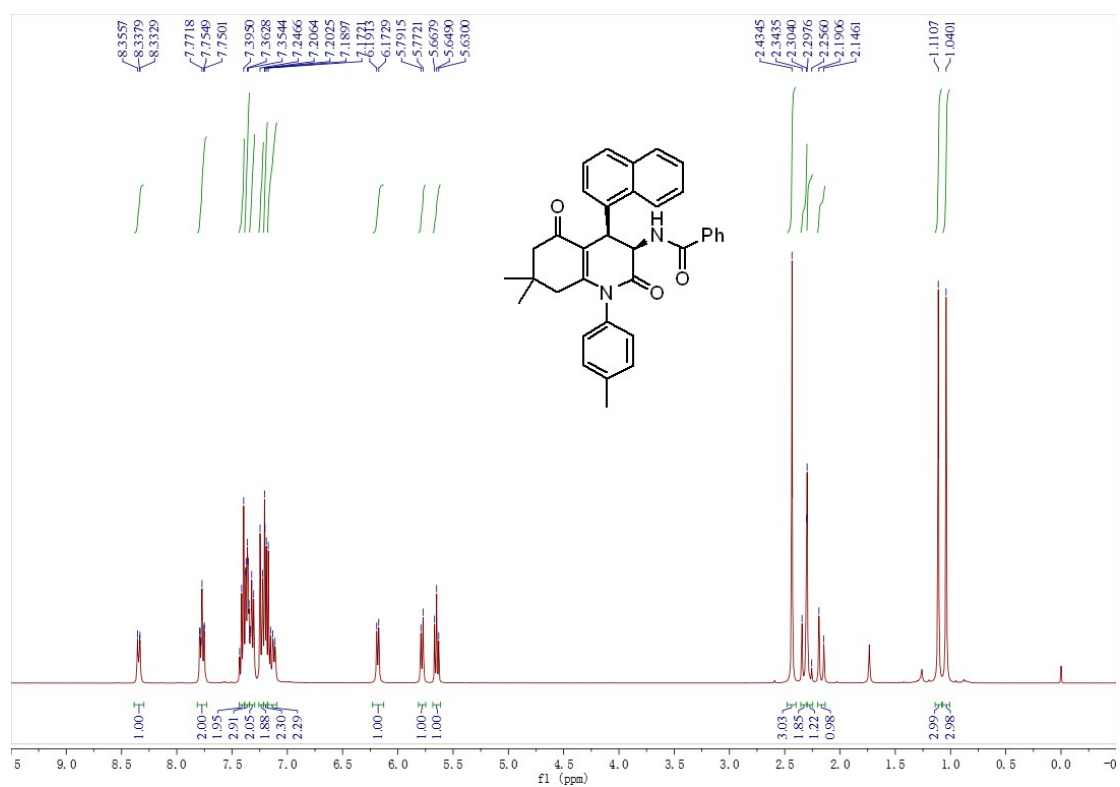

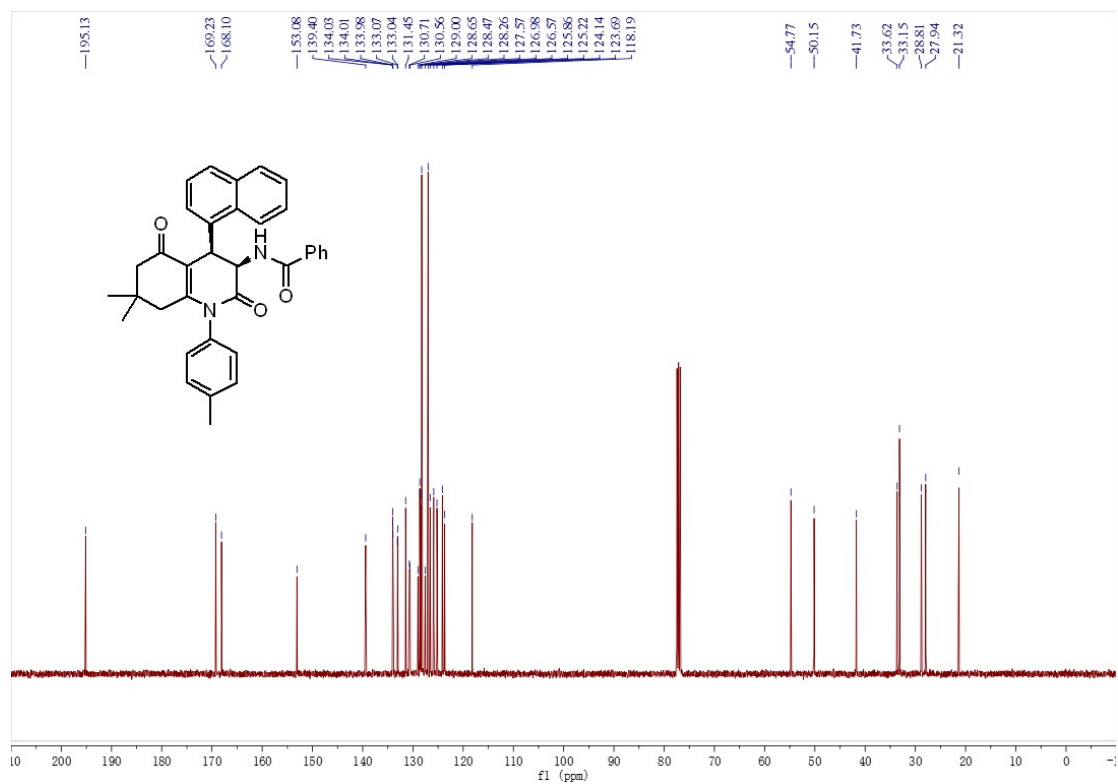

**<sup>1</sup>H and <sup>13</sup>C NMR spectra for 4p**

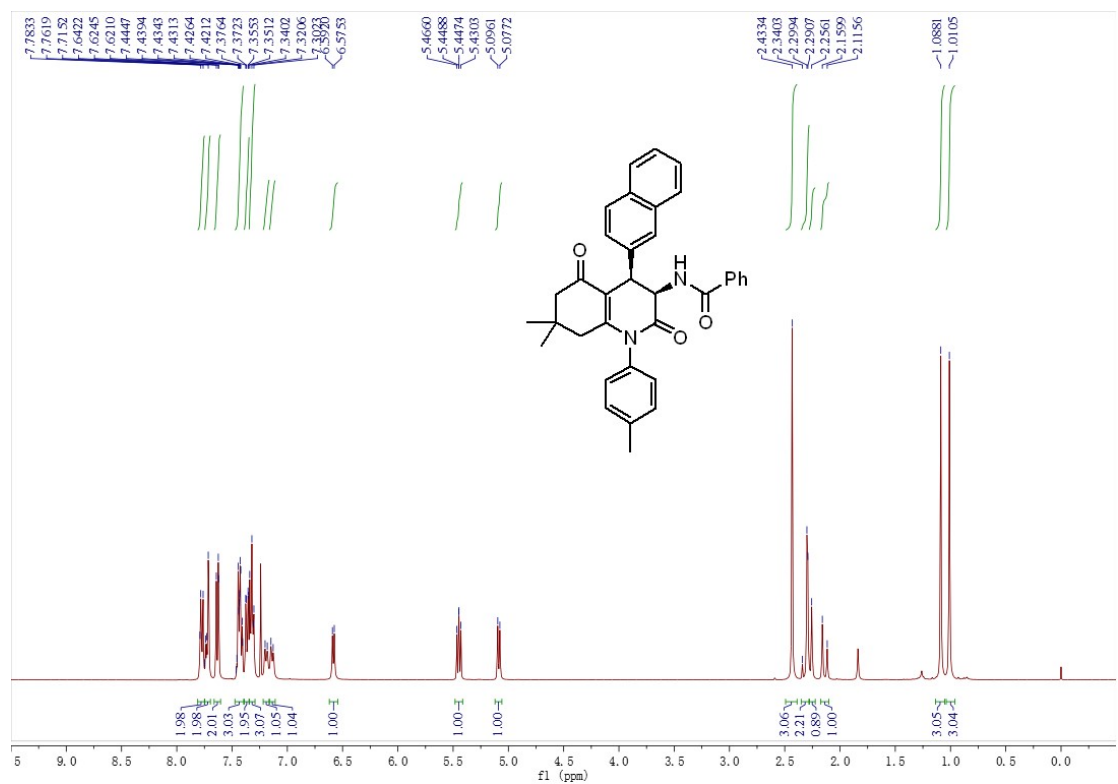

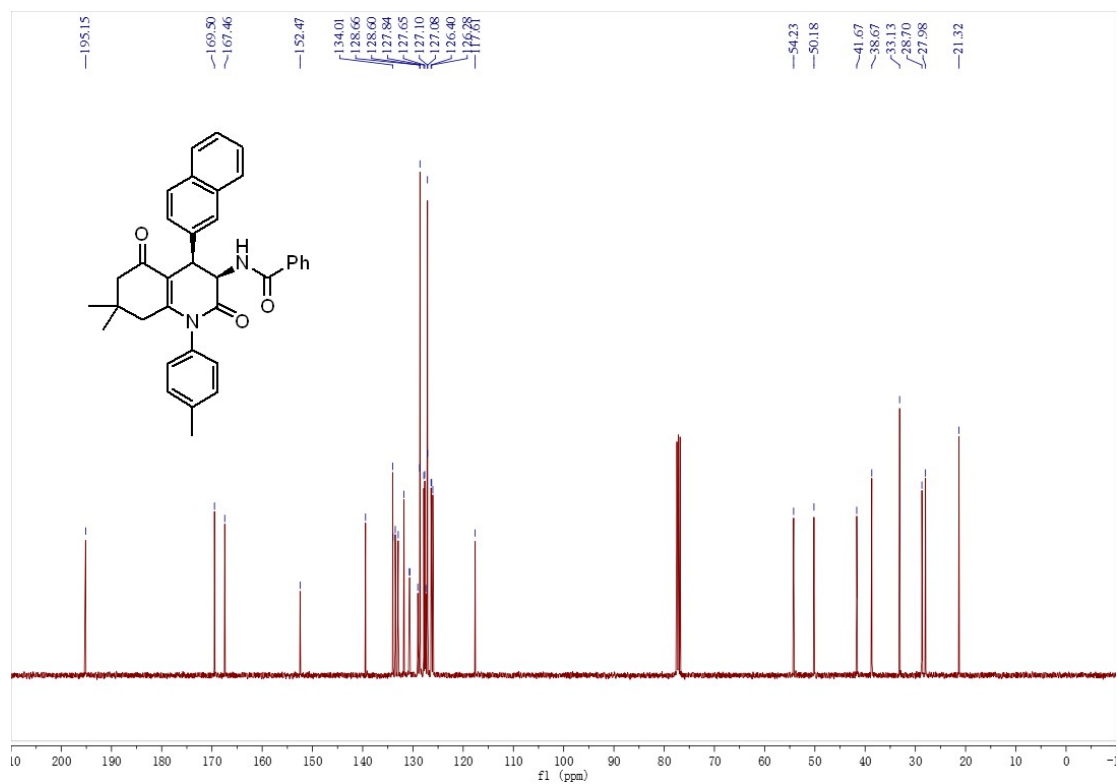

**<sup>1</sup>H and <sup>13</sup>C NMR spectra for 4q**

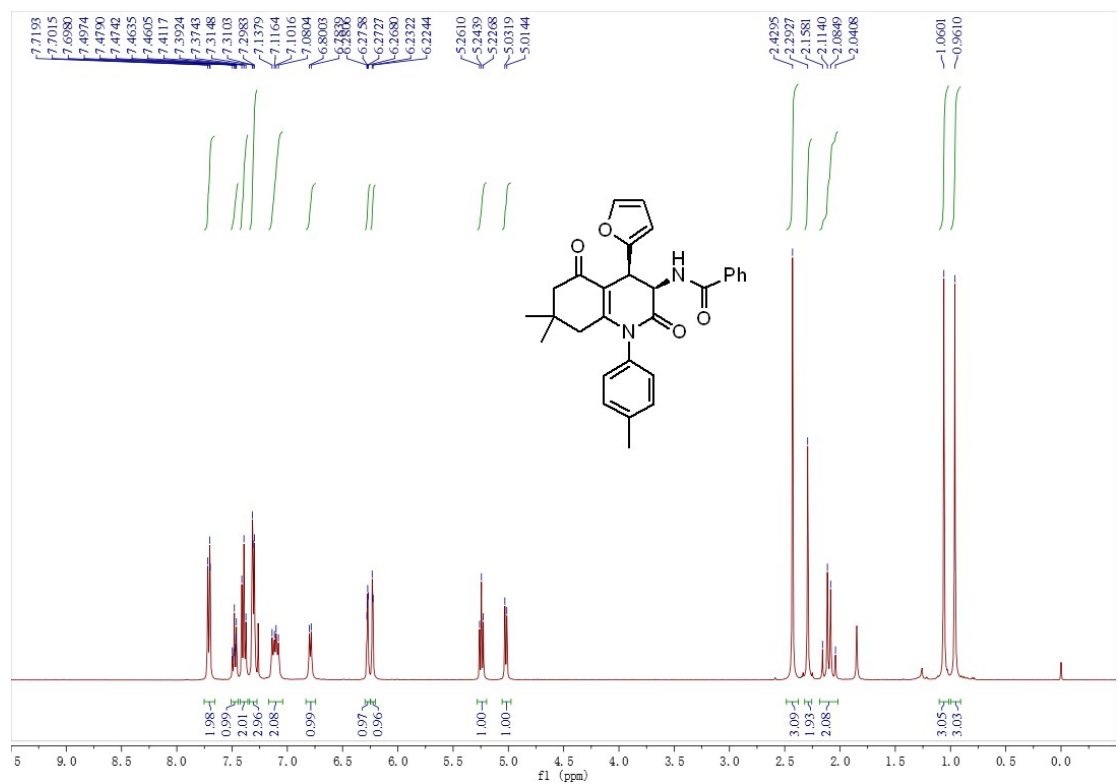

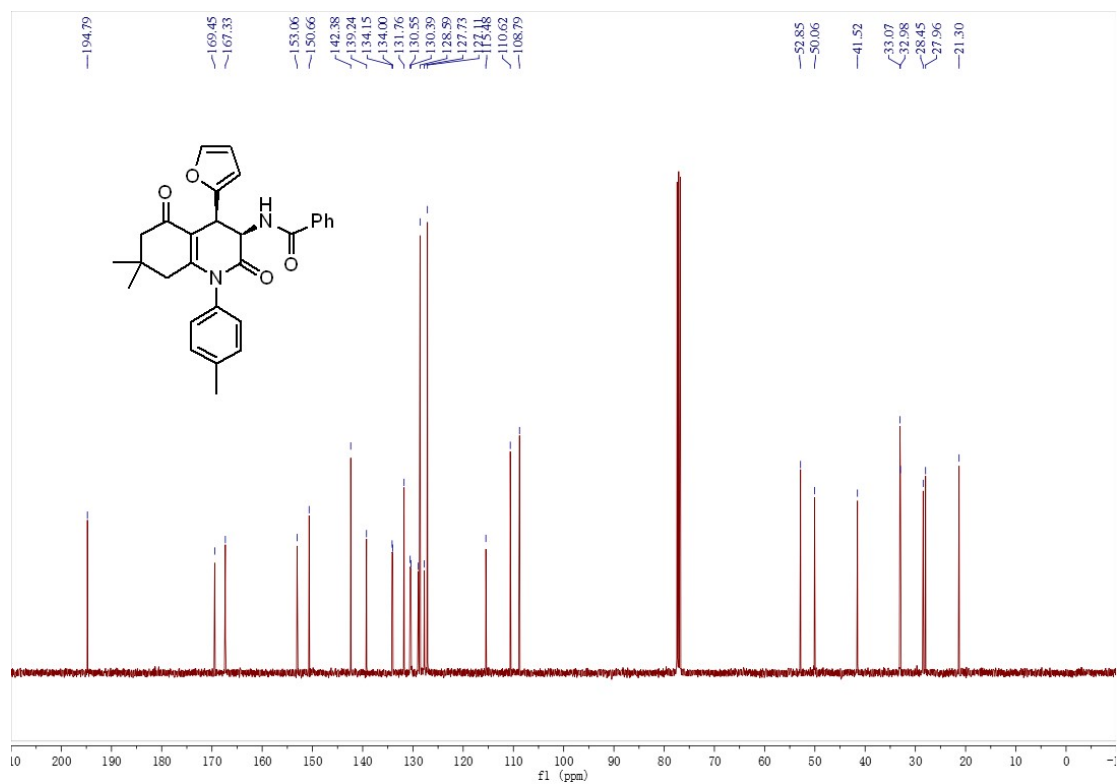

**<sup>1</sup>H and <sup>13</sup>C NMR spectra for 4r**

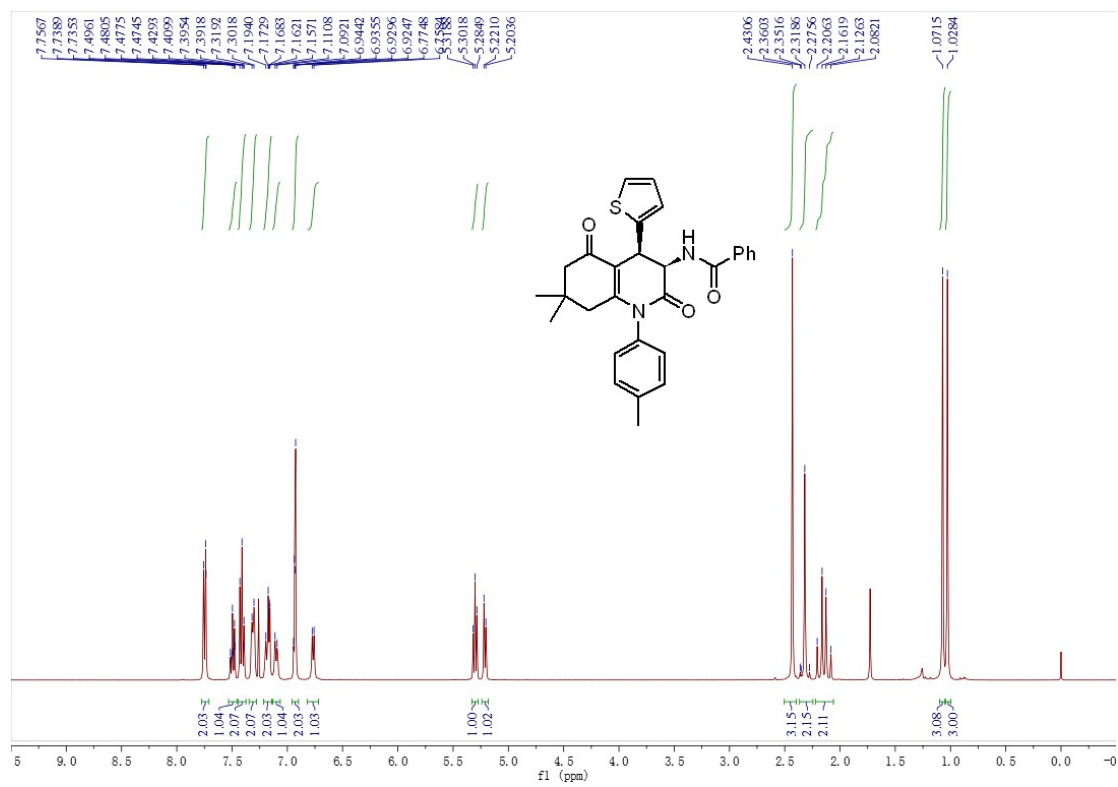



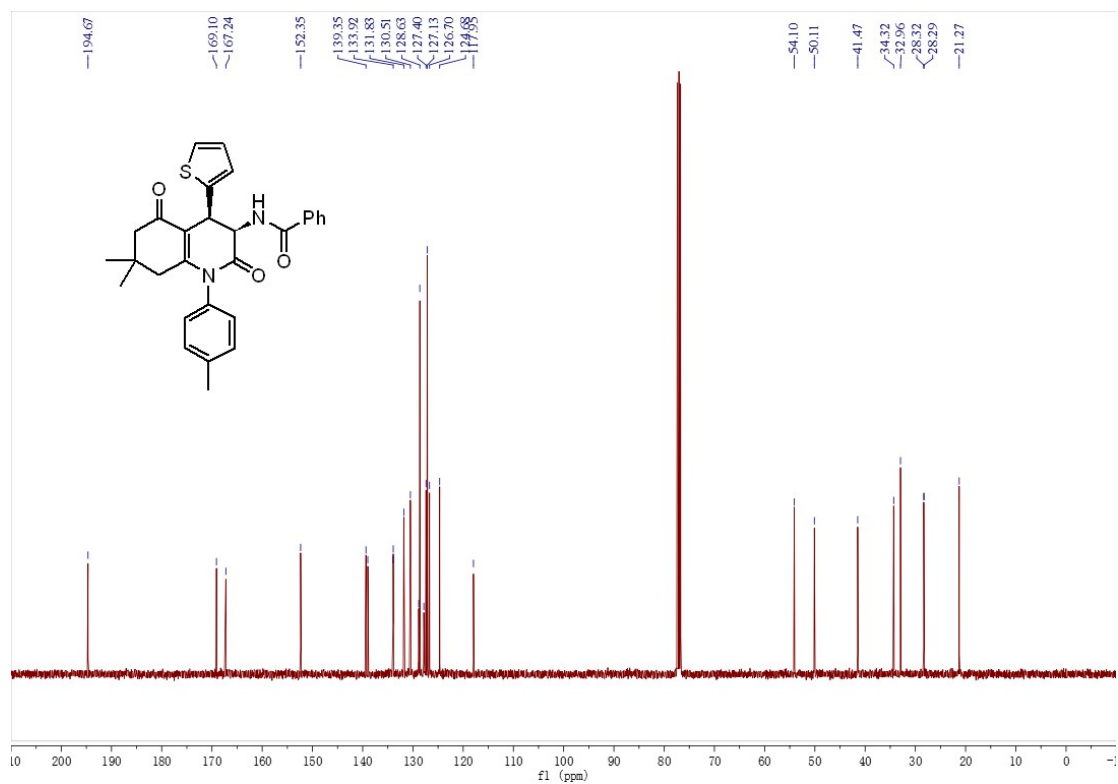

$^1\text{H}$  and  $^{13}\text{C}$  NMR spectra for 4s

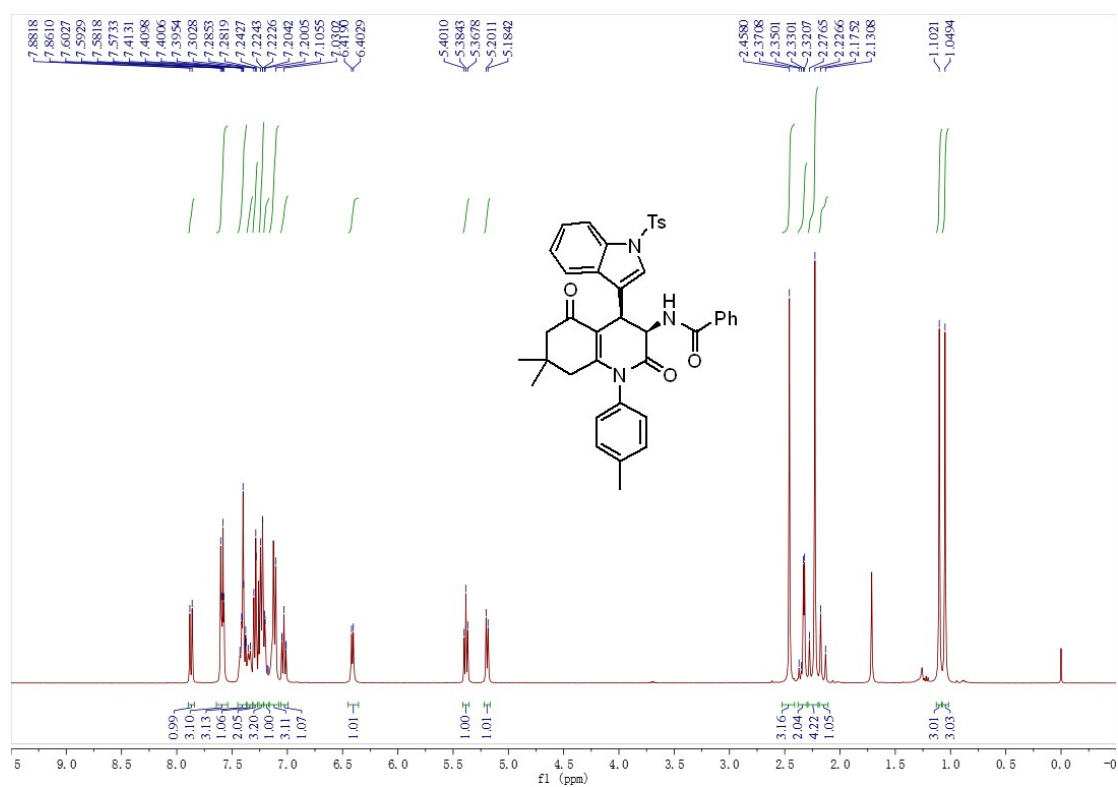

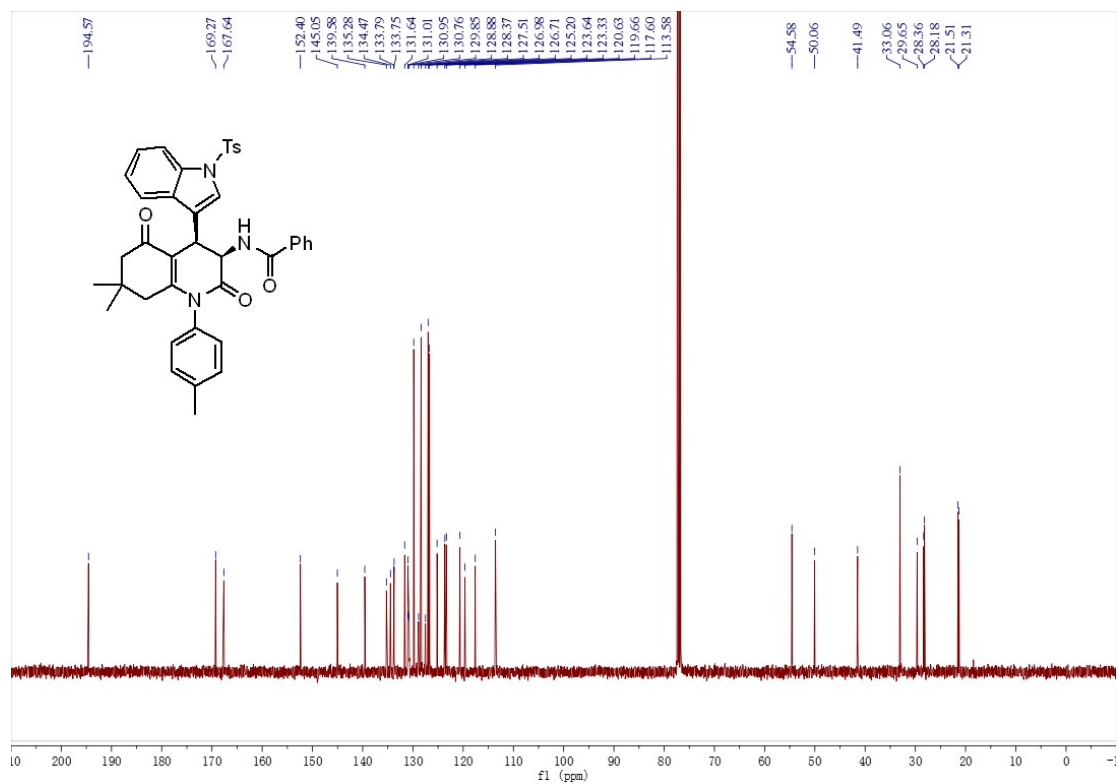

**<sup>1</sup>H and <sup>13</sup>C NMR spectra for 4t**

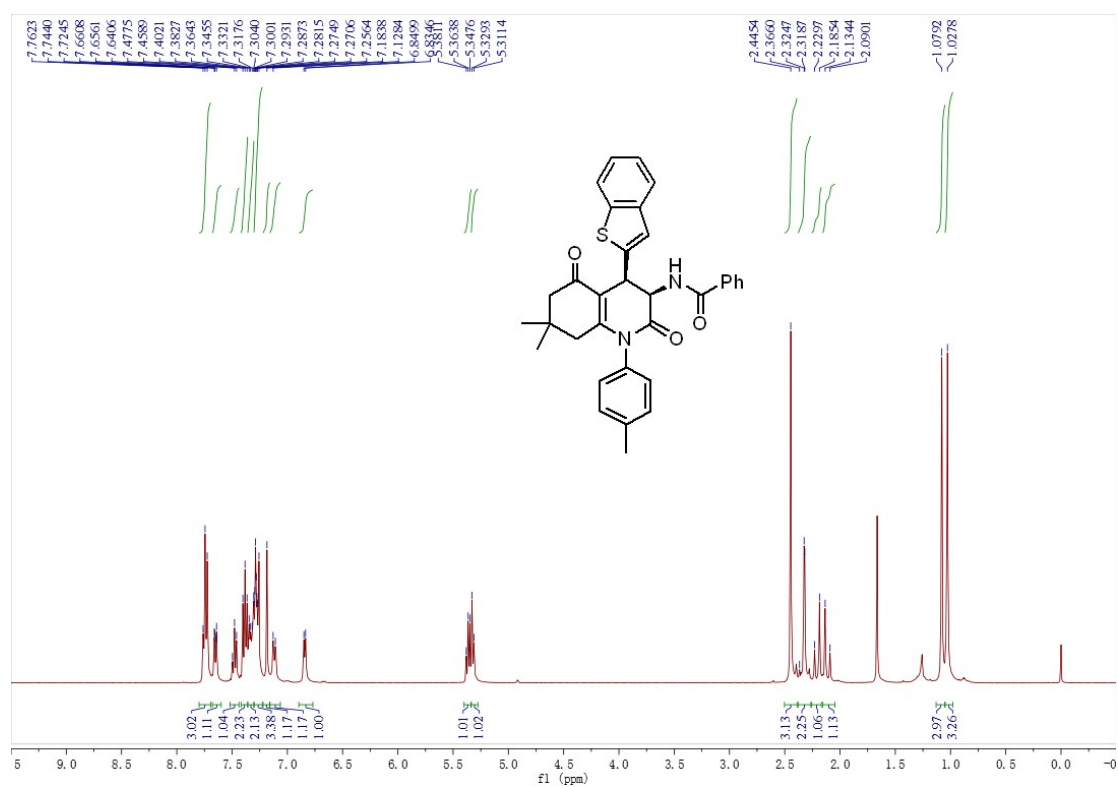

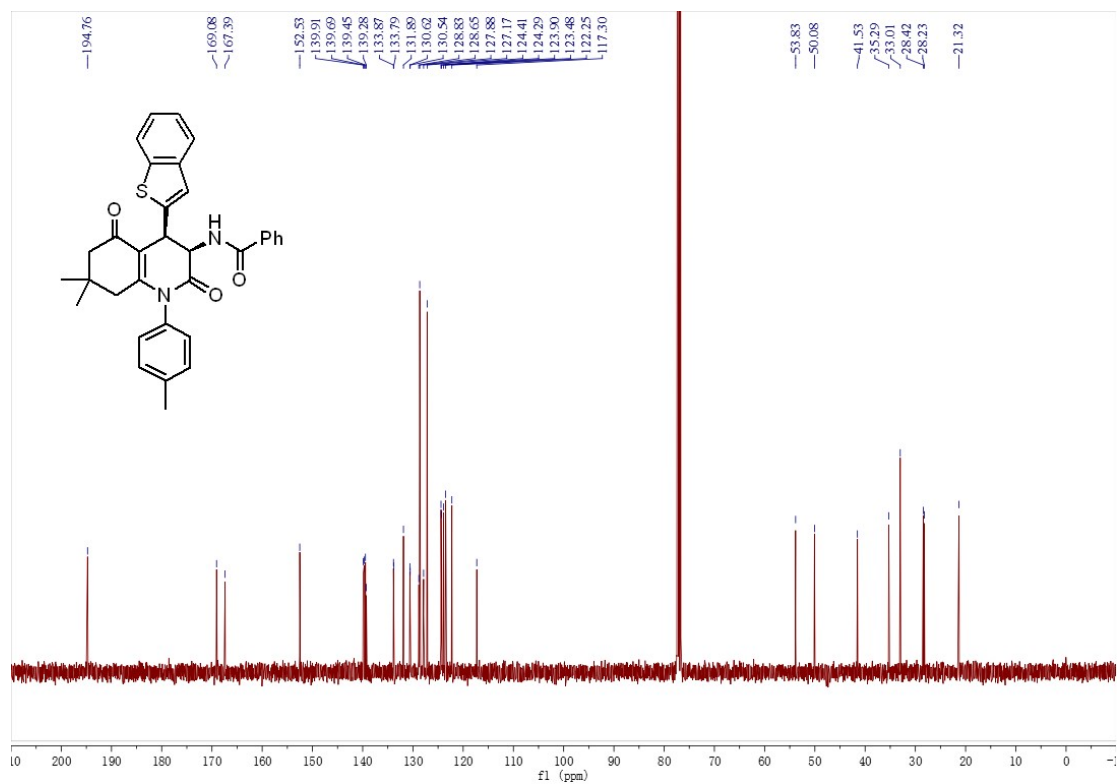

**<sup>1</sup>H and <sup>13</sup>C NMR spectra for 4v**

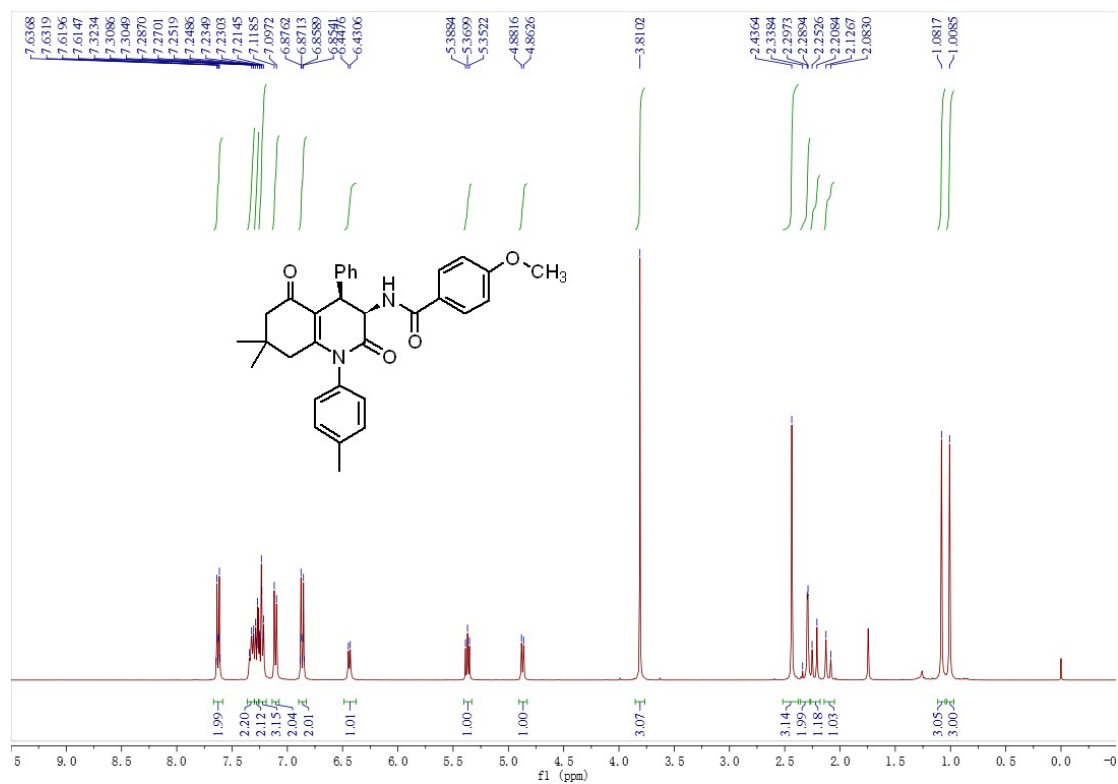

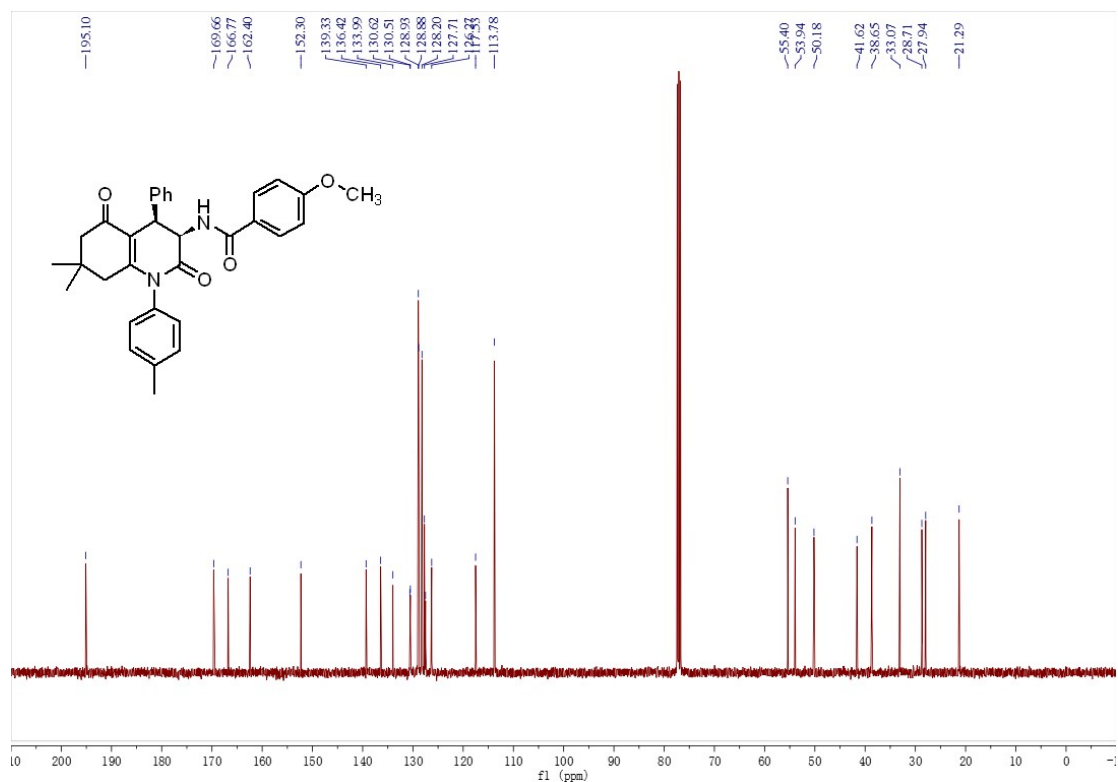

<sup>1</sup>H, <sup>13</sup>C and <sup>19</sup>F NMR spectra for 4w

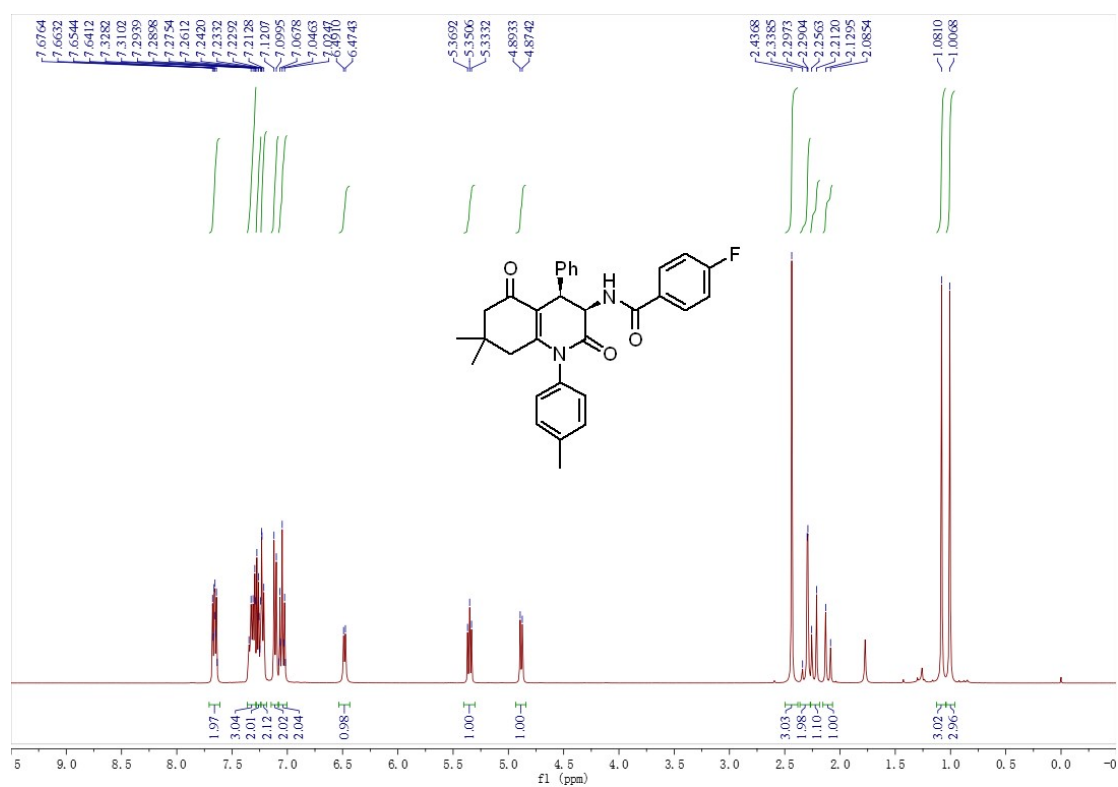

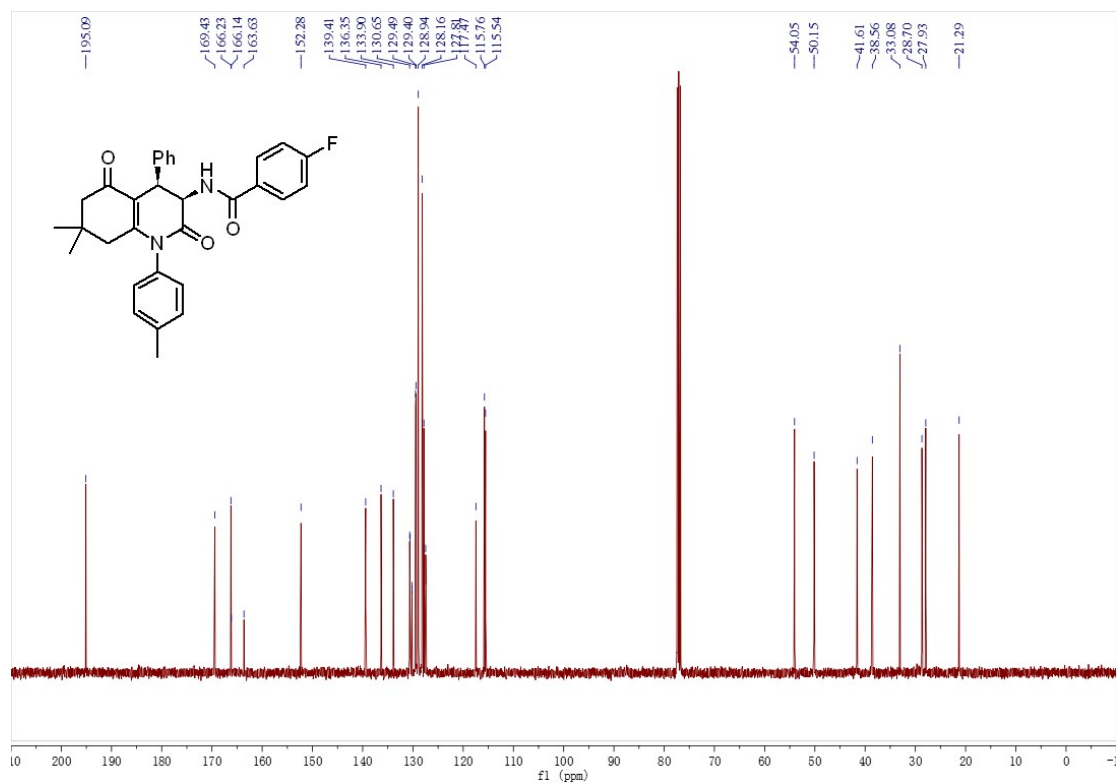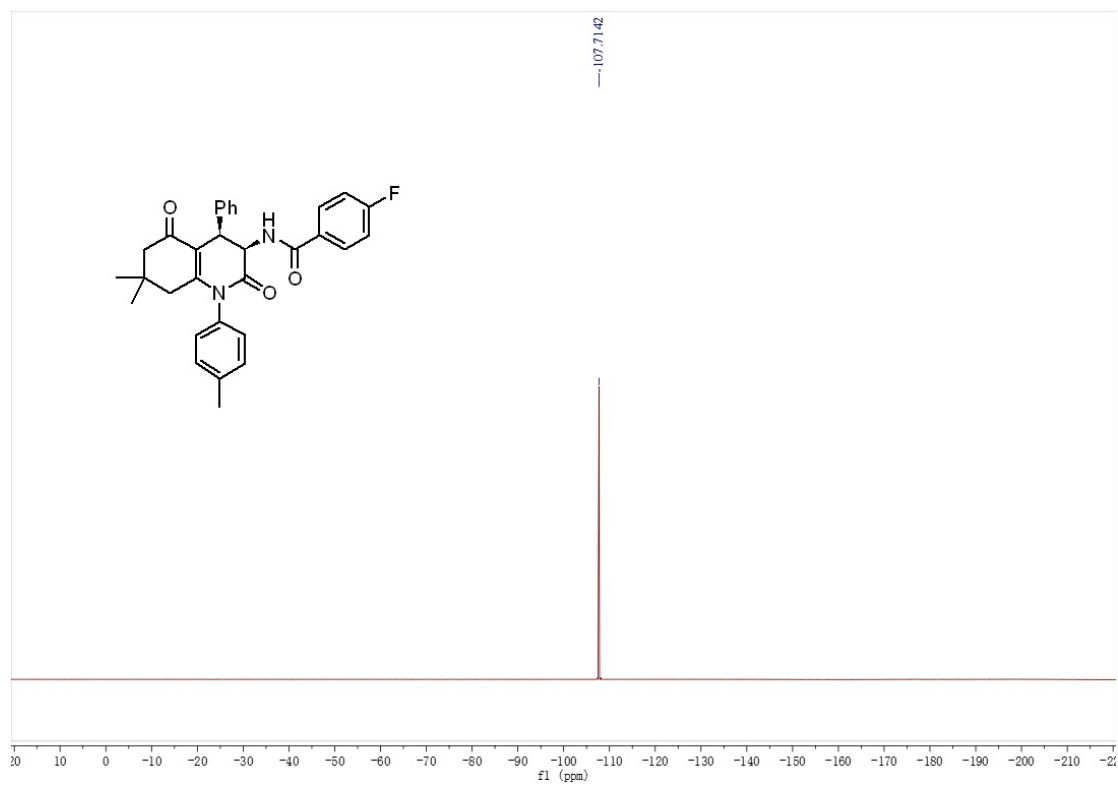

### <sup>1</sup>H and <sup>13</sup>C NMR spectra for 4x

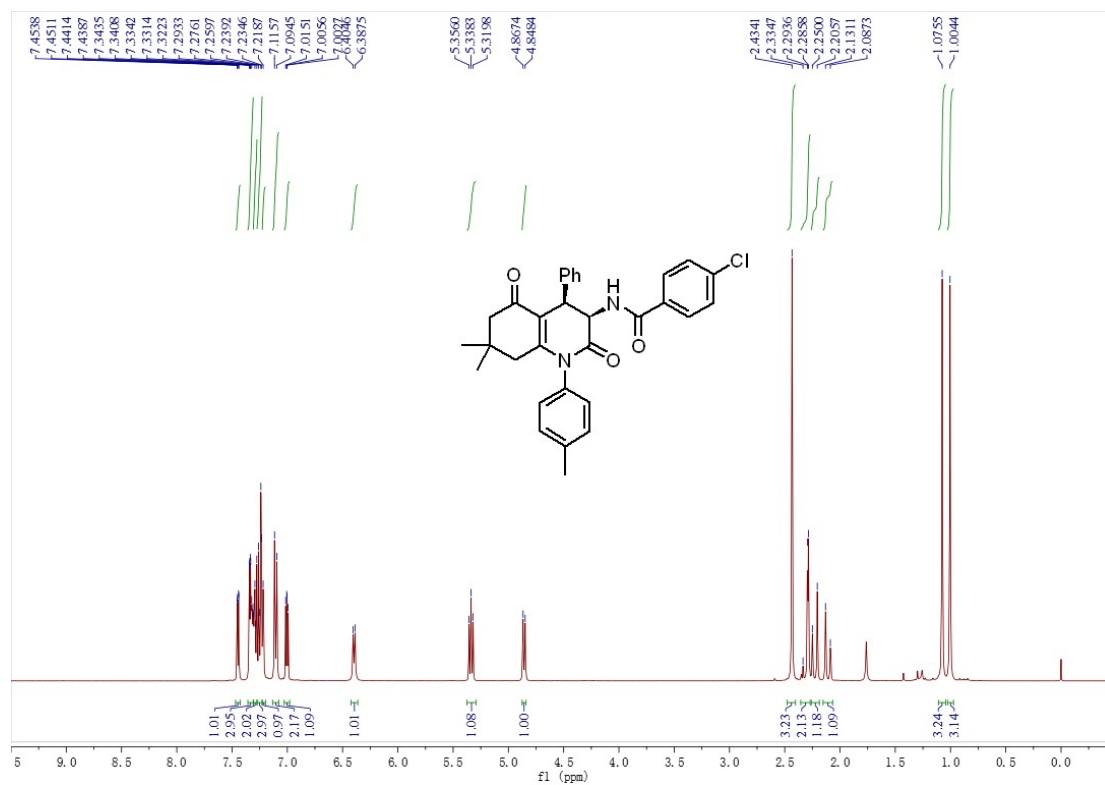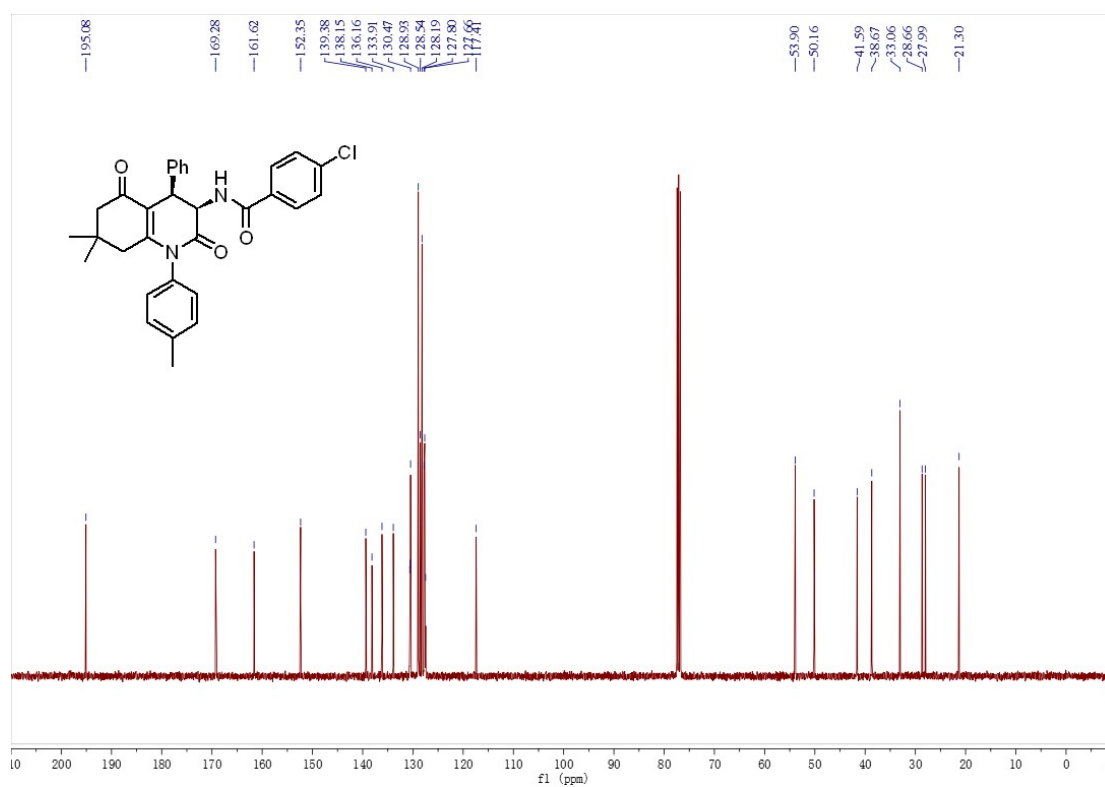

# <sup>1</sup>H and <sup>13</sup>C NMR spectra for 4y

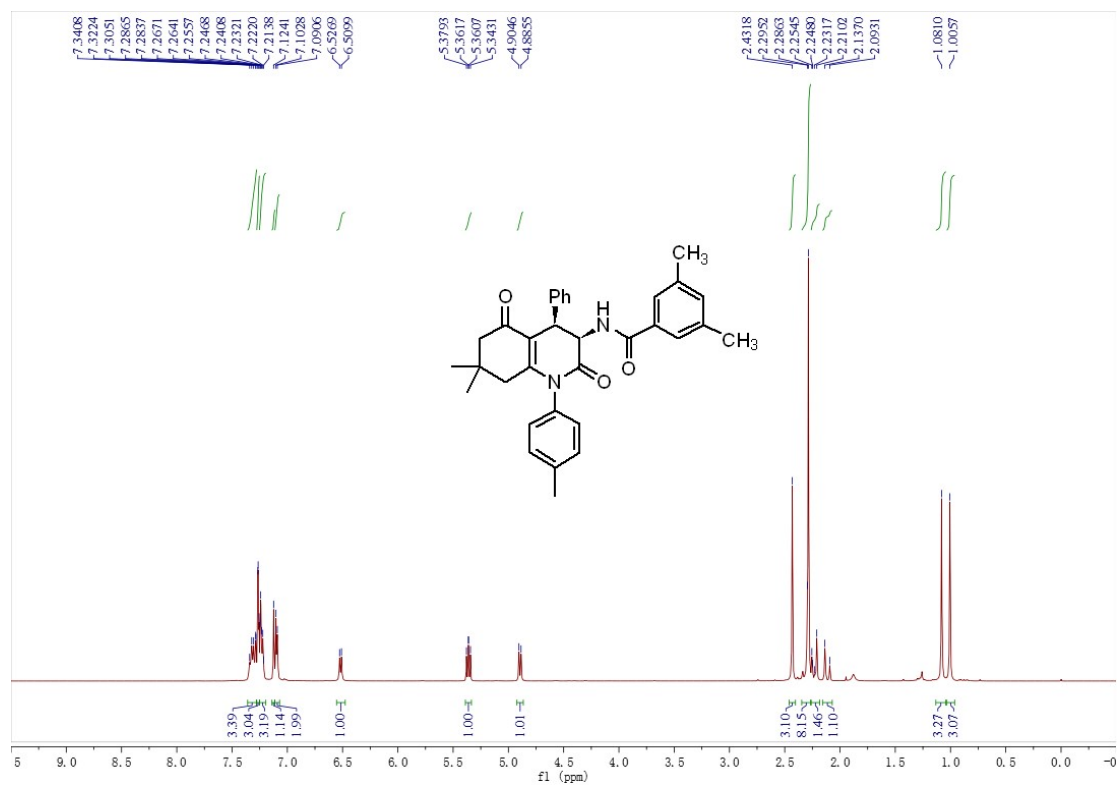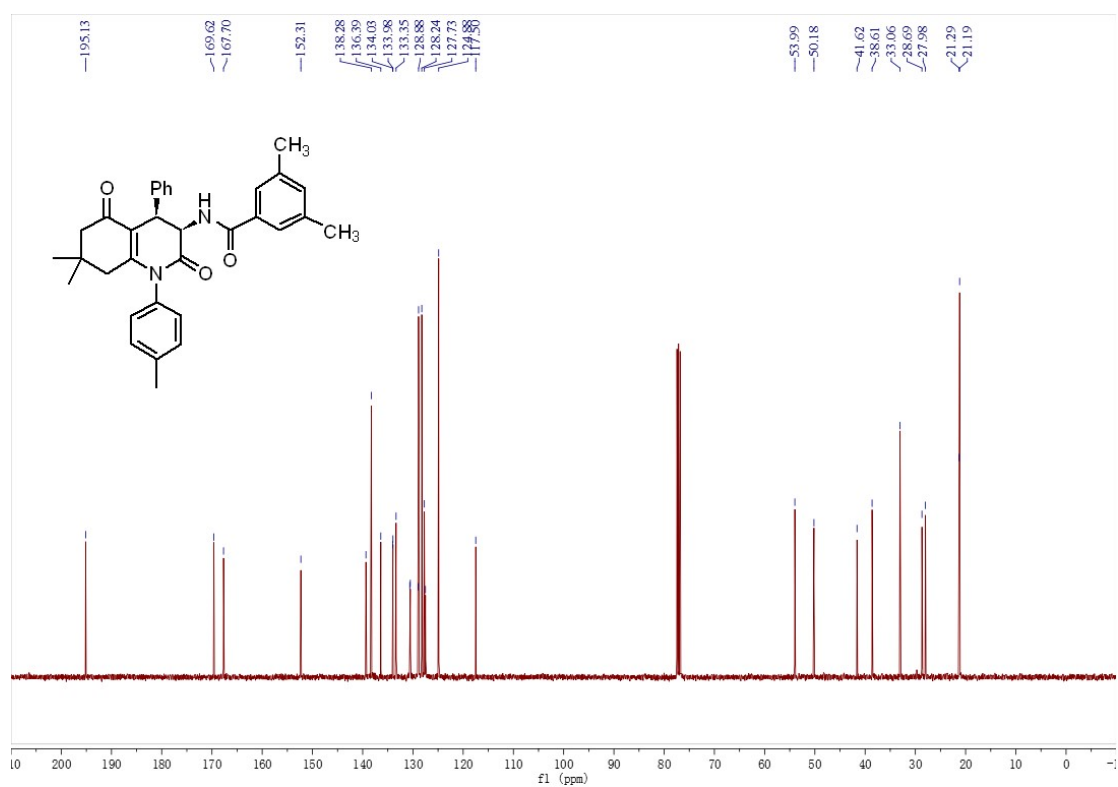

### <sup>1</sup>H and <sup>13</sup>C NMR spectra for 4z

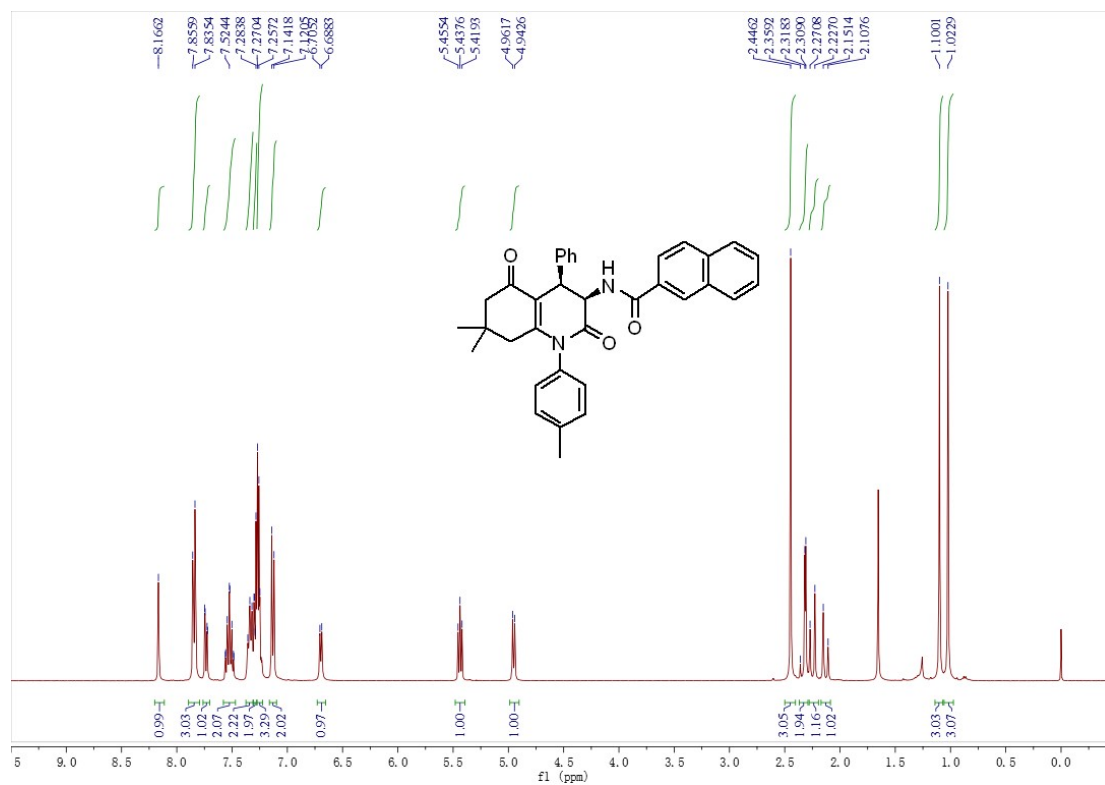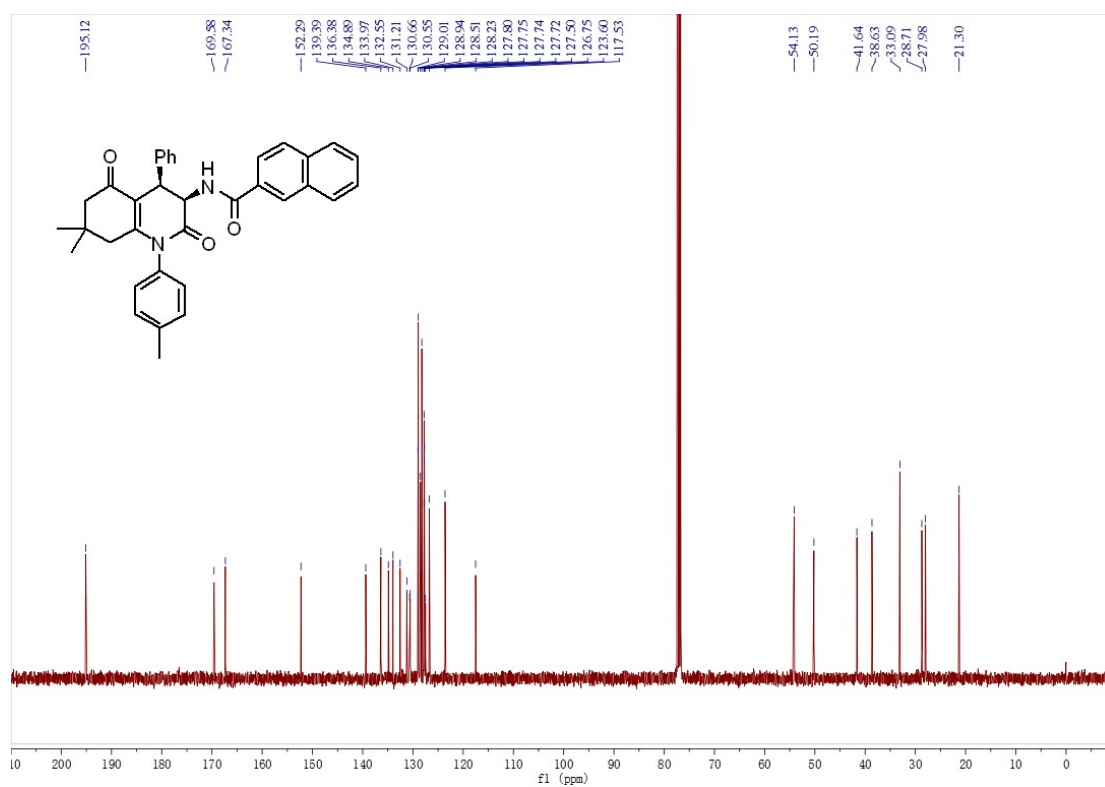



# <sup>1</sup>H and <sup>13</sup>C NMR spectra for 4a'

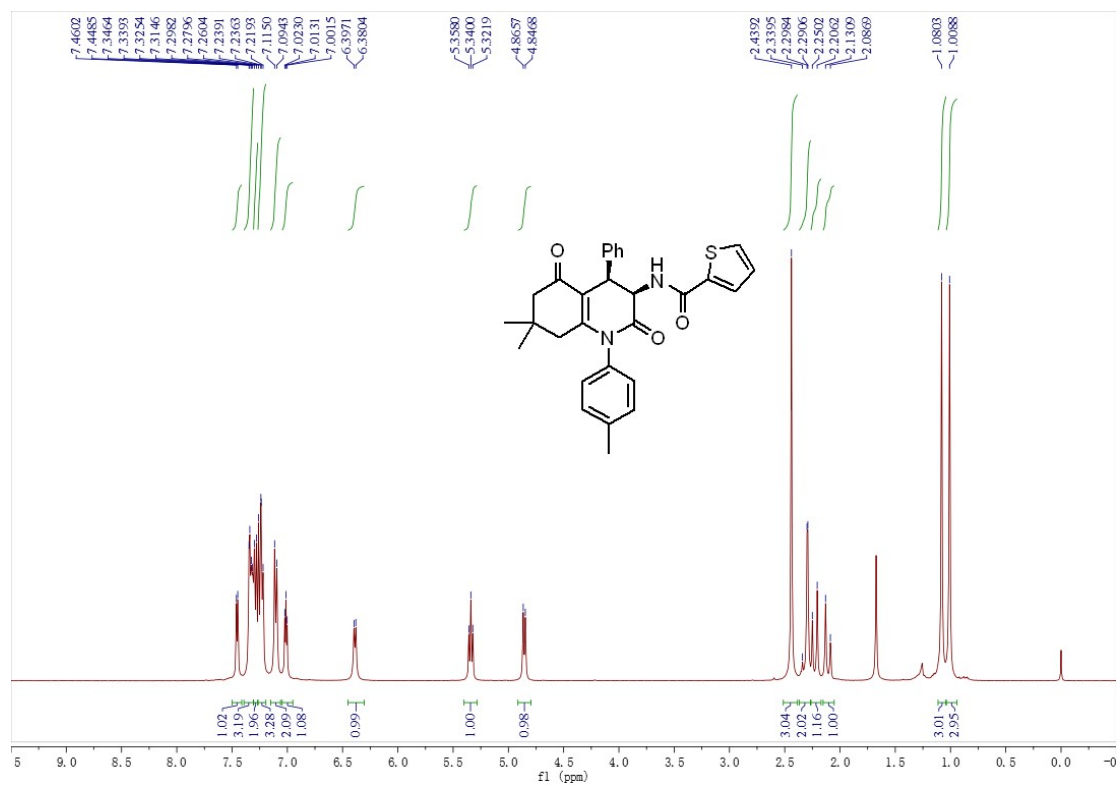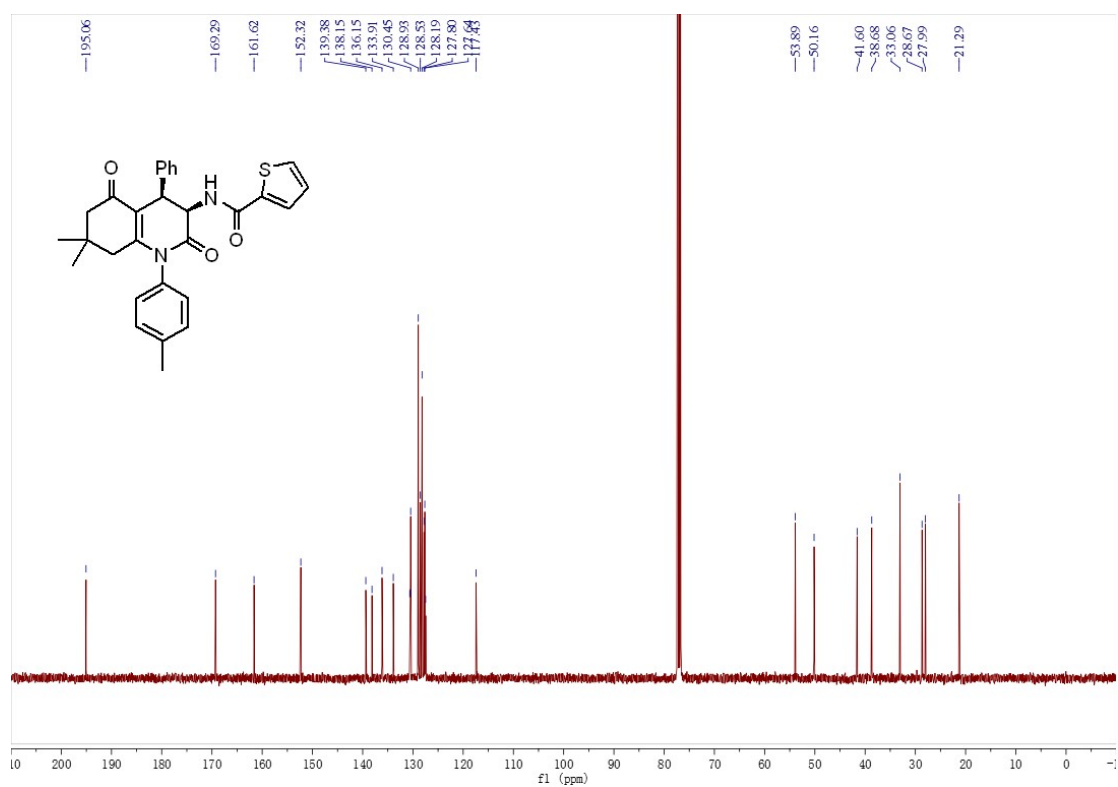

## 5. $^1\text{H}$ , $^{13}\text{C}$ and $^{19}\text{F}$ NMR spectra for compounds 7, 9, 10, 12 and 13

### $^1\text{H}$ and $^{13}\text{C}$ NMR spectra for 7

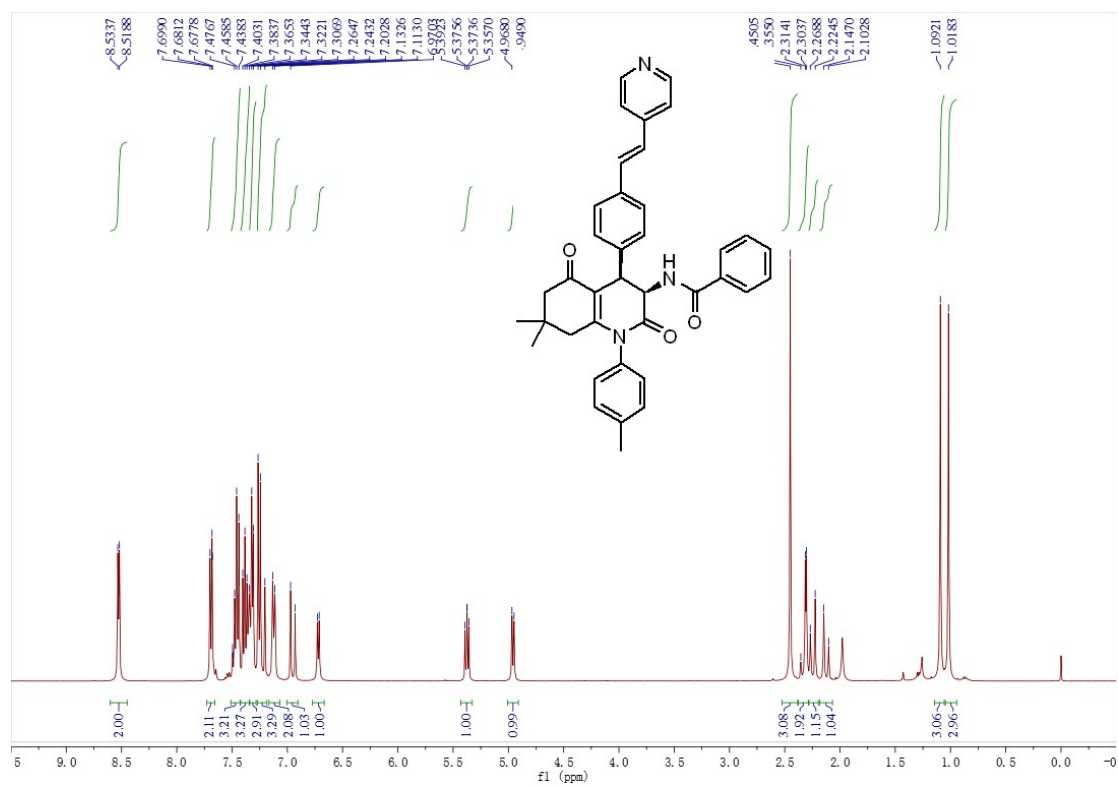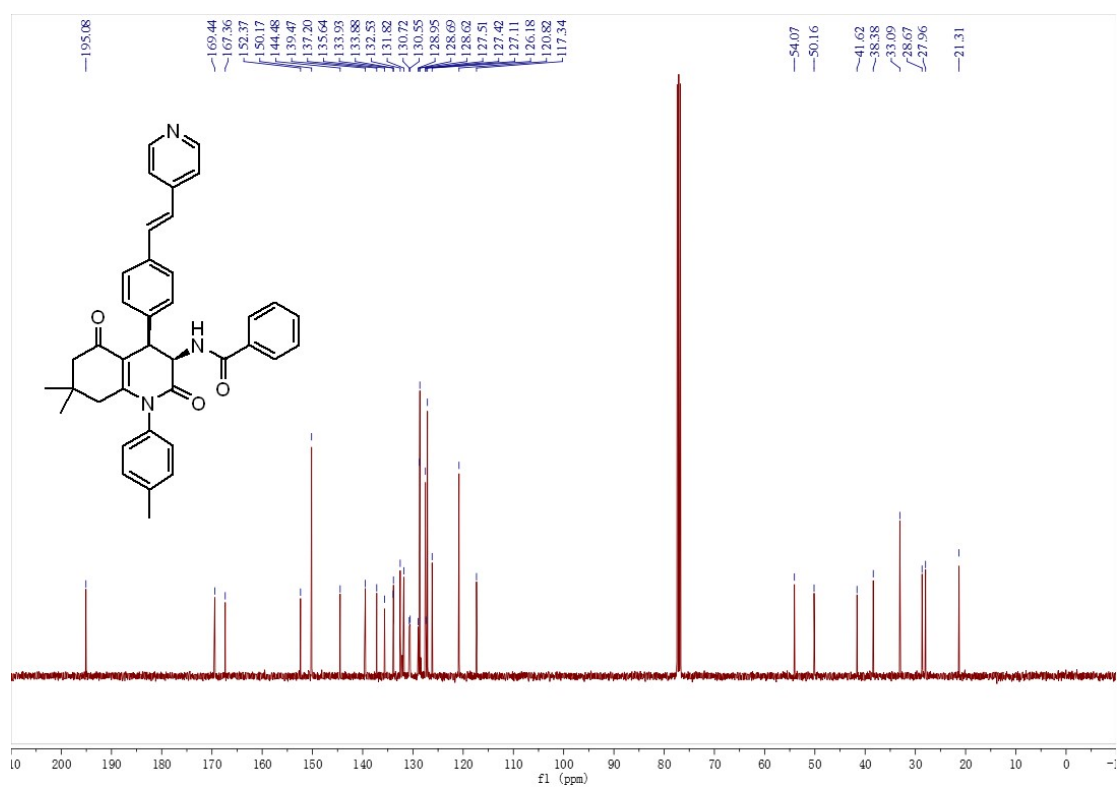

# <sup>1</sup>H and <sup>13</sup>C NMR spectra for 9

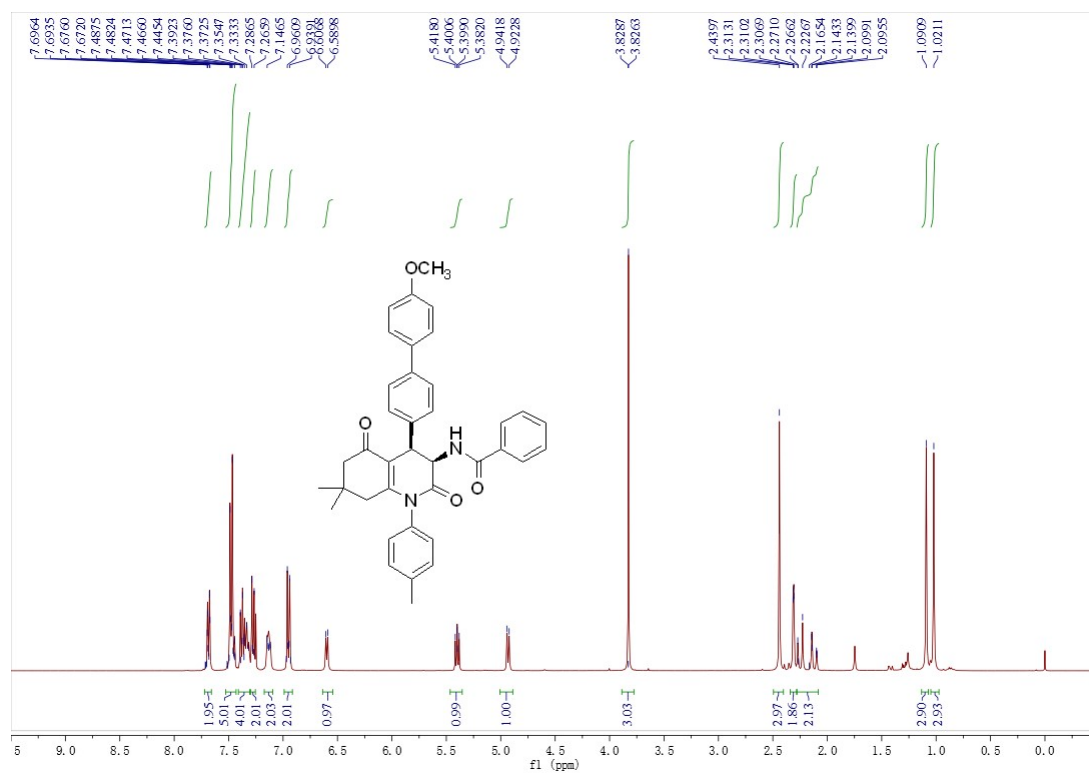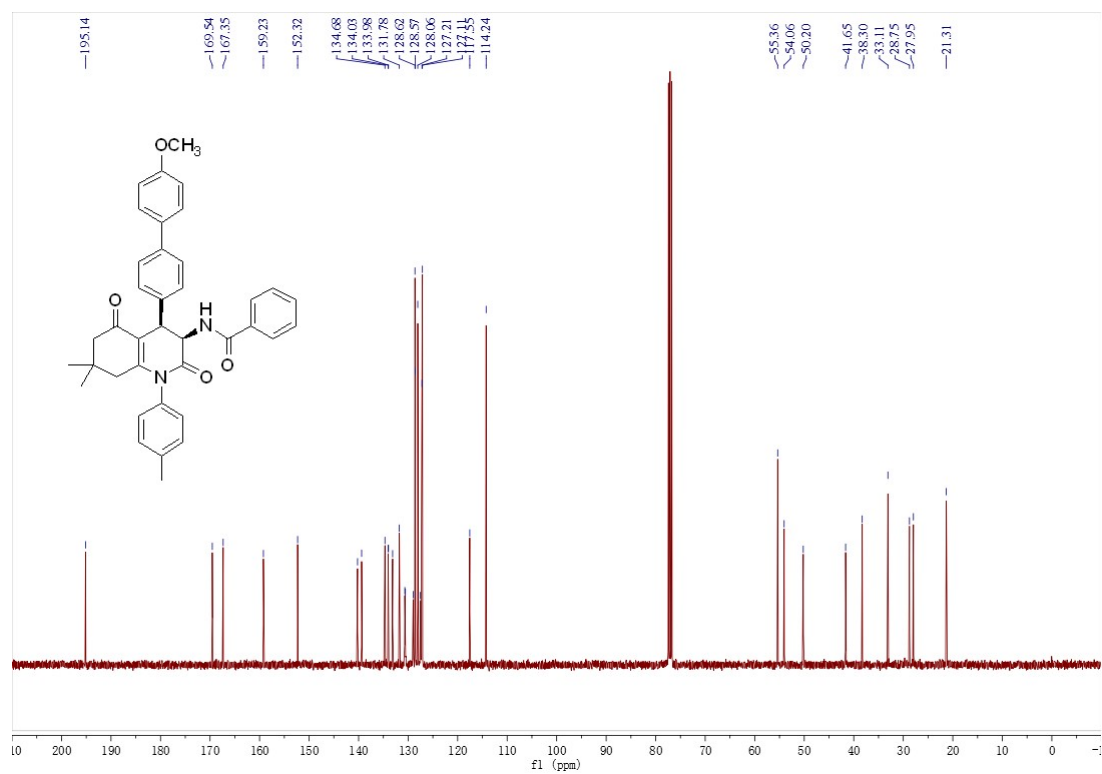

# <sup>1</sup>H and <sup>13</sup>C NMR spectra for 10

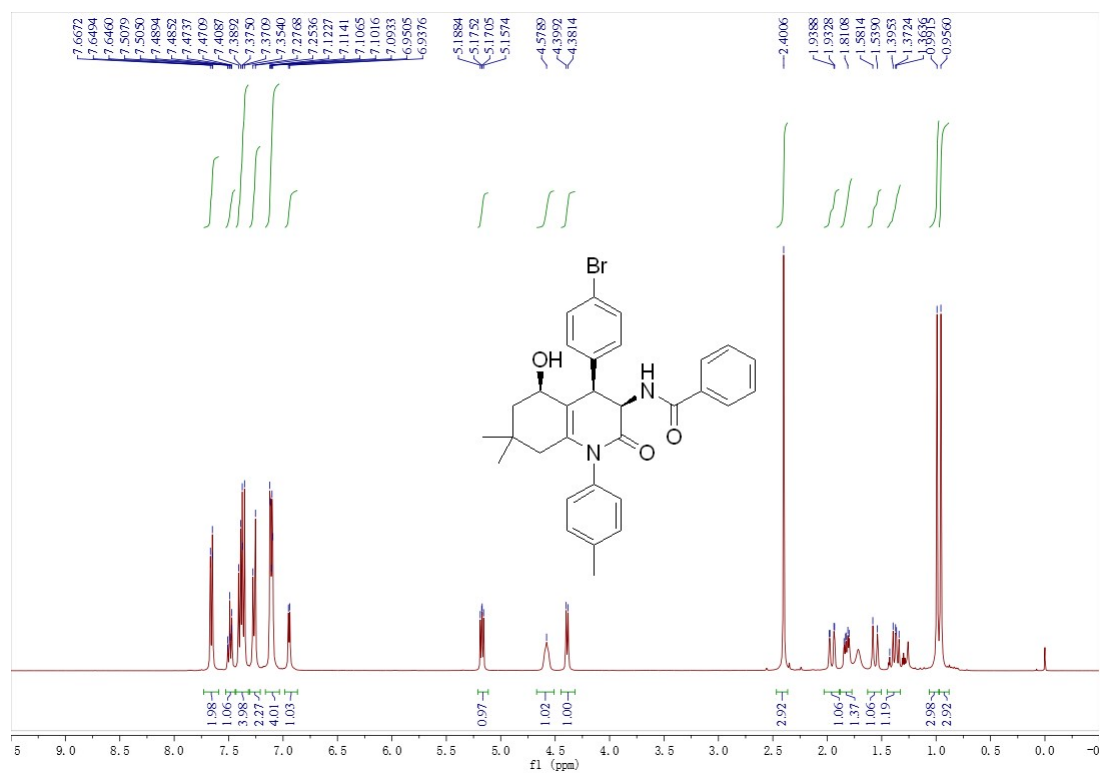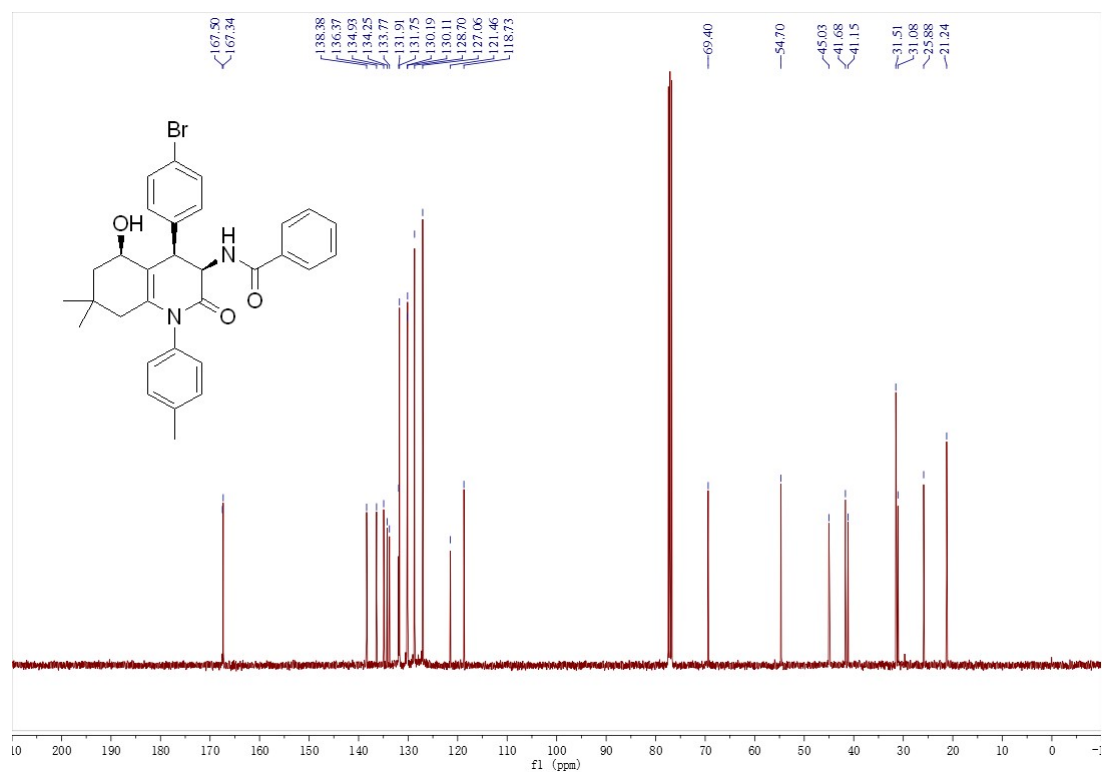

# <sup>1</sup>H, <sup>13</sup>C and <sup>19</sup>F NMR spectra for 12

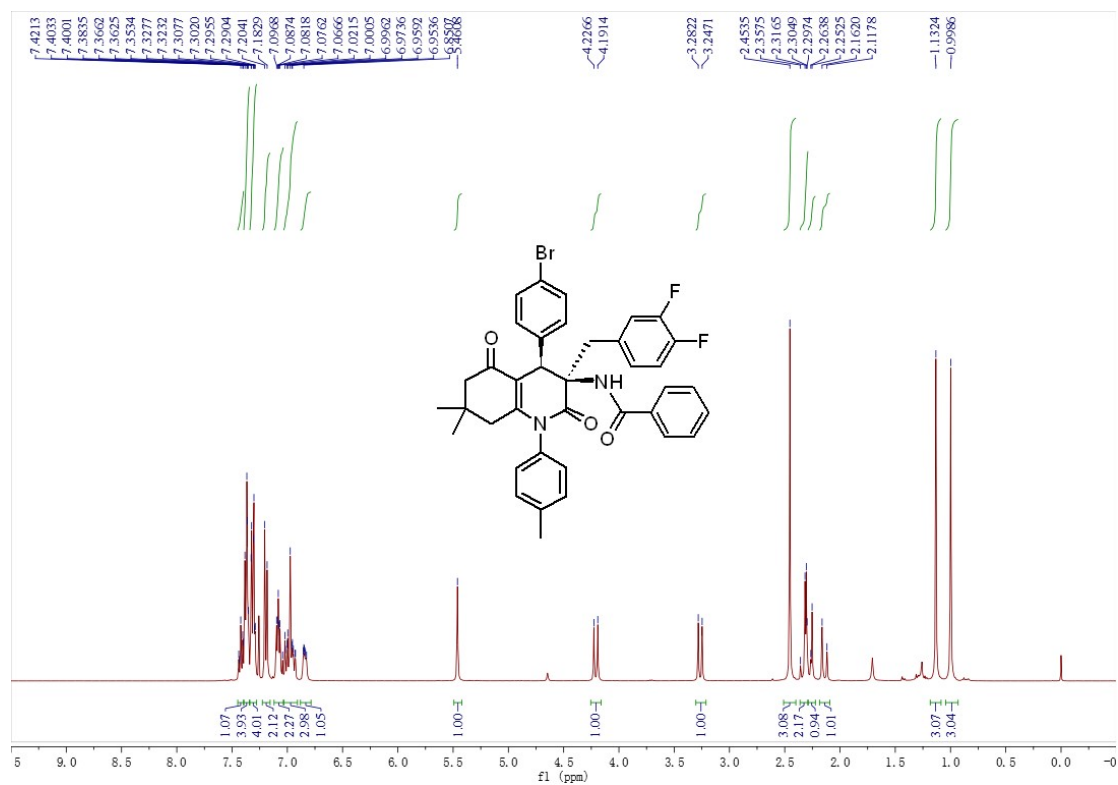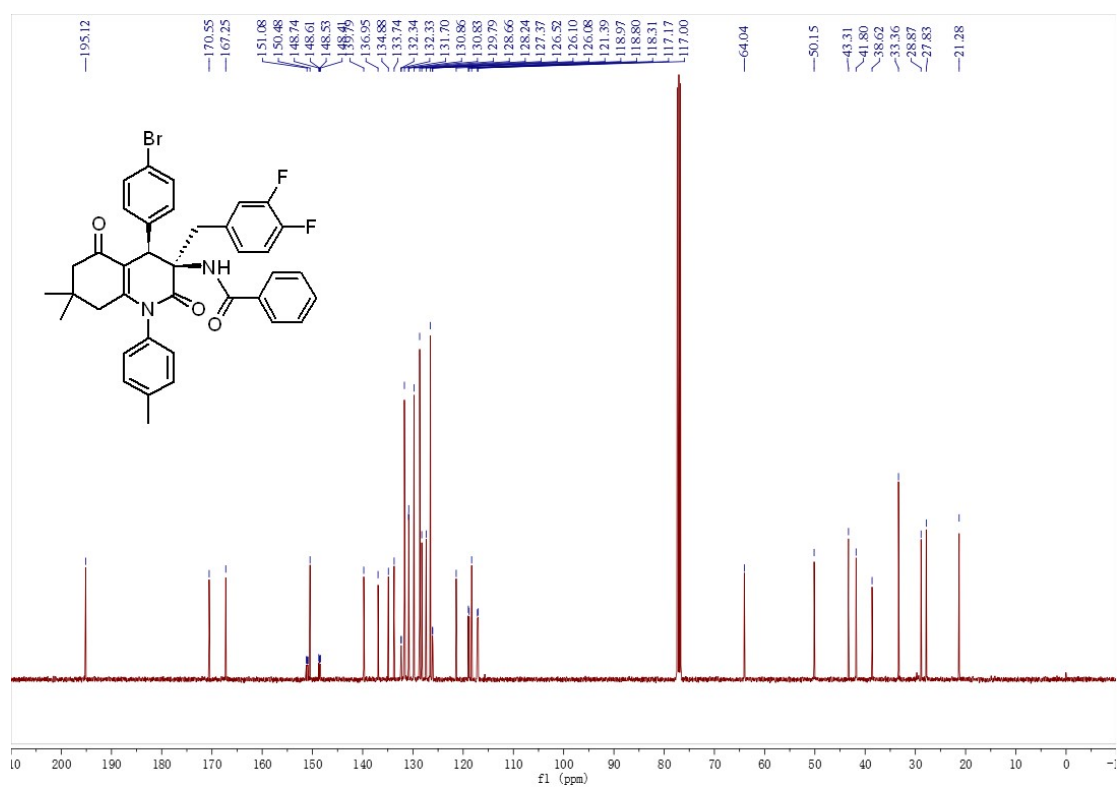

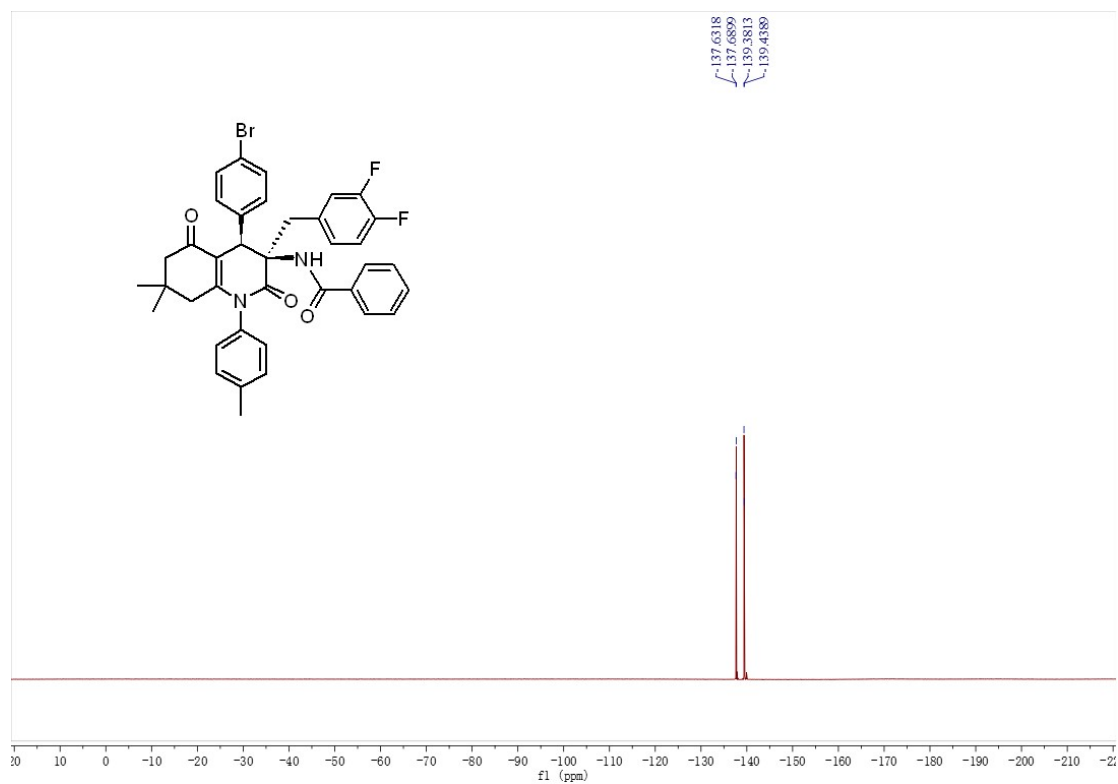

### <sup>1</sup>H and <sup>13</sup>C NMR spectra for 13

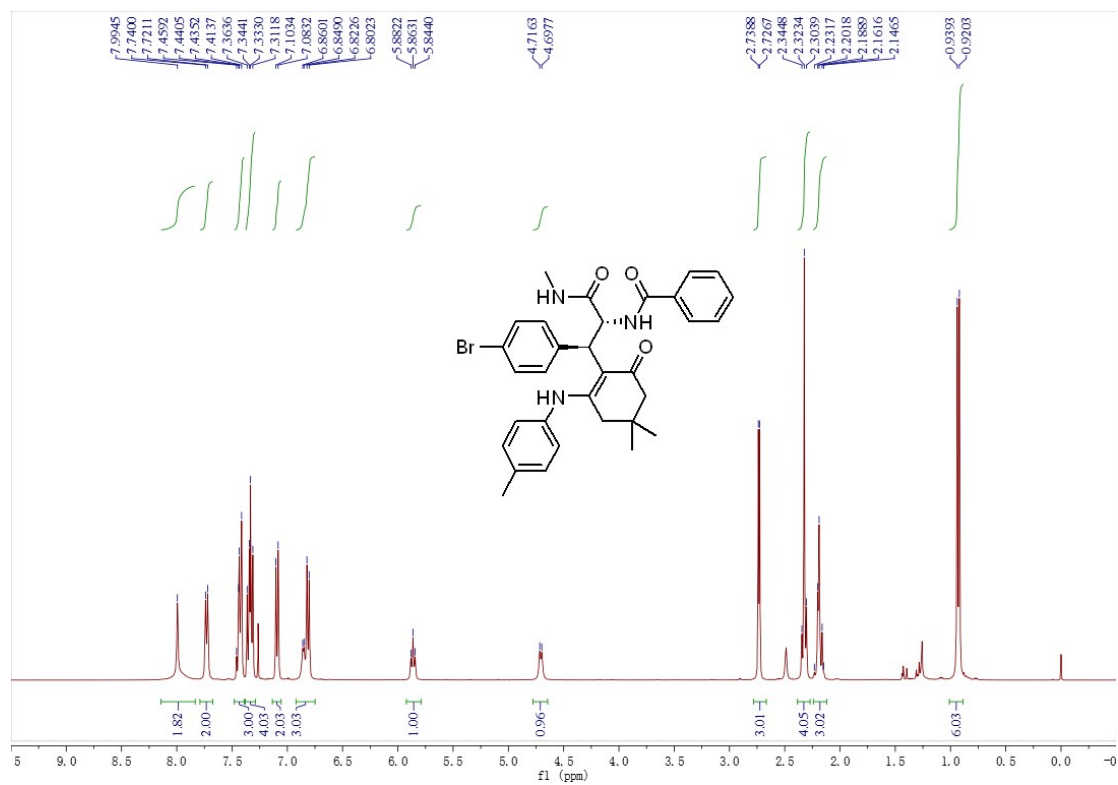

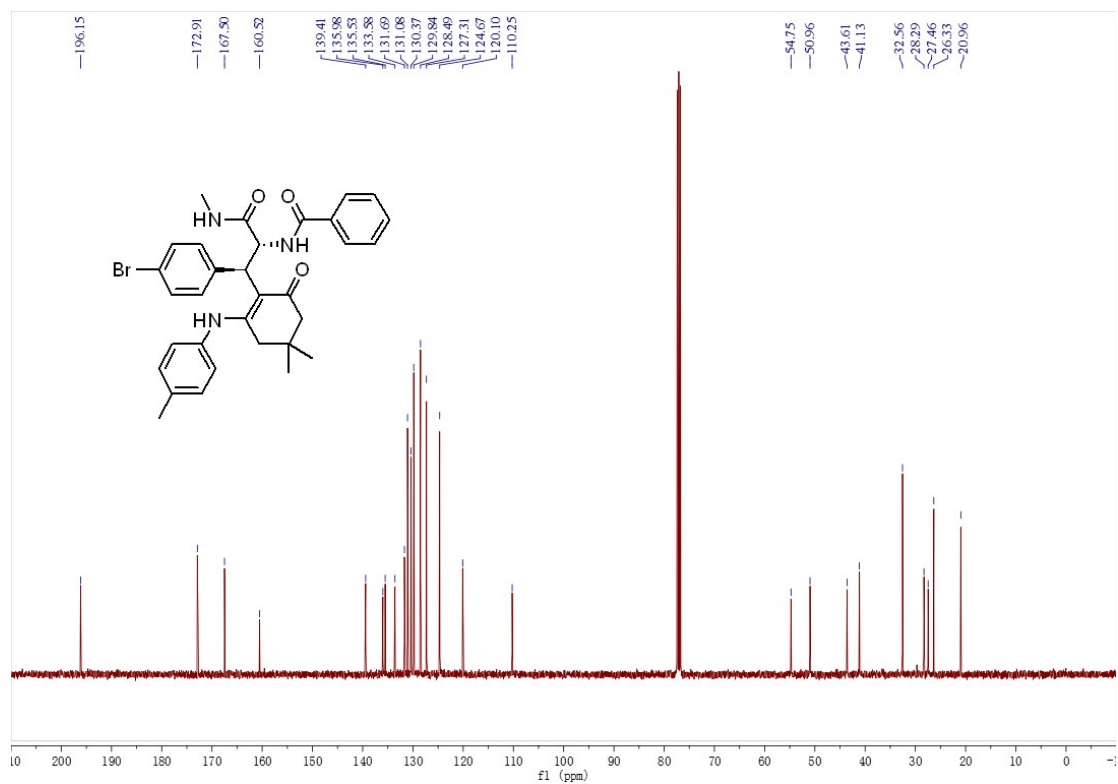

## 6. Chiral HPLC spectra for product 3a

### <Chromatogram>

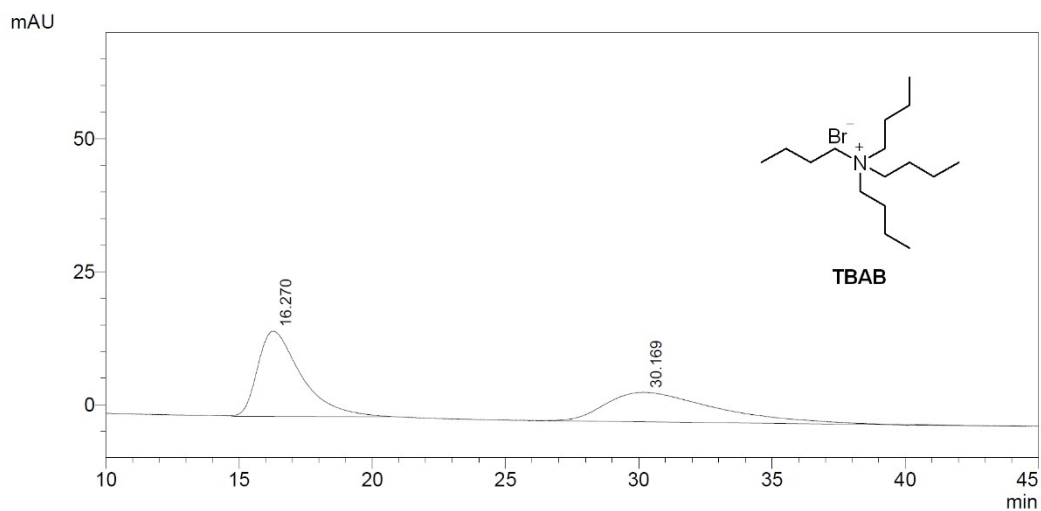

### <Peak Table>

| Peak# | Ret. Time | Area    | Height | Area % |
|-------|-----------|---------|--------|--------|
| 1     | 16.270    | 1814084 | 16020  | 52.864 |
| 2     | 30.169    | 1617523 | 5543   | 47.136 |

### <Chromatogram>

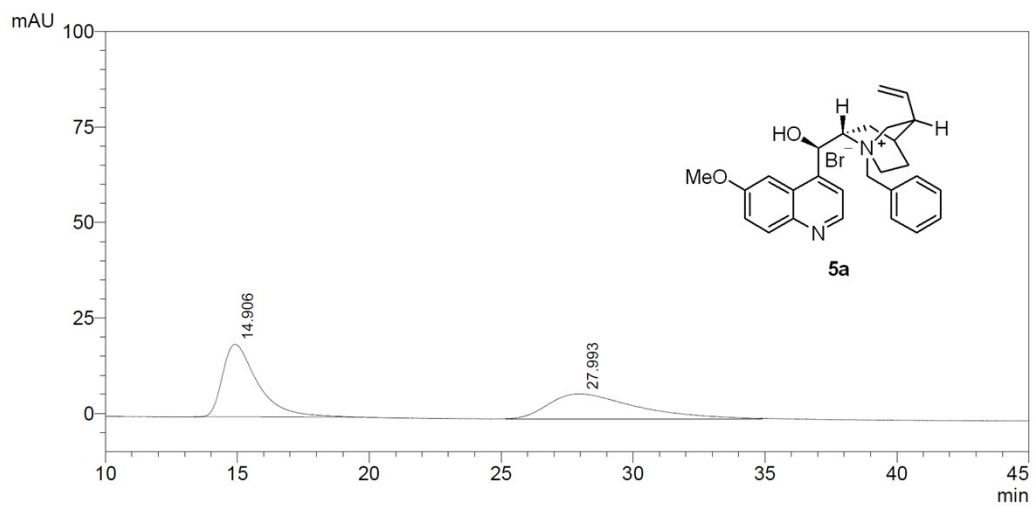

### <Peak Table>

| Peak# | Ret. Time | Area    | Height | Area % |
|-------|-----------|---------|--------|--------|
| 1     | 14.906    | 1745945 | 19025  | 53.343 |
| 2     | 27.993    | 1527078 | 6578   | 46.657 |



<Chromatogram>

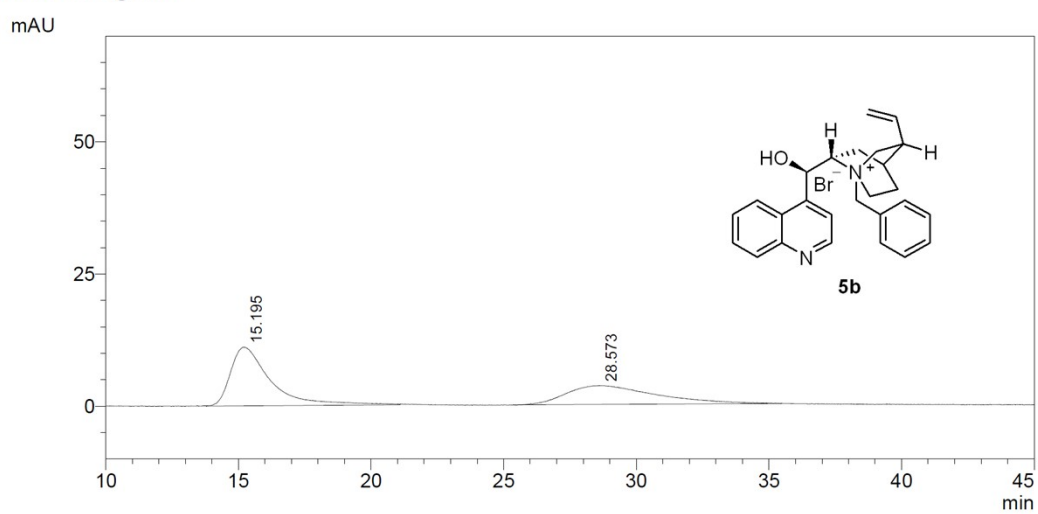

<Peak Table>

| Peak# | Ret. Time | Area    | Height | Area % |
|-------|-----------|---------|--------|--------|
| 1     | 15.195    | 1166524 | 11094  | 58.154 |
| 2     | 28.573    | 839407  | 3568   | 41.846 |

<Chromatogram>

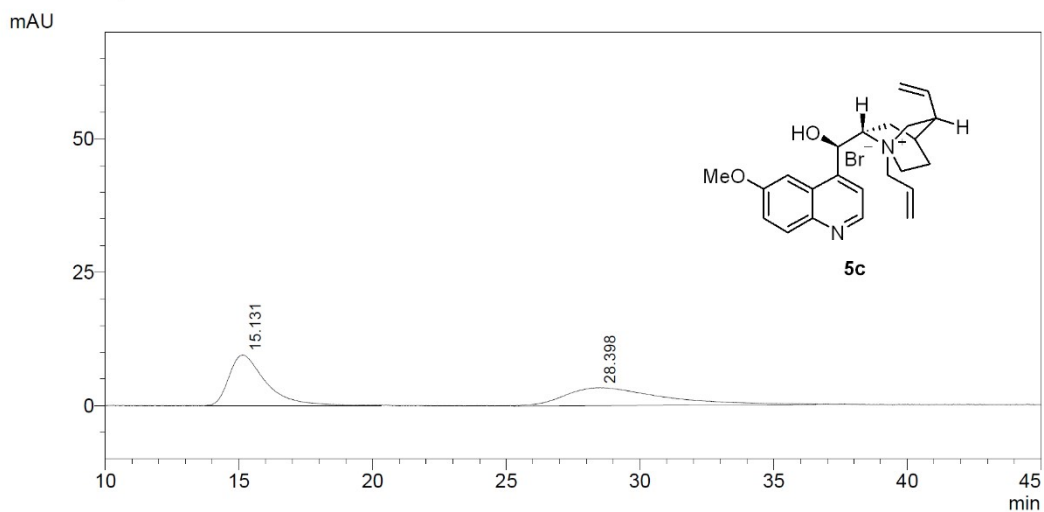

<Peak Table>

| Peak# | Ret. Time | Area   | Height | Area % |
|-------|-----------|--------|--------|--------|
| 1     | 15.131    | 922594 | 9517   | 51.563 |
| 2     | 28.398    | 866658 | 3397   | 48.437 |

<Chromatogram>

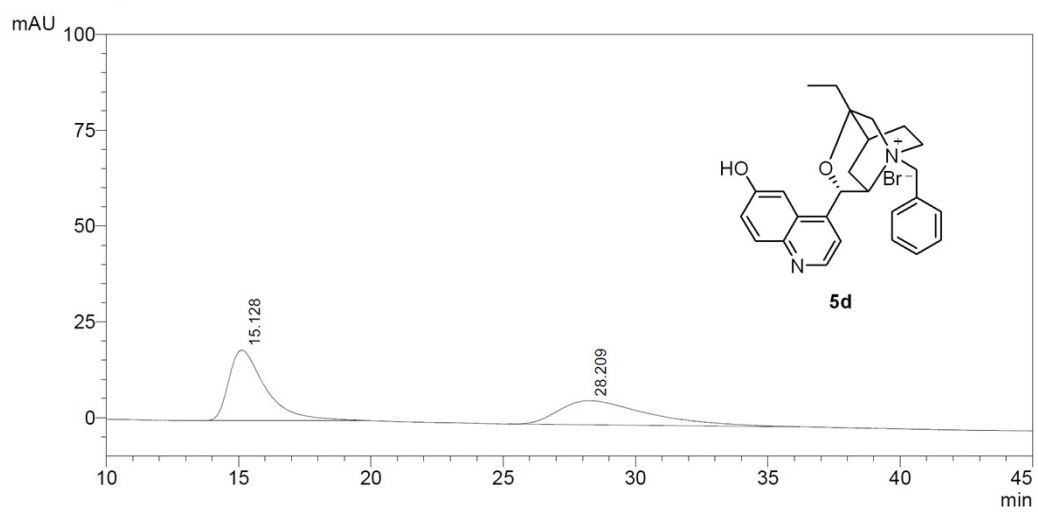

<Peak Table>

| Peak# | Ret. Time | Area    | Height | Area % |
|-------|-----------|---------|--------|--------|
| 1     | 15.128    | 1786000 | 18441  | 54.818 |
| 2     | 28.209    | 1472062 | 6312   | 45.182 |
